# Supplementary material for: A limbic circuit selectively links active escape to food suppression
Source: eLife. 2020 Sep 7;9:e58894. doi: 10.7554/eLife.58894 (PMC7476759; doi:10.7554/eLife.58894)
Supplement: Supplementary file 2. — Data is sorted by fold-change (log2) in restraint stress (RS) samples compared to Naïve (N) samples along with the corresponding q-values. [file elife-58894-supp2.xlsx]

## Sheet: Sheet1
Supplementary File 2
Table 2: Phospho-TRAP differential gene expresion
Gene	Average IP/INP (log2 Fold Change) in RS samples	q Value	Average IP/INP (log2 Fold Change) in Naïve Samples	q Value
Eif3j2	-11.52	0	-24.84	1e-06
Ccl27b	23.56	3e-06	11.17	0
Gm45935	9.63	0	-0.07	0.917
Fam205a1	3.59	0.0437	-4.95	0.176
Magix	5.96	0.0204	-2.2	0.277
Rd3l	6.85	0.000823	-0.24	0.937
Gm38431	6.5	0.00288	-0.57	0.939
Gm14015	6.01	0.0132	-0.81	0.884
Gm6961	5.7	0.0317	-0.78	0.89
E330017L17Rik	6.15	0.00877	-0.19	0.952
Gm30551	6.59	0.00208	0.34	0.912
2010308F09Rik	6.13	0.0101	-0.08	0.967
Epcam	5.99	0.0146	-0.12	0.958
Clec7a	6.49	0.00306	0.62	0.675
Apol11b	7.49	5.9e-05	1.7	0.172
Lilrb4a	5.86	0.0204	0.16	0.953
Ccl4	7.02	0.000455	1.44	0.0862
Sun3	6.5	0.00414	1.04	0.654
Cxcl1	5.86	0.0198	0.78	0.842
Gm11961	6.12	0.0114	1.1	0.505
Ntf5	4.3	0.0163	-0.67	0.816
Ccdc68	6.14	0.00886	1.23	0.584
Gm13710	5.88	0.0246	1.07	0.619
Angptl3	5.69	0.0323	0.9	0.686
Itgb6	5.68	0.031	1.05	0.627
H2-Q7	4.56	0.00951	0.07	0.969
4930452N14Rik	5.68	0.0302	1.22	0.817
1700102H20Rik	5.79	0.0235	1.39	0.526
Prl	6.5	0.00299	2.54	0.112
B230208H11Rik	4.92	0.00156	0.96	0.48
Smco4	4.38	0	0.42	0.577
Gsdma	5.67	0.0336	1.79	0.461
3010003L21Rik	5.86	0.0196	2.14	0.351
1600014C23Rik	7.38	8.8e-05	3.66	0.0151
C630031E19Rik	4.12	0.0282	0.42	0.875
Asb18	5	0	1.42	0.242
Sox6os	5.84	0.0231	2.42	0.313
Gcgr	6.01	0.0131	2.69	0.2
2810410L24Rik	5.12	0	1.82	0
Gm15545	4.27	0.0202	1.02	0.512
4930563E18Rik	6.59	0.00227	3.4	0.0472
Grifin	4.03	0.0355	0.88	0.619
Ska1	4.02	0.0334	0.98	0.588
Itgae	5.14	0.00666	2.11	0.000777
Gm19705	4.71	0.00359	1.7	0.299
D6Ertd474e	3.28	0.0422	0.32	0.859
Smim22	3.04	0.000172	0.15	0.945
Fam187b	4.43	0.0102	1.55	0.58
Cldn2	1.68	0.000105	-1.2	0.61
Gm16551	4.07	5.5e-05	1.2	0.344
Prr32	2.52	9.1e-05	-0.34	0.936
Il17re	2.25	0.0203	-0.56	0.739
Rrh	4.04	0.0334	1.24	0.815
Kdf1	4.41	0.0115	1.64	0.391
Nanos3	2.87	0.00557	0.11	0.929
Myhas	2.62	0.0246	-0.1	0.97
Cox8b	4.36	0	1.66	0.355
Gm28626	5.49	0.0475	2.8	0.127
Snhg9	3.47	0.00301	0.79	0.53
1500015O10Rik	3.26	0	0.68	0.253
Hist1h1b	5.19	0	2.63	4e-06
Slc16a8	2.25	0.00128	-0.19	0.93
Hsd17b2	2.64	0.0407	0.23	0.914
Kcne2	2.15	0	-0.26	0.919
Gm41410	3.64	0.018	1.25	0.76
2810433D01Rik	3.57	0.0284	1.2	0.522
Calml4	1.62	4e-06	-0.73	0.188
Gm38560	3.42	0.000379	1.1	0.265
Gng5-ps	2.67	0.00303	0.37	0.732
4930447N08Rik	4.3	0.0149	2.01	0.39
Zfp691	2	0.0354	-0.25	0.828
Col8a2	1.36	0.0179	-0.89	0.457
Cox7a1	3.58	0	1.34	0.0169
Slc22a18	3.08	0.000833	0.84	0.358
Fap	3.03	0.000124	0.8	0.696
Orc1	2.78	0.0193	0.55	0.746
Pdzk1ip1	4.21	1.8e-05	2	0.0113
Cox6b2	3.17	0	1.02	0.00583
Gprc5a	2.42	0.0436	0.27	0.95
Rassf6	1.45	0.0486	-0.68	0.477
A930001A20Rik	3.56	0.00114	1.44	0.0947
Gnmt	1.69	0.0212	-0.38	0.847
4930429H19Rik	2.59	0.0171	0.57	0.619
Lsmem1	2.89	0.0161	0.89	0.403
9230009I02Rik	2.35	0.0424	0.36	0.864
Gm35612	2.63	0.000605	0.64	0.514
Hist1h2ab	4.65	0.00504	2.67	0.0118
Kntc1	1.63	0.0319	-0.35	0.709
Sp5	2.54	0.0198	0.57	0.714
Dhcr24	1.52	2e-06	-0.45	0.0543
Gm33727	2.14	0.00753	0.22	0.827
Gdf5	2.64	0.0412	0.74	0.755
Tgm4	-1.77	0.0466	-3.67	0.00181
1700007L15Rik	2.12	0.00295	0.26	0.801
Capn9	3.33	0.014	1.49	0.191
Gm6402	2.7	0.00191	0.88	0.281
Lgals3	1.42	0.0183	-0.39	0.625
Hist2h3b	2.85	0.0307	1.06	0.302
Gm20517	2.18	0.000513	0.39	0.408
4930592C13Rik	3.51	0.00282	1.72	0.29
Gm19935	0.86	0.028	-0.91	0.0196
Lbp	2.02	8.1e-05	0.27	0.795
Krt17	1.96	0.0215	0.22	0.854
1110020A21Rik	3.94	0	2.22	0
Rpl31-ps12	1.83	0.00182	0.13	0.863
Echdc2	1.7	0	0	0.998
1810034E14Rik	2.99	0.0123	1.3	0.408
Gm12296	2.92	0.00344	1.23	0.182
Lhcgr	2.27	0.0138	0.58	0.638
Cnn1	1.57	6.9e-05	-0.1	0.896
Col9a3	0.79	0.00917	-0.85	0.0201
Dnajb5	1.38	0.001	-0.26	0.019
Gm20743	2.15	0.000255	0.52	0.483
Prpf19	1.24	0	-0.39	0
Rps15a-ps6	3.77	0	2.17	0
4932412D23Rik	2.58	0.00153	0.98	0.517
Snhg8	2.01	1.6e-05	0.41	0.381
Mfap5	2.24	0.029	0.65	0.712
Rgs13	2.93	0.0476	1.36	0.165
Wdr86	3.07	0	1.5	0.166
Angptl2	1.69	0.000297	0.12	0.896
Tacstd2	2.06	0.00778	0.5	0.603
2410021H03Rik	-3.86	0.0387	-5.41	0.0606
Zic2	1.68	0.00166	0.14	0.809
Spaar	2.61	0.0386	1.08	0.28
Rps27	2.39	0	0.87	0
5033406O09Rik	1.57	0.0409	0.06	0.962
Eml2	1.28	0.0196	-0.23	0.003
Bcl2a1b	1.92	0.0492	0.42	0.64
Atf3	1.52	0	0.02	0.981
Stx4a	0.71	0.000144	-0.79	0
1810044D09Rik	2.71	8.1e-05	1.22	0.117
2900009J06Rik	2.77	2.3e-05	1.29	0.0478
Lsm14b	0.89	0.0106	-0.59	0.00717
Il15	2.62	6e-05	1.15	0.0838
Rax	3.21	0.0112	1.75	0.124
Rhod	2.08	0.000611	0.62	0.485
Iqcd	1.58	0.0228	0.12	0.901
Gm13872	1.57	0.00177	0.11	0.886
Ptgs2	1.36	0.00553	-0.09	0.896
Gm16938	1.32	0.013	-0.13	0.868
A330048O09Rik	2.25	5e-06	0.8	0.166
Acta2	1.54	0	0.09	0.651
Vpreb1	3.95	0.000425	2.52	0.13
2410006H16Rik	2.1	0	0.67	0.00108
Slc14a2	2.67	0	1.24	0.000245
Lst1	2.19	0.000698	0.76	0.185
2010005H15Rik	1.87	0.0358	0.45	0.607
1110038B12Rik	2.57	0	1.15	0.000839
Rdh5	2.49	0	1.08	0.00935
Kcnmb2	1.1	0.0113	-0.31	0.601
Rpl37rt	2.16	0	0.76	0.00172
Ccnk	1.41	0.00974	0.01	0.983
Sptan1	-0.37	0.000435	-1.76	0
Cldn5	1.66	0.0197	0.27	0.604
Zar1	1.86	8.6e-05	0.48	0.378
Crip1	2.48	0	1.1	0
Rpl34-ps1	2.48	0	1.11	0
Ptpn20	2.05	0.00722	0.68	0.48
Tnnt1	1.56	0.000153	0.2	0.81
BC039966	2.27	0.000531	0.91	0.2
Smim17	1.19	2e-06	-0.17	0.644
Gm3414	-2.95	0.00451	-4.31	0.00035
Tuba1c	2.54	1.8e-05	1.19	0.152
Rrad	1.95	0	0.61	0.0974
Crebl2	0.86	0	-0.47	0.0017
Cldn1	0.87	0.0393	-0.45	0.608
Etaa1os	3.75	0	2.44	0
1700012D01Rik	1.82	0.00401	0.51	0.539
Polr1a	-0.73	0.0153	-2.04	0
Apold1	1.39	0	0.09	0.801
Rab26os	2.35	0.00851	1.06	0.237
Tagln	2.21	0	0.92	4e-06
Hist1h4h	1.64	0.000428	0.35	0.434
Calca	1.43	0.0122	0.14	0.862
Cep162	-0.91	0.00367	-2.2	0
Miat	-2.77	0	-4.06	0
Spata3	2.31	0.0382	1.03	0.493
H2-T22	2.29	0	1.01	0
Steap2	1.27	0	-0.01	0.977
Snhg20	1	0.00471	-0.28	0.456
Cldn19	3.18	0.0102	1.91	0.284
Nts	1.93	0	0.66	0
Mdfic	1.57	0.0243	0.3	0.77
Sostdc1	1.67	0	0.41	0.355
Gm12657	1.52	0.0402	0.26	0.78
Pglyrp1	2.24	0.0313	0.99	0.407
Gm17750	3.13	0	1.88	0
G630025P09Rik	1.8	0.0445	0.55	0.605
Fbxl21	1.41	0.000336	0.18	0.713
Rab20	1.36	0.0105	0.13	0.885
Pidd1	1.11	0.0386	-0.12	0.895
Prkdc	-0.85	0.041	-2.08	0
Amot	1.09	0.0303	-0.13	0.852
Snhg1	2.4	0	1.18	0.0122
Tnnc1	1.51	0.000511	0.29	0.697
Fosl1	0.93	0.0268	-0.29	0.72
Urb1	-1.37	0.00139	-2.59	1e-06
Rps26	2.47	0	1.26	0
AU022754	2.2	0.0141	0.99	0.348
Trpm3	0.69	0.00113	-0.52	0.0447
2210011C24Rik	2.55	0.000864	1.34	0.0885
E330013P04Rik	2.55	0.0198	1.34	0.289
Gm11627	4.78	0	3.58	0
1600002K03Rik	2.58	0	1.38	0.00013
Onecut2	-3.45	0	-4.65	0
C230035I16Rik	2.59	0.00211	1.39	0.167
2810408I11Rik	3.67	1e-06	2.48	6.2e-05
E130114P18Rik	2.23	0	1.04	0.000181
Heph	1.44	0.0143	0.25	0.741
Defb1	2.02	0.0158	0.84	0.369
Per1	0.93	1.5e-05	-0.25	0.466
Snhg15	1.96	2e-06	0.78	0.0556
Nfil3	1.09	0	-0.08	0.759
Ttr	3.33	0	2.16	0
Atp2a1	2.98	0.0406	1.81	0.576
A930013F10Rik	-6.78	0.000632	-7.95	5e-06
Mgp	2.58	0	1.42	0
Gas5	1.28	0	0.12	0.202
Unc45b	1.92	0.0047	0.76	0.38
Platr17	1.64	0.0464	0.48	0.604
1700026J14Rik	3.12	0.000459	1.97	0.0305
Trrap	-1.01	6e-06	-2.16	0
E130215H24Rik	3.39	7e-06	2.24	0.00132
Pln	2.08	1e-06	0.93	0.0401
Prss8	5.49	0.0475	4.35	0.0255
5430416N02Rik	1.09	0.0205	-0.05	0.943
Snhg18	1.63	0.00256	0.49	0.428
Asgr1	2.97	0.000183	1.84	0.000882
1600020E01Rik	1.29	3.9e-05	0.16	0.67
Snhg4	1.08	0.000285	-0.05	0.904
Gm16677	2.59	0	1.46	0.000502
Usp28	-1.08	0.00013	-2.2	0
Pifo	1.29	0.00166	0.18	0.687
Hist1h4i	1.74	0.025	0.63	0.425
Ctla2a	1.51	0.0226	0.4	0.773
Nr4a3	1.49	0	0.38	0.54
Rmst	1.24	0.0244	0.13	0.864
S100a4	2.89	1.6e-05	1.79	0.0018
Tas1r1	1.87	0.00334	0.77	0.208
Gm12191	1.84	0.00576	0.74	1.2e-05
Nkx2-2os	1.3	0.0111	0.2	0.76
Tmed9	1.3	0	0.2	0.0193
5330416C01Rik	0.99	0.0496	-0.11	0.908
Sh3tc2	-2.11	0	-3.2	0
Gm15421	2.75	2e-06	1.66	0.00346
Gadd45b	2.54	0	1.45	0
Midn	1.78	6e-06	0.69	0.219
Gm14288	1.47	0.00276	0.38	0.447
Pex5l	0.72	0	-0.37	0.00122
Rps29	2.2	0	1.12	0
2010204K13Rik	2.04	0	0.96	0
Mest	1.01	0	-0.07	0.748
Phyhd1	0.8	0.0104	-0.28	0.42
Emd	0.69	0.00881	-0.39	0.0425
Csrnp1	-0.57	0.0419	-1.65	0.000335
Nav2	-0.85	0.00528	-1.93	0
B230311B06Rik	2.43	1.9e-05	1.36	0.0106
Fosb	2.35	0	1.28	0.0243
Ltc4s	1.51	0.00761	0.44	0.612
Igsf11	0.8	0.00828	-0.27	0.387
Rps21	2.3	0	1.23	0
Rpl37	1.95	0	0.88	0
Nupr1l	1.92	0.0109	0.85	0.324
Dnase1l1	2.04	0.000928	0.98	0.175
Tpm2	1.8	0	0.74	0.000532
Macf1	-1.1	0	-2.16	0
C030013G03Rik	3.49	0	2.44	4e-06
Rpl32	2.14	0	1.1	0
Epb41l4aos	2.06	0.000137	1.02	0.027
Cdc42ep5	2.82	3e-06	1.78	0.000459
Gm10012	2.65	0	1.62	0
2700099C18Rik	1.63	0.0201	0.6	0.458
Atp5mpl	2.96	0	1.94	0
Ifi27l2a	2.54	0	1.52	0.000183
Mt3	2.29	0	1.27	0
Fmc1	2	0	0.98	0
Snhg6	1.86	0	0.84	0.00224
Rd3	1.19	0.00592	0.17	0.797
Hmox1	1.01	0.00133	-0.01	0.988
Snta1	0.84	0	-0.18	0.205
Dgkk	-0.81	0.0463	-1.83	0
Rpl39	2.61	0	1.59	0
Rpl41	2.13	0	1.11	0
Wbscr17	2.01	0	0.99	0.00158
0610040B10Rik	2.77	0	1.76	0.0001
Cox7c	2.52	0	1.51	0
Rps27l	2.42	0	1.41	0
Jmjd4	1.28	0	0.27	0.049
9330104G04Rik	1.22	0.0129	0.21	0.739
Otx2	1.21	7e-05	0.2	0.638
Gm11827	5.68	0.0302	4.67	0.212
Cartpt	1.89	0	0.88	0
Map2k3os	1.89	0.000356	0.88	0.0751
Snrpg	2.45	0	1.45	0
Tmsb15b1	3.24	0	2.24	0
Gng5	1.9	0	0.9	0
Fxyd2	1.89	0	0.89	0.00141
Gm16998	3.12	0.048	2.13	0.237
Rpl22l1	2.79	0	1.8	0
A230009B12Rik	1.48	7e-06	0.49	0.157
Rbbp4	0.44	2.4e-05	-0.55	0
Rpl36	1.95	0	0.97	0
Mthfs	1.69	0	0.71	0.00215
Dynlt1f	1.52	0	0.54	0.000489
Dynlt1b	1.45	0	0.47	0.00205
Sertad1	1.26	0	0.28	0.246
Fos	0.99	0	0.01	0.949
Ifrd1	1.38	0	0.4	0.000269
Ptprb	-1.23	0.0498	-2.2	0.00189
Mcee	1.87	0	0.9	0
Rpl9	1.34	0	0.37	0
Gm32278	1.1	0.0113	0.13	0.842
Adcyap1	0.92	0.00144	-0.05	0.878
Eif2ak2	1.23	0.0265	0.26	0.696
Gm7334	0.65	0.00592	-0.32	0.284
Nms	2.32	1e-06	1.35	0.00348
Cdc25c	2.09	0.00939	1.12	0.171
Rps28	2.48	0	1.52	0
Dbil5	2.44	0.0393	1.48	0.194
Rpl37a	2	0	1.04	0
Cort	1.45	0.00335	0.49	0.359
Dnajb3	1.25	0.00363	0.29	0.566
Zfas1	0.9	0.000165	-0.06	0.861
Ryr1	-1.77	0.00602	-2.73	4.6e-05
Gm12338	2.37	0	1.42	0
Fkbp7	1.87	0.00173	0.92	0.0979
2310039H08Rik	1.85	0	0.9	0.000379
2900093K20Rik	1.85	0.00247	0.9	0.108
Prcd	1.78	1e-06	0.83	0.0859
Atf4	1.61	0	0.66	0
Dynlrb2	0.67	0.0278	-0.28	0.378
Diaph3	1.18	0.00195	0.23	0.688
Birc6	-0.76	0.000906	-1.71	0
Cox16	2.14	0	1.2	0
Gm13889	2.1	0	1.16	0
Rps27a	1.84	0	0.9	0
Gm12408	1.79	0.00194	0.85	0.145
Rpl27a	1.76	0	0.82	0
Gm36742	2.73	0.0054	1.79	0.138
Ndufa6	2.02	0	1.08	0
Prorsd1	1.28	5.9e-05	0.34	0.311
Gla	0.86	0.000648	-0.08	0.861
Art1	4.19	0.00133	3.26	0.00136
Jpx	1.29	0.000714	0.36	0.422
Sik2	-0.68	0.0135	-1.61	0
Prph	1.21	0.0296	0.28	0.686
Spry2	1.88	0	0.96	0.00461
Rps10	1.41	0	0.49	0
AI115009	2.79	0	1.88	0.000289
Dapl1	2.47	0.0208	1.56	0.0525
Ifitm1	2.14	3.2e-05	1.23	0.00301
Tmem258	1.62	0	0.71	0
Vwa5b1	-0.91	0.00597	-1.82	6e-06
6430503K07Rik	2.82	0.0024	1.91	0.0325
Ube2c	2.42	0	1.51	0.000439
Uqcr10	2.3	0	1.39	0
Rpl36a	1.98	0	1.07	0
Rps12	1.91	0	1	0
Atp5e	2.91	0	2.01	0
Lhx1os	1.59	0.00444	0.69	0.272
Eng	1.33	0.0148	0.43	0.52
Rpl13a	1.08	0	0.18	0.023
Hsbp1l1	1.76	0.00797	0.86	0.317
Lppos	1.76	3.4e-05	0.86	0.032
Gm14391	1.75	0	0.85	0
Gm20604	0.64	7.8e-05	-0.26	0.0963
1700023F06Rik	2.03	4.9e-05	1.13	0.0135
Prss22	1.4	0.0382	0.5	0.373
Fcor	2.24	0	1.35	0
Rps23	1.86	0	0.97	0
Bri3	1.84	0	0.95	0.00054
Mdn1	-1.71	1e-05	-2.6	0
Rps18	1.55	0	0.66	0
Mfap2	0.81	0.0327	-0.08	0.88
Cox6c	2.42	0	1.53	0
Rps8	1.68	0	0.79	0
Itgb3	-1.89	0.0217	-2.78	0.00872
Rps24	2.01	0	1.12	0
Rapsn	2.6	3e-06	1.72	0.000213
Rps17	1.87	0	0.99	0
Igf2	1.04	2e-06	0.16	0.544
Cenpa	2.36	0	1.48	0.000154
Atp5j2	1.99	0	1.11	0
Myo19	1.89	0	1.01	2.6e-05
2310040G24Rik	1.63	0.0117	0.75	0.176
Arpc3	1.4	0	0.52	0
Ap4e1	-1.21	0.0018	-2.09	1e-06
Folr1	2.5	0	1.63	0.27
Fgf17	2.08	0.000283	1.21	0.0298
Gstk1	1.31	0	0.44	0.0974
Ctnna3	-1.83	0.0355	-2.7	0.00388
Rps20	1.71	0	0.84	0
Hist3h2ba	1.47	0	0.6	0.00498
Impa2	0.82	0.0323	-0.05	0.925
Cmtm8	2.81	0	1.95	1e-06
Gm5148	1.57	0	0.71	0
Snhg10	1.57	1.1e-05	0.71	0.0466
Hacd1	0.68	0.00713	-0.18	0.537
Pcbd1	1.03	0	0.17	0.255
Zfhx2	-0.67	0.0405	-1.53	2e-06
B130034C11Rik	2.44	0	1.58	0.000551
Retn	2.3	0.00354	1.44	0.0349
2810429I04Rik	1.64	0.0394	0.78	0.325
Lrfn2	1.41	0.00568	0.55	0.28
Blvrb	1.17	0	0.31	0.186
1700120C14Rik	2.74	0.00112	1.89	0.0633
Cops9	2.02	0	1.17	0
Rpl35a	1.82	0	0.97	0
Pon2	1.28	0	0.43	0.00282
Tac2	1.05	0	0.2	0.304
Cdkn1a	0.53	0.000311	-0.32	0.134
6430411K18Rik	-3.09	0.0413	-3.94	0.0377
4922502B01Rik	1.77	0	0.92	0.00151
Pcsk4	1.52	1.7e-05	0.67	0.0976
Eyelinc18	1.47	0	0.62	0.000417
Rplp1	1.64	0	0.79	0
Chrna10	2.52	0.00594	1.68	0.0248
D330023K18Rik	2.33	0	1.49	0
Rpl7a	1.54	0	0.7	0
Gm6793	1.05	0.00528	0.21	0.571
Mpdz	-0.51	0.0446	-1.35	0
Cdh18	1.21	0.0087	0.37	0.457
Pomc	1.21	0.0151	0.37	0.469
Slc25a34	0.57	0.044	-0.27	0.478
Plekhd1os	5.84	0.021	5	0.188
Cmc4	2.78	0	1.94	0
Gpx8	1.96	1e-06	1.12	0.044
Cox8a	1.65	0	0.81	0
Cdh15	1.63	0	0.79	6.7e-05
Carlr	1.16	0.00351	0.32	0.509
Dock5	-1.66	2.3e-05	-2.49	0
Usmg5	2.96	0	2.13	0
Pemt	1.32	0.0015	0.49	0.276
Pts	1.27	0	0.44	0.0001
Pcbd2	1.47	0	0.64	0.000415
Sptbn1	-0.83	0	-1.66	0
Cox7a2	2.36	0	1.53	0
Msrb1	1.14	0.000127	0.31	0.315
Nxn	1.13	1.3e-05	0.3	0.312
Chrna1os	3.01	0	2.18	0.000358
Tgtp1	2.91	2.8e-05	2.09	0.0381
D630024D03Rik	2.52	0.000223	1.7	0.0753
Magoh	1.61	0	0.79	0
Pxdn	-1.02	8.1e-05	-1.84	0
Usp40	-1.03	0.000379	-1.85	0
Polr2l	1.88	0	1.06	0
Gm20754	1.38	0.0418	0.56	0.463
Myl9	1.16	0	0.34	0.026
Mt2	1.83	0	1.02	0
Atp5g2	1.29	0	0.48	0
Junb	1.29	0	0.48	0
Alk	1.27	0.0371	0.46	0.504
Spats1	1.26	0.0209	0.45	0.471
Tspo	1.25	1e-06	0.44	0.112
Erdr1	0.76	0.0202	-0.05	0.9
Megf8	0.84	7.8e-05	0.03	0.904
Taf1	-0.88	8e-06	-1.69	0
Mrpl33	2.4	0	1.59	0
Rpp21	2.32	0	1.51	0
S100a13	2.3	0	1.49	0
9330158H04Rik	2.09	0.0027	1.28	0.0303
Mt1	1.93	0	1.12	0
Rpl35	1.89	0	1.08	0
Tmem72	3.18	0	2.38	0.309
Akap13	-1.38	1.2e-05	-2.18	0
Lmo4	1.62	0	0.82	0
Romo1	2.06	0	1.26	0
Cd59b	1.82	0.00777	1.02	0.209
1700096K18Rik	0.92	0.0209	0.12	0.836
Nr4a2	0.66	7e-06	-0.14	0.692
Sema3b	1.44	0.00235	0.64	0.141
Ubr4	-0.62	0.00248	-1.42	0
1810022K09Rik	2.63	0	1.83	0
Gm10941	2.53	0	1.73	0.000515
Ramp3	1.14	0	0.34	0.112
Rpl38	2.29	0	1.5	0
Ubl5	2.17	0	1.38	0
Apoa2	1.95	0.00198	1.16	0.0526
Dus4l	1.54	2.2e-05	0.75	0.0255
Oxld1	1.12	8.4e-05	0.33	0.295
Ip6k2	1.11	2e-06	0.32	0.185
Tmem141	1.09	0	0.3	0.0733
4930563E22Rik	1.01	0.0005	0.22	0.478
Vip	0.92	1.5e-05	0.13	0.626
Rps2	0.74	0	-0.05	0.581
Hmga1	0.72	0	-0.07	0.672
Tsc1	-0.72	0.000764	-1.51	0
Slc26a2	-0.96	0.0222	-1.75	0.00101
Plac9b	0.82	0.0418	0.03	0.958
Tmem256	2.51	0	1.72	0
Slirp	2.5	0	1.72	0
Wfdc18	2.12	0	1.34	2.2e-05
Ndufs6	1.98	0	1.2	0
Rpl11	1.74	0	0.96	0
Cstb	1.73	0	0.95	0
Chrm3	1.24	0.00237	0.46	0.342
Ankrd55	0.87	0.00261	0.09	0.823
Rps13	1.7	0	0.92	0
Hist1h2bc	1.64	0	0.86	0
Ndufaf6	0.95	0	0.17	0.391
Gfpt2	-0.67	0.0377	-1.45	0.000205
Tmsb10	2.09	0	1.31	0
9230116N13Rik	1.9	0.00369	1.12	0.0782
Prr15	2.97	0.0283	2.2	0.067
Timm8b	2.31	0	1.54	0
Rpl24	1.83	0	1.06	0
Riiad1	1.75	0	0.98	0.000421
Rpl31	1.49	0	0.72	0
Sstr2	1.22	0	0.45	0.0403
Slc39a12	0.92	0	0.15	0.59
Msx1	1.43	0	0.66	0.117
Rpl18a	1.14	0	0.37	0
Cox7b	2.57	0	1.8	0
Gm13375	2.36	0	1.59	6.3e-05
Tbca	1.89	0	1.12	0
Atp5k	2.33	0	1.57	0
Fxyd5	1.56	0.00185	0.8	0.0962
Rpl21	1.55	0	0.79	0
Hspb1	1.29	0	0.53	0.0356
Rpl10	1.29	0	0.53	0
Taco1	0.99	0.00828	0.23	0.554
Cldn11	0.55	0.0352	-0.21	0.456
Eef1a1	0.52	0	-0.24	0
Ints2	-0.75	0.00694	-1.51	2e-06
Clec11a	1.58	6e-06	0.83	0.0038
6330409D20Rik	1.1	0.0479	0.35	0.636
Chchd7	2.33	0	1.58	0
Nat8f3	2.29	1.6e-05	1.54	0.0411
Ost4	2.06	0	1.31	0
Doc2g	2.04	0	1.29	0
Psmg4	1.96	0	1.21	0
Atpif1	1.88	0	1.13	0
Ccdc38	1.84	0	1.09	0
Ctxn2	1.84	0	1.09	0
Tomm5	1.51	0	0.76	0
Dnali1	-1.07	0.00537	-1.82	1e-06
Swi5	1.64	0	0.89	0
Gm266	1.38	2.9e-05	0.63	0.0892
Raph1	-0.91	0.00628	-1.66	0
Ndufc1	2.07	0	1.32	0
Smim8	2.07	0	1.32	0
Nrp	2.45	0	1.71	0.00029
Tnfrsf12a	1.6	0	0.86	0.0204
Zrsr1	2.23	0	1.49	0
Efcab10	2.13	0	1.39	0
Ly6g6f	2.13	2e-06	1.39	0.000645
A830052D11Rik	2.1	2.4e-05	1.36	0.00527
Chchd1	1.96	0	1.22	0
Nme3	1.95	0	1.21	0
Med21	1.91	0	1.17	0
5830454E08Rik	1.77	0.000256	1.03	0.044
Wfdc1	1.22	0.049	0.48	0.501
Med30	1.08	0	0.34	0.00686
Raly	0.95	2e-06	0.21	0.774
Coa4	0.88	0.000989	0.14	0.666
Rpsa	0.4	0.000824	-0.34	0
Cacna1b	-0.76	0.0453	-1.5	4e-06
Gstt1	1.13	0	0.39	0.0393
Selenoh	2.28	0	1.54	0
Mid1	1.57	0.00431	0.84	0.162
B3gnt6	1.37	0.0279	0.64	0.393
2810001G20Rik	2.58	0	1.85	0
3110039M20Rik	2.29	0	1.56	0
Rplp2-ps1	2.19	7e-06	1.46	0.000722
9630013A20Rik	1.97	0	1.24	0.00118
Ndufa2	1.96	0	1.23	0
Nop10	1.93	0	1.2	0
Uqcr11	1.9	0	1.17	0
Dbi	1.85	0	1.12	0
Lamtor5	1.54	0	0.81	0
Tnfsf13b	1.24	0.0275	0.51	0.394
Rps3a1	1.18	0	0.45	0
Stra6	1.05	0.00265	0.32	0.462
Bdh2	1.04	0.00386	0.31	0.488
Cmbl	1.02	1e-05	0.29	0.201
Stpg1	0.95	0.0486	0.22	0.706
1110017D15Rik	0.92	0.00228	0.19	0.581
Hpdl	1.66	0.00859	0.93	0.147
Lsm5	2.26	0	1.53	0
Gm11423	2.77	9.2e-05	2.05	0.00214
3110082J24Rik	2.62	4e-06	1.9	0.00127
Gm8773	1.6	0.0248	0.88	0.312
Fabp5	1.37	0	0.65	0
Tmem179b	1.35	0	0.63	0.0168
Rps3	1.12	0	0.4	0
Csrp2	0.81	0.00535	0.09	0.801
Cox6b1	2.17	0	1.45	0
Gm2694	1.81	0	1.09	0.00197
2310009B15Rik	1.66	0	0.94	0.000117
Dydc2	1.2	0.0208	0.48	0.453
1110032A03Rik	1	0	0.28	0.00305
Irf1	0.64	0.0467	-0.08	0.843
Snrpf	1.64	0	0.92	0
Rps11	1.63	0	0.91	0
Slc1a2	1.38	0	0.66	0
Cox6a2	2.05	0	1.33	0
Sec61g	2.68	0	1.97	0
Ndufv3	2.14	0	1.43	0
Gadd45g	1.59	0	0.88	0
Rn45s	1.57	0.0352	0.86	0.000722
Crem	1.33	0	0.62	7.7e-05
Gm14379	3.04	0.000357	2.33	0.00829
Atp5l	2.06	0	1.35	0
Rpl26	1.94	0	1.23	0
Pxmp2	1.82	0	1.11	3.8e-05
Rpl17	1.81	0	1.1	0
Churc1	1.76	0	1.05	0
Timm10b	1.74	0	1.03	0
Rdm1	1.73	0	1.02	0
Ddt	1.67	0	0.96	0
Nme4	1.13	0.00605	0.42	0.376
H2-K1	0.83	0.000675	0.12	0.722
Emp2	0.72	8.9e-05	0.01	0.97
Lyst	-0.99	0.0139	-1.7	5e-06
Rtl1	-3.25	0.0012	-3.96	0.00239
Sod3	1.39	0	0.68	0.0395
1810014B01Rik	2.55	0	1.84	0
Sem1	2.03	0	1.32	0
1700020L24Rik	3	0.000166	2.3	0.00214
Ndufb4c	2.14	0	1.44	0
Atox1	2.19	0	1.49	0
1190007I07Rik	2.17	0	1.47	0
Ndufa3	2.17	0	1.47	0
Timm10	2.09	0	1.39	0
Mrpl54	1.9	0	1.2	0
Ndufb2	1.9	0	1.2	0
Ggact	1.76	0	1.06	0
Mrps21	1.74	0	1.04	0
Znrd1	1.74	0	1.04	0
Uba52	1.71	0	1.01	0
Gpx1	1.7	0	1	0
Higd2a	1.64	0	0.94	0
Polr2f	1.51	0	0.81	0
Pam16	1.39	0	0.69	0
Lbh	1.16	0.000915	0.46	0.296
Dio2	0.52	0.00669	-0.18	0.592
Airn	2.51	0.000574	1.81	0.0223
Sln	2.66	0	1.97	0
Dmac1	2.45	0	1.76	0
Rps15a-ps4	2.45	0	1.76	1e-06
D8Ertd738e	1.58	0	0.89	0
Ddit3	0.81	0	0.12	0.416
Smim26	2.38	0	1.69	0
Ndufa1	2.11	0	1.42	0
Gtf2a2	2.02	0	1.33	0
Rpl27	1.88	0	1.19	0
Rps16	1.68	0	0.99	0
Morn2	1.66	0	0.97	0
Rps14	1.49	0	0.8	0
Gal	0.84	0	0.15	0.347
Tomm7	2.35	0	1.67	0
Serpina3g	2.14	0.000186	1.46	0.0912
2010001A14Rik	1.1	0.035	0.42	0.425
Fabp7	1.61	0	0.93	0
Gm4349	1.07	0.0166	0.39	0.466
Rps5	1.05	0	0.37	0
Fry	-0.62	0.00121	-1.3	0
Mapk8ip2	-0.9	0	-1.58	0
Smim4	2.23	0	1.55	0
Smim18	1.99	0	1.31	0
Hyal3	1.97	0.0286	1.29	0.111
Mrpl52	1.96	0	1.28	0
Mrpl53	1.92	0	1.24	0
Cox17	1.88	0	1.2	0
Rps19	1.45	0	0.77	0
Rps7	1.21	0	0.53	0
Gm4876	1.02	0.0174	0.34	0.487
1700003M07Rik	0.74	0.00487	0.06	0.866
Coq10b	0.58	1e-06	-0.1	0.541
Slc22a5	-0.7	0.0271	-1.38	1e-06
Firre	-2.28	0	-2.95	0
C2cd4d	2.62	1e-06	1.95	2.5e-05
Catspere2	1.1	0.0366	0.43	0.477
Mcrip2	1.09	0	0.42	0.0368
Rpl18	1.49	0	0.82	0
Ryr2	-0.6	0.0298	-1.27	1e-06
Polr2k	2.23	0	1.56	0
Mgst1	2.04	0	1.37	0
0610009L18Rik	2.02	0	1.35	0
Gm6297	1.96	0.000191	1.29	0.0023
Snhg12	1.9	0	1.23	0
Cck	1.75	0	1.08	0
Rpl19	1.4	0	0.73	0
A330093E20Rik	1.2	0.00582	0.53	0.348
Igsf1	0.95	0.000208	0.28	0.357
Tceanc	-0.96	0.0201	-1.63	0.00194
S100a6	2.26	0	1.59	0
Rplp2	1.81	0	1.15	0
Rnaseh2c	1.56	0	0.9	0
Pfdn5	1.54	0	0.88	0
Mrps36	1.5	0	0.84	0
Tinf2	1.34	0	0.68	0.000412
Chrac1	1.32	0	0.66	0
Rpl3	0.64	0	-0.02	0.738
4933439C10Rik	0.52	0.0477	-0.14	0.624
Ss18l2	2.65	0	1.99	0
Serf1	1.94	0	1.28	0
G630016G05Rik	1.91	0.00546	1.25	0.0735
Lsm7	1.73	0	1.07	0
Rpl23	1.67	0	1.01	0
Rps15	1.66	0	1	0
Tmem126a	1.66	0	1	0
Nenf	1.44	0	0.78	0
Rasl11a	1.21	2e-06	0.55	0.203
Cd55	1.14	0.00177	0.48	0.253
Grtp1	1.14	0.00166	0.48	0.181
Hspa1b	0.94	0.000262	0.28	0.335
Fdx1l	0.73	0	0.07	0.608
2300009A05Rik	0.69	0.0027	0.03	0.907
Abracl	2.14	0	1.49	0
Stk19	1.6	0	0.95	0
Galr1	1.34	1.3e-05	0.69	0.142
Pfdn4	1.49	0	0.84	0
Smim5	1.47	0.00558	0.82	0.168
Rpl12	1.33	0	0.68	0
Rgs2	0.23	0.0171	-0.42	0
A830082N09Rik	-0.85	0.0106	-1.5	0
Gm26641	3.33	2.5e-05	2.68	3.3e-05
9130024F11Rik	2.57	0	1.92	0
Ndufa4	2.46	0	1.81	0
Mrpl20	2.25	0	1.6	0
Mustn1	1.92	0	1.27	0.00151
Bola2	1.64	0	0.99	0
Ankrd2	1.17	0.0382	0.52	0.476
Cyr61	0.84	7.3e-05	0.19	0.621
Lrch3	-1.38	0	-2.03	0
Trim14	-2.33	0.0164	-2.98	0.0014
Scrg1	2.33	0	1.69	0
1500011K16Rik	1.78	0	1.14	0
Mrpl36	1.37	0	0.73	0
Rps4x	1.05	0	0.41	0
Leng8	-1.92	0	-2.56	0
Ppp2r5e	1.51	0	0.87	0
Spint2	1.32	0	0.68	0
Rpl14	1.3	0	0.66	0
Hopx	1.24	0	0.6	0
Rpl8	1.04	0	0.4	0
Btd	0.99	5.7e-05	0.35	0.303
Crym	0.81	0	0.17	0.00937
Eef1g	0.27	0.00986	-0.37	0
Ppp1r9a	-0.67	0	-1.31	0
Krtcap2	2.21	0	1.57	0
Smim27	2.03	0	1.39	3.2e-05
Uqcrh	1.95	0	1.31	0
Ndufa7	1.92	0	1.28	0
Crh	1.89	0	1.25	0
Trappc2l	1.76	0	1.12	0
Polr1d	1.69	0	1.05	0
Gpx7	1.65	0	1.01	0.000334
Tmem14c	1.45	0	0.81	0
Anapc13	1.39	0	0.75	0
Vps13d	-0.76	0.0426	-1.4	0.0007
Ubr1	-1.02	1e-06	-1.66	0
Gm15417	2.74	0	2.11	0
Fxyd1	2.2	0	1.57	0
Rnpc3	-0.72	0.00547	-1.35	0
Nup160	-1.68	0	-2.31	0
Meig1	1.56	0	0.93	5.1e-05
Pstk	1.54	0	0.91	0
Etfbkmt	1.51	0	0.88	0.00126
Sod1	1.51	0	0.88	0
Mrps28	1.31	0	0.68	0
Psmc3ip	1.23	0.000405	0.6	0.0696
Isy1	0.68	6.8e-05	0.05	0.842
Gm5424	0.47	0.0163	-0.16	0.507
Sf3b6	2.26	0	1.63	0
Cldn10	2.07	0	1.44	0
Mif	1.69	0	1.06	0
4931440P22Rik	1.63	0.00246	1	0.204
Pcsk5	0.83	0.00881	0.2	0.531
Dync2h1	-1.26	8e-05	-1.89	0
Uqcrq	2.22	0	1.6	0
Hspe1	2.08	0	1.46	0
Nme2	1.84	0	1.22	0
Il18	1.78	0	1.16	0
Ccdc163	1.75	0.00847	1.13	0.0963
1810037I17Rik	1.61	0	0.99	0
Mrps16	1.58	0	0.96	0
Cenpo	1.08	0.0179	0.46	0.344
Egr4	1.05	0	0.43	0.00066
1110065P20Rik	1.04	0	0.42	7.6e-05
Kdm4a	-0.98	0.00203	-1.6	0
Malsu1	1.55	0	0.93	0
Med31	1.54	0	0.92	0
Rpl29	1.44	0	0.82	0
Vim	0.74	0.000883	0.12	0.677
Zic4	0.71	0.000197	0.09	0.661
Pakap	-0.58	0.000449	-1.2	0
Zkscan6	-0.62	0.0103	-1.24	0
Rbp1	1.97	0	1.35	0
Tmsb15l	1.95	0	1.33	1e-06
Ssr4	1.72	0	1.1	0
2410015M20Rik	1.67	0	1.05	0
Lin28b	-1.51	0.0342	-2.13	0.0017
A230051N06Rik	3.78	0	3.16	0
Wfdc17	2.5	0.000819	1.89	0.00573
C030005K06Rik	2.16	0.0084	1.55	0.0394
Gm1673	2.04	0	1.43	0
Uqcrb	1.85	0	1.24	0
4933407L21Rik	1.78	0	1.17	2e-06
Immp1l	1.61	0	1	0
Hemk1	1.34	0	0.73	0.00363
Hint1	1.34	0	0.73	0
Mrps33	1.12	0	0.51	0
Nudt7	1.09	3.2e-05	0.48	0.0907
Tmem206	1.05	0	0.44	1.6e-05
Ier3	0.81	0.00424	0.2	0.519
Zswim6	-1.15	0.00248	-1.76	5e-06
Pprc1	-1.39	0	-2	0
Igfbp7	1.49	6e-06	0.88	0.0104
Cbln1	1.43	1e-06	0.82	0.0293
Acta1	1.23	0	0.62	0.00251
Rpl7	1.23	0	0.62	0
Tmem176a	1.18	0	0.57	0.0147
Ufsp1	0.98	0.00012	0.37	0.147
Shc4	0.83	0.0248	0.22	0.707
1110006O24Rik	3.28	0	2.67	1e-06
Ccl19	2.9	0	2.29	0
Grcc10	1.92	0	1.31	0
Gjd3	1.91	0.022	1.3	0.115
9330020H09Rik	1.9	3.7e-05	1.29	0.00798
Gpx4	1.39	0	0.78	0
S100a1	2.29	0	1.69	0
Cox14	2.22	0	1.62	0
Sec61b	1.87	0	1.27	0
Uxt	1.85	0	1.25	0
Polr2i	1.81	0	1.21	0
Tmem219	1.74	0	1.14	0
1700008O03Rik	1.73	0.0108	1.13	0.0822
Dad1	1.58	0	0.98	0
Urah	1.56	0.00111	0.96	0.136
Rab9	1.54	0	0.94	0
Washc3	1.35	0	0.75	1e-06
Ucp2	1.32	0	0.72	0
Lmcd1	0.93	5e-06	0.33	0.167
Dusp2	0.92	0.0375	0.32	0.665
Rpl10a	0.8	0	0.2	0.0514
Mir124a-1hg	-3.82	0	-4.42	0
Prrg2	1.53	2.9e-05	0.93	0.0231
Gng13	1.27	0	0.67	1.1e-05
Vkorc1	1.25	0	0.65	1.1e-05
Rpl13	1.18	0	0.58	0
Rnf7	0.97	0	0.37	0
Chodl	0.88	0.00286	0.28	0.462
Vasp	0.85	0.0124	0.25	0.536
Ercc8	0.49	0.0306	-0.11	0.685
Zdbf2	-0.59	1.9e-05	-1.19	0
Hist2h2aa1	1.97	0	1.37	0
Ndufa13	1.88	0	1.28	0
1700028J19Rik	1.65	0.00181	1.05	0.0742
Tmem203	1.63	0	1.03	0.000234
Cdc7	-1.49	1e-06	-2.09	0
Lockd	3.45	0	2.86	0
Apoc1	2.56	1.2e-05	1.97	0.00276
Agbl5	1.6	0	1.01	0
Avpi1	1.6	0	1.01	0
Coprs	1.07	0	0.48	0
Cmss1	1.02	0	0.43	0.0237
Cd74	0.81	0.00931	0.22	0.536
Dusp1	0.67	0	0.08	0.535
Scrib	-1.21	5.5e-05	-1.8	4.4e-05
Snrpd2	1.52	0	0.93	0
Ndufs4	1.49	0	0.9	0
Gm16364	1.44	0.00364	0.85	0.0581
Hmg20b	0.95	0.000818	0.36	0.295
Npy	0.85	0	0.26	0.00492
Fam58b	0.84	0	0.25	0.0669
Timmdc1	0.76	0.0464	0.17	0.698
Selenow	0.74	0	0.15	0.000357
Cib2	0.7	1e-06	0.11	0.519
Zfp511	0.7	0.000146	0.11	0.622
Ly96	2.3	0.0027	1.71	0.0206
Ifitm2	2.05	0	1.46	0
Notch4	1.65	5.2e-05	1.06	0.00748
Cox6a1	1.63	0	1.04	0
Ndufaf8	1.38	0	0.79	0
Egr2	1.14	0	0.55	0.0581
Cdkl1	1.13	0	0.54	0.0222
Snhg11	-2.72	0	-3.31	0
Cdr1	-4.37	0	-4.96	0
Acot13	1.86	0	1.28	0
Uqcc2	1.84	0	1.26	0
Ndufa11	1.75	0	1.17	0
Pcp4	1.75	0	1.17	0
Ndufb5	1.72	0	1.14	0
Bloc1s1	1.56	0	0.98	0
Tomm6	1.53	0	0.95	0
Mrps6	1.36	0	0.78	0
Use1	1.28	0	0.7	0
Txndc17	1.12	0	0.54	0
Pgbd1	0.91	0.0107	0.33	0.435
Acadl	0.44	0.00377	-0.14	0.424
4933427D14Rik	-0.51	0.0356	-1.09	9e-06
Utp20	-1.14	0.00817	-1.72	0.000286
Cbwd1	1.48	0	0.9	0
Mrpl23	1.47	0	0.89	0
Slc15a2	1.46	0	0.88	0.000614
Bex1	1.4	0	0.82	0
Kti12	0.73	6e-06	0.15	0.464
Pigt	0.59	0.0353	0.01	0.982
Cspp1	-1.07	0.00738	-1.65	0
Gm17660	3.16	0.0111	2.59	0.0147
Fam229b	2.22	0	1.65	0
Rnasek	1.79	0	1.22	0
4933412O06Rik	1.62	0.00594	1.05	0.0902
Acyp1	1.54	0	0.97	0
Fgf16	1.37	0.00769	0.8	0.0903
Tmem223	1.35	0	0.78	0
Srp14	1.32	0	0.75	0
Fbxl8	1.3	0.00395	0.73	0.15
Hsd17b11	1.03	0.0293	0.46	0.378
1700007K13Rik	0.78	0.00518	0.21	0.476
U2af1	0.65	0.000219	0.08	0.504
Dusp28	0.64	0	0.07	0.58
Actr2	-0.74	0	-1.31	0
AW554918	-0.96	0.000226	-1.53	1e-06
Atad2b	-1.2	0.000268	-1.77	3e-06
Zfp568	-1.78	0.00609	-2.35	0.00127
Fam162a	1.5	0	0.93	0
Cyp4v3	1.43	0.000956	0.86	0.101
Cib1	1.39	0	0.82	1e-06
Dmkn	1.39	0	0.82	0.00022
Ppih	1.24	0	0.67	0.000344
Ufm1	1.17	0	0.6	0
Tmem254b	0.96	0	0.39	0.676
Trim7	0.83	0.00183	0.26	0.402
Serpinf1	0.7	0.0109	0.13	0.699
Stk32b	0.6	0.0149	0.03	0.935
Ninl	-0.9	0.0393	-1.47	0.00148
A730063M14Rik	3.01	0	2.44	0
3110009E18Rik	1.9	0.000233	1.33	0.00427
Rpl30	1.68	0	1.11	0
Slc25a18	1.66	0	1.09	0
Med23	-1.11	1.9e-05	-1.68	0.0234
Lime1	-2.52	0	-3.09	0
Polr2j	2.22	0	1.66	0
Gm13205	2.84	0	2.28	0
Txn1	2.08	0	1.52	0
AA387883	1.83	0	1.27	0.000215
Eif1b	1.8	0	1.24	0
Paxx	1.77	0	1.21	0
Nhlh2	1.7	0.000191	1.14	0.0157
Tma7	1.62	0	1.06	0
Ndufb3	1.59	0	1.03	0
Cox4i1	1.58	0	1.02	0
Fkbp1b	1.25	0	0.69	0
Cd59a	1.06	0	0.5	0.0634
Gm2061	0.98	0.0113	0.42	0.192
Imp3	0.93	0	0.37	0.00664
Rraga	0.87	0	0.31	4e-05
Tyw5	0.85	0.00154	0.29	0.28
Eef1akmt4-ece2	0.79	0.000106	0.23	0.779
E2f5	0.68	0.000309	0.12	0.606
Hnrnph3	0.45	0.000137	-0.11	0.384
Taf13	0.44	0.00126	-0.12	0.515
Abt1	0.4	0.0031	-0.16	0.291
Enpp2	0.39	0	-0.17	0.061
Unc79	-0.69	0.0134	-1.25	1.2e-05
Cog3	-1.21	0	-1.77	0
S100b	1.43	0	0.87	0
Tpt1	1.43	0	0.87	0
Nbdy	1.41	0	0.85	0
Fam166a	1.2	0	0.64	1.3e-05
Cst6	1.18	3e-06	0.62	0.0262
Resp18	1.16	0	0.6	0
Cmtm3	0.83	0.00053	0.27	0.437
Tns2	-0.62	0.0292	-1.18	0.000156
Lcat	1.65	0	1.09	3.2e-05
Ggnbp2os	2.19	0	1.64	0
Sf3b5	1.82	0	1.27	0
Naa38	1.78	0	1.23	0
Cox5b	1.72	0	1.17	0
Hcfc1r1	1.72	0	1.17	0
Ly6g6e	1.71	7.1e-05	1.16	0.002
Cdca3	1.7	0.00103	1.15	0.0315
Isca2	1.49	0	0.94	0
Frat2	1.33	0	0.78	0.000381
Rnaset2a	1.28	0	0.73	0
Tmem42	1.1	0	0.55	0.00575
Sp3os	1.07	0	0.52	0.00317
Surf2	1.03	0	0.48	2.7e-05
Nudt13	0.99	2.1e-05	0.44	0.0625
Ccdc28a	0.93	0	0.38	0.00191
Tmem107	0.85	5e-05	0.3	0.106
Psmb4	0.84	0	0.29	0
Gemin7	0.77	0	0.22	0.0426
Gem	0.75	8.1e-05	0.2	0.691
Eif3h	0.64	0	0.09	0.372
Kl	0.62	0.0212	0.07	0.911
Commd7	0.52	2e-05	-0.03	0.831
Prrc2b	0.51	6.3e-05	-0.04	0.79
Arc	0.21	0.0298	-0.34	6.2e-05
Mybbp1a	-0.54	0.00452	-1.09	0
Rgs5	-1.29	2.2e-05	-1.84	0.0258
Fau	1.48	0	0.93	0
Mia	1.48	0.0224	0.93	0.102
Rpl23a	1.48	0	0.93	0
Phpt1	1.47	0	0.92	0
Patl2	1.46	0.0386	0.91	0.203
Alkbh3	1.23	0	0.68	0.00271
Trip6	0.94	0.031	0.39	0.429
Mrps22	0.7	1.4e-05	0.15	0.412
Loxl3	0.57	0.0114	0.02	0.948
Cox20	1.66	0	1.11	0
Ndufc2	2	0	1.46	0
Rps25	1.94	0	1.4	0
1700123M08Rik	1.71	0.00262	1.17	0.0423
Nkain4	1.67	0	1.13	0
2900076A07Rik	1.58	8.9e-05	1.04	0.00589
Laptm4a	1.53	0	0.99	0
Fuom	1.49	0	0.95	0
0610012G03Rik	1.29	0	0.75	0
Lyrm2	1.24	0	0.7	0
Ppia	1.1	0	0.56	0
Ggh	1.07	1e-06	0.53	0.0206
Mrpl27	1.07	0	0.53	0
Mrpl32	1.01	0	0.47	0.000593
Plekho1	0.96	1.1e-05	0.42	0.0644
Rpl15	0.91	0	0.37	0
Psmb7	0.89	0	0.35	0
Gcsh	0.88	0	0.34	1e-06
Gon7	0.75	0.000105	0.21	0.309
Selenot	0.52	0.0145	-0.02	0.937
Ccnl1	-0.69	0.000202	-1.23	0
Mtor	-1.24	0	-1.78	0
Pfdn1	1.22	0	0.68	0
Rpe65	1.2	0.0204	0.66	0.221
Myl6	1.16	0	0.62	0
Tmem67	-0.68	0.0452	-1.22	0.00124
Kif22	2.05	1e-06	1.51	8.4e-05
Snhg3	2.25	0	1.72	0
Rec114	1.95	0.0364	1.42	0.117
Gm16712	1.83	0.0219	1.3	0.0935
3110045C21Rik	1.71	0.000387	1.18	0.0209
Ccl27a	1.69	0	1.16	0
Hspb11	1.62	0	1.09	0
Mrpl34	1.57	0	1.04	0
Ramp1	1.55	0	1.02	0
Zfp560	1.33	0	0.8	9e-06
Snrnp25	1.32	0	0.79	0
Gm42274	1.09	0.00746	0.56	0.159
Eif3j1	0.85	0	0.32	0.816
Nsa2	0.85	1e-06	0.32	0.0491
Srsf5	0.82	0	0.29	1e-06
Srcap	0.76	1.6e-05	0.23	0.265
Pcdhgb7	0.74	0.0186	0.21	0.641
Rnd2	-0.38	0.000584	-0.91	0
Plec	-0.45	0.0349	-0.98	2e-06
Zbtb5	-0.52	0.0191	-1.05	0
Htt	-1.22	1.8e-05	-1.75	0
Dusp14	1.46	0	0.93	0
Lsm8	1.45	0	0.92	0
Atp5h	1.44	0	0.91	0
Rps9	1.14	0	0.61	0
Mindy4	-0.87	0.00174	-1.4	1e-06
Cks2	2.34	0	1.81	1e-06
Pbx4	1.1	0	0.58	0.000663
Saxo2	1.09	0.00433	0.57	0.122
9530062K07Rik	2.12	0.00264	1.6	0.00898
Acyp2	1.81	0	1.29	0
1110008P14Rik	1.8	0	1.28	0
Flywch2	1.65	0	1.13	0
Ccdc155	1.48	0.00471	0.96	0.0783
1700112J16Rik	1.47	0.00131	0.95	0.0261
H3f3a	1.33	0	0.81	0
Fam96b	1.31	0	0.79	0
Hint2	1.25	0	0.73	0
Selenof	1.24	0	0.72	0
Serf2	1.07	0	0.55	0
Myl12a	0.99	0	0.47	5.7e-05
Nit2	0.85	3.5e-05	0.33	0.0735
Nop53	0.85	0	0.33	0.00116
Cyp7b1	0.82	0.0149	0.3	0.442
Camk2n2	0.7	0	0.18	0.0762
Eef1b2	0.68	0	0.16	0.0337
Ghr	0.68	0.0131	0.16	0.687
Ifitm7	0.61	0.00157	0.09	0.691
Nr4a1	0.59	0	0.07	0.625
Babam2	0.51	0.00253	-0.01	0.974
Acaa2	0.47	0.00691	-0.05	0.843
Aida	0.47	0.00355	-0.05	0.767
Atxn2l	-0.43	0.035	-0.95	0
Cnot10	-0.51	0.000475	-1.03	0
Iqgap1	-0.78	0.0298	-1.3	0.000132
Atp7a	-1.29	3.3e-05	-1.81	1.7e-05
Borcs8	1.19	0	0.67	0
Naca	1.16	0	0.64	0
Snapc5	1.89	0	1.37	0
Hic2	-1.88	0	-2.39	2e-06
Lamtor4	1.33	0	0.82	0
Actg2	1.79	0.0337	1.28	0.299
Shisa2	1.7	0	1.19	0
Col12a1	1.6	0.000454	1.09	0.014
Man2c1os	1.58	0.0115	1.07	0.0849
Crabp1	1.55	0	1.04	9e-06
Sst	1.53	0	1.02	0
Med29	1.47	0	0.96	0
Magohb	1.26	0	0.75	0.000219
Gabarap	1.25	0	0.74	0
Cmc2	1.21	0	0.7	2e-06
E030024N20Rik	1.05	0	0.54	0
Id2	1.01	0	0.5	0
Fam183b	0.89	0.000416	0.38	0.0926
Fbxo36	0.77	0.00955	0.26	0.451
Arl4c	0.73	0.00104	0.22	0.366
Eif3f	0.61	1e-06	0.1	0.379
Lyrm7	0.53	0.0026	0.02	0.942
Araf	0.52	0	0.01	0.874
Paip2b	-0.47	0.00149	-0.98	0
Ankrd44	-1.33	0.000805	-1.84	0.000334
Mcts1	1.43	0	0.92	0
Minos1	1.16	0	0.65	0
Ogfod3	1.15	4e-06	0.64	0.0151
Mrps14	1.14	0	0.63	0
Trir	1.11	0	0.61	0
Pdpn	2.02	0	1.52	3.7e-05
Hist1h4d	1.98	0	1.48	0
Trmt61b	1.96	0	1.46	0
2810029C07Rik	1.89	0	1.39	0
Tmem88	1.87	0	1.37	0
Spcs1	1.78	0	1.28	0
Ndufb7	1.76	0	1.26	0
Ovol3	1.71	0.000346	1.21	0.0126
Tnfrsf13b	1.7	0.000258	1.2	0.00792
Tmem60	1.6	0	1.1	0
Znhit3	1.59	0	1.09	0
Ndufaf2	1.54	0	1.04	0
Mrps24	1.5	0	1	0
Ccpg1os	1.49	0	0.99	0
Dynll1	1.49	0	0.99	0
Atp5g3	1.44	0	0.94	0
Gm4988	1.25	0	0.75	0.000457
Atp6v0e	1.19	0	0.69	0
A330102I10Rik	1.05	0.00156	0.55	0.0946
Prkra	0.88	1e-06	0.38	0.0202
Gmnn	0.85	0.00522	0.35	0.245
Rpl22	0.85	1e-06	0.35	0.0334
Rnf138rt1	0.8	0.0299	0.3	0.468
Hist3h2a	0.94	0	0.44	0.000687
Fancl	0.69	0.00386	0.19	0.495
Atp5j	1.42	0	0.92	0
Ndufb9	1.42	0	0.92	0
Gabarapl2	1.18	0	0.68	0
Hddc2	1.16	0	0.66	4e-06
Uhrf1	1.14	0.0273	0.64	0.403
Zfp212	-0.57	0.0166	-1.06	9e-06
Ago1	-0.62	0.049	-1.11	0.000271
Egr3	0.91	0	0.42	0.00061
Glrx	0.67	0	0.18	0.108
Pantr1	2.46	0	1.97	0
Pop5	2.19	0	1.7	0
Gng3	1.89	0	1.4	0
C1qtnf5	1.82	0	1.33	0
Cisd3	1.82	0	1.33	0
Smim11	1.78	0	1.29	0
Mdk	1.77	0	1.28	0
C030018K13Rik	1.66	0.000795	1.17	0.0306
Mien1	1.65	0	1.16	0
Bex4	1.63	0	1.14	0
Amn1	1.61	0	1.12	0
Elob	1.59	0	1.1	0
Trmt112	1.57	0	1.08	0
Polr2h	1.47	0	0.98	0
2810414N06Rik	1.44	0	0.95	0.0001
Manf	1.44	0	0.95	0
D930020B18Rik	1.43	0.0375	0.94	0.182
Spa17	1.43	2.4e-05	0.94	0.0024
Apopt1	1.3	0	0.81	0
Dubr	1.28	9e-06	0.79	0.013
Rom1	1.27	2e-06	0.78	0.0102
Sap18b	1.19	0	0.7	0
Psmb10	1.04	0	0.55	0
Cdc34	1	0	0.51	0
Fxyd7	0.98	0	0.49	7e-06
Snu13	0.88	0	0.39	0
Eif3k	0.85	0	0.36	2e-06
Oxtr	0.76	0.0135	0.27	0.345
Zranb3	0.75	0.0267	0.26	0.552
Polb	0.73	0	0.24	0.024
Surf1	0.65	0	0.16	0.0764
Ppox	0.58	0.0165	0.09	0.77
Cbx3	0.52	2.7e-05	0.03	0.855
Lynx1	0.51	1e-06	0.02	0.833
Epn1	0.42	0.00613	-0.07	0.588
Phyh	0.38	0.000221	-0.11	0.167
Echs1	0.26	0.027	-0.23	0.0205
Slc7a6	-1.17	9.4e-05	-1.66	1e-06
Pik3c2a	-1.25	8.5e-05	-1.74	1e-06
Thoc2	-1.36	0	-1.85	0
Flnb	-1.64	0	-2.13	0
AI413582	1.42	0	0.93	0
Gm2011	1.41	6e-06	0.92	0.000605
Vps13b	-0.93	7.2e-05	-1.42	1e-06
Apoa1	2.78	0.000323	2.29	0.000279
E230013L22Rik	2.26	0.00595	1.77	0.0904
Timm9	2.01	0	1.52	0
6720468P15Rik	2.43	9.9e-05	1.95	0.00142
Ppdpf	1.62	0	1.14	0
Psmg3	1.33	0	0.85	0
Fgf18	1.32	0.00138	0.84	0.0369
Prdx4	1.31	0	0.83	7e-06
Hddc3	1.11	0	0.63	7.2e-05
Hebp2	1.11	4.1e-05	0.63	0.0268
E130008D07Rik	1.08	6.4e-05	0.6	0.0175
Dmxl2	-0.83	3e-06	-1.31	0
9530082P21Rik	0.92	0	0.44	0
Rgs10	0.9	0	0.42	6e-06
Chchd3	0.8	0	0.32	0.000292
Psma3	0.67	0	0.19	9.7e-05
Rpl34	2.11	0	1.63	0
Il1r2	1.84	0.0119	1.36	0.101
Ndufb11	1.76	0	1.28	0
Mrpl21	1.27	0	0.79	0
Vamp8	1.26	0	0.78	0.000321
Commd1	1.21	0	0.73	0
Mydgf	1.21	0	0.73	0
Spata24	1.01	0.0121	0.53	0.223
Cox7a2l	0.99	0	0.51	0
Smdt1	0.95	0	0.47	0
Mpc1	0.86	0	0.38	0
Pla2g16	0.83	0	0.35	0.00202
Ier5	0.76	0	0.28	0.0315
Ntan1	0.76	0	0.28	0.00219
Psma5	0.7	0	0.22	0.00145
Egfl7	0.57	0.0115	0.09	0.746
Myo6	-0.56	0.000682	-1.04	0
Xpo5	-0.71	0.000942	-1.19	1e-06
Chd6	-0.79	3.9e-05	-1.27	0
Atxn3	-1.35	4e-06	-1.83	0
Myh10	-0.9	0	-1.38	0
Tmem116	1.87	0	1.4	1.4e-05
Dnajc13	-1.13	0	-1.6	0
Fabp3	1.31	0	0.84	0
Sdhaf1	1.08	0	0.61	1e-06
Emc7	0.88	0	0.41	0
Rnf227	0.81	0	0.34	0
Ube2b	0.81	0	0.34	0
Slc25a26	0.55	0.00745	0.08	0.742
Cxcl14	1.8	0	1.33	0
Copz2	1.79	0	1.32	1e-06
Mrpl30	1.77	0	1.3	0
Rgcc	1.74	0	1.27	0
Rilpl2	1.71	0	1.24	0
Rpl36al	1.66	0	1.19	0
Ocel1	1.59	0	1.12	0.000267
Bcor	1.52	0	1.05	1.1e-05
Itgb3bp	1.52	5.3e-05	1.05	0.00265
Pin4	1.45	0	0.98	0
Ap2s1	1.43	0	0.96	0
Cox5a	1.27	0	0.8	0
Id1	1.26	1.3e-05	0.79	0.00347
Rpain	1.25	0	0.78	0
Mettl26	0.99	0	0.52	4e-06
Abhd11os	0.96	0.00137	0.49	0.11
Etfrf1	0.83	0	0.36	0.00101
4930506C21Rik	0.74	5.3e-05	0.27	0.138
Mycbp	0.6	0.0081	0.13	0.626
Gpr137b	0.58	0.00534	0.11	0.687
F8a	0.36	0.0329	-0.11	0.557
2310022B05Rik	-0.5	8.1e-05	-0.97	0
Mical3	-1.04	0.000465	-1.51	0
Exph5	-1.05	0.044	-1.52	0.0018
Vmn2r85	2.76	0.0333	2.29	0.15
3010001F23Rik	2.01	1.5e-05	1.54	0.0011
Ftx	-2.01	0	-2.47	0.0106
Nat8	2.43	0	1.97	0
Dpy30	1.6	0	1.14	0
Gm5089	1.6	0.00184	1.14	0.017
Tex52	-1.64	0.0366	-2.1	0.00773
Mrpl14	1.33	0	0.87	0
Ufc1	1.31	0	0.85	0
Brk1	1.11	0	0.65	0
Ubr3	-0.66	0.000649	-1.12	0
Rps6	0.91	0	0.45	0
Id3	0.8	0	0.34	0.00031
Chchd5	0.78	0.000208	0.32	0.096
Rgl2	0.53	0.044	0.07	0.804
Zfp787	0.5	0.0114	0.04	0.867
Gamt	0.44	0.0122	-0.02	0.916
D330050G23Rik	1.77	4.4e-05	1.31	0.00234
Fam173a	1.51	0	1.05	0
Lsm3	1.41	0	0.95	0
Ly6a	1.26	0.0322	0.8	0.0288
Cdc26	1.24	0	0.78	0
Slc38a3	1.23	0	0.77	4e-06
Gjd2	1.22	0.0343	0.76	0.0922
Fastkd3	0.6	0.000561	0.14	0.451
Carf	-0.53	0.0263	-0.99	3.5e-05
Dst	-0.77	0	-1.23	0
Wnt3	-1.04	0.00219	-1.5	0.00575
Dio3os	2.52	0.000262	2.07	0.000677
Dpm2	1.61	0	1.16	0
Coa6	1.58	0	1.13	0
Tlcd1	1.58	0	1.13	0
Tmem147	1.34	0	0.89	0
Ccdc80	1.31	2.6e-05	0.86	0.0144
Pdcd5	1.3	0	0.85	0
Plpp4	1.27	4.8e-05	0.82	0.021
Rpl14-ps1	1.07	0.00118	0.62	0.0343
Dleu7	1.03	0	0.58	1.9e-05
Fbxl2	0.81	0	0.36	0.00281
Uchl1	0.56	0	0.11	0.0153
Kank3	0.55	0.0452	0.1	0.779
Patl1	-0.57	0.00756	-1.02	3e-06
Zfhx4	-0.86	0.0202	-1.31	0.000281
Slc25a45	0.75	0.0324	0.3	0.505
Tcta	0.44	0.000177	-0.01	0.967
Lipt2	2.02	0	1.57	0
Pigyl	1.95	0	1.5	0
A730098A19Rik	1.81	0.021	1.36	0.0646
Zic1	1.55	0	1.1	0
Eef1akmt1	1.5	0	1.05	0
Mrpl42	1.41	0	0.96	0
1110046J04Rik	1.39	0.000532	0.94	0.0134
Smim20	1.14	0	0.69	0
Fis1	1.01	0	0.56	0
Tnfaip8	0.95	8.2e-05	0.5	0.0914
Rpl4	0.35	0.000106	-0.1	0.0562
Ints6l	-1.08	4e-06	-1.53	0
Triap1	1.38	0	0.93	0
Cdk1	1.62	0.00198	1.18	0.06
Atp6v1f	1.58	0	1.14	0
4933407K13Rik	-1.4	0.0348	-1.84	0.000762
Siva1	1.33	0	0.89	0
Timm13	1.33	0	0.89	0
2610306M01Rik	1.28	2e-06	0.84	0.000217
Fxn	1.08	0	0.64	0.000562
Brip1os	1.05	0.000231	0.61	0.0225
Banf1	1.04	0	0.6	0
Tomm22	1.03	0	0.59	0
Cyb5a	1.02	0	0.58	0
Wdr83	0.93	0	0.49	6.9e-05
Anapc16	0.68	0	0.24	0.0057
Stmn3	0.65	0	0.21	0
Armh3	-0.86	0.00069	-1.3	7e-06
Psmb1	0.75	0	0.31	0
Txnip	0.62	0.000249	0.18	0.511
Rack1	0.52	1e-05	0.08	0.469
Pip5k1b	0.51	0.0381	0.07	0.821
Abcc5	0.46	0.00111	0.02	0.933
Vegfb	0.45	6.7e-05	0.01	0.927
Aurkb	2.58	0	2.14	0.00594
Tmsb4x	1.93	0	1.49	0
Tmem208	1.65	0	1.21	0
Atp5g1	1.63	0	1.19	0
Gtf2h5	1.5	0	1.06	0
Mageh1	1.44	0	1	0
Ptgis	1.25	0.0388	0.81	0.307
G0s2	1.24	4e-06	0.8	0.00127
Dlk2	1.21	0	0.77	0.000834
Coa3	1.16	0	0.72	0
Dnajc4	1.14	0	0.7	0.000122
Rtraf	0.97	0	0.53	0
Gstm2	0.95	0.0396	0.51	0.278
Srp9	0.84	0	0.4	0
Exosc3	0.83	1.3e-05	0.39	0.062
Parp3	0.83	0.0379	0.39	0.537
Gpx3	0.61	0	0.17	0.035
A730008H23Rik	-0.71	0.0194	-1.15	3.6e-05
Gda	-0.71	2e-06	-1.15	0
Nfxl1	-1.01	0.000295	-1.45	1e-06
Herc1	-1.2	0	-1.64	0
Mga	-1.3	0	-1.74	0
Slc13a4	2.52	0	2.09	0
Mrps15	1.12	0	0.69	0
Ncf1	-1.19	0.000424	-1.62	0.000135
Gm15706	1.3	1.7e-05	0.87	0.000879
Tmem17	1.28	0	0.85	9.6e-05
Pafah1b3	1.08	0	0.65	0
Lamtor2	1.06	0	0.63	0
Tubb4b	1.06	0	0.63	0
Tmem128	1.05	0	0.62	2e-06
Urm1	1	0	0.57	3e-06
Wsb1	-0.37	0.0155	-0.8	0
Lss	-0.84	1e-06	-1.27	0
Pcna	0.86	0	0.43	7.3e-05
Fbl	0.73	1e-06	0.3	0.048
Coq9	0.35	0.00201	-0.08	0.44
Baiap3	-0.41	0.000257	-0.84	0
Snrpe	2.07	0	1.64	0
Dpm3	1.94	0	1.51	0
Dand5	1.89	0	1.46	0
Mpc2	1.76	0	1.33	0
Mzt2	1.72	0	1.29	0
Slitrk1	1.72	0	1.29	0
Csnk2b	1.13	0	0.7	0
Shd	0.97	0	0.54	0
Tmem91	0.97	0	0.54	0
Dph3	0.94	0	0.51	0
Serp2	0.7	0	0.27	1.8e-05
Bcam	0.6	0.0355	0.17	0.621
Zfp113	-1.56	0	-1.99	0
Gm17399	2.72	0	2.3	0
Tctex1d2	1.35	0	0.93	0
Ifitm3	1.34	0	0.92	1e-06
Cox19	1.33	0	0.91	0
Tmem114	1.33	0.023	0.91	0.137
Sp8	1.29	0.000967	0.87	0.0148
Mrps26	1.1	0	0.68	0
Timm8a1	0.99	0	0.57	9e-06
1190005I06Rik	0.79	0.00074	0.37	0.155
Arhgdig	0.63	0	0.21	0.00469
Naa20	0.55	0	0.13	0.0955
Adhfe1	0.54	0.00157	0.12	0.547
Gpr137b-ps	0.54	0.0126	0.12	0.637
Nudt21	0.54	0.000136	0.12	0.446
Hnrnpa2b1	0.46	0	0.04	0.641
Rnf126	0.33	0.0469	-0.09	0.629
Cops5	0.85	0	0.43	0
Ostf1	0.85	2.3e-05	0.43	0.0282
Gnas	0.73	0	0.31	0
Cyp4f15	0.71	0.023	0.29	0.469
Zcwpw1	0.62	0.0422	0.2	0.568
Acot8	0.47	0.023	0.05	0.884
Prkcsh	0.44	0.00635	0.02	0.921
Lnp1	1.78	0.0258	1.36	0.0268
Lbhd2	1.68	0	1.26	0
Ndufa5	1.65	0	1.23	0
Ndufs5	1.54	0	1.12	0
Hscb	1.38	2e-06	0.96	0.000418
2700046G09Rik	1.23	0.00814	0.81	0.104
Sdhaf4	1.19	0	0.77	0
Gal3st4	1.16	0.000129	0.74	0.016
Mrpl13	1.13	0	0.71	0
Gm19522	0.97	0.0188	0.55	0.21
Iscu	0.95	0	0.53	0
1700001L19Rik	0.94	0	0.52	0.00017
Mea1	0.82	0	0.4	0
Kmt2a	-0.97	0	-1.39	0
Prdm15	-1.1	0.000105	-1.52	1e-06
Ebi3	2.93	0	2.52	0
Gm10658	2.5	0.00263	2.09	0.00835
Abca5	-0.71	0.0428	-1.12	0.00301
Bsn	-1.44	0	-1.85	0
Gng8	1.32	0.000487	0.91	0.0223
Atp5d	1.28	0	0.87	0
B2m	1.28	0	0.87	0
Rida	1.28	0	0.87	0
Chchd2	1.23	0	0.82	0
Dnajc19	1.23	0	0.82	0
Rhebl1	1.23	7e-06	0.82	0.00122
Mrpl58	1.09	0	0.68	0
Mocs2	1.08	0	0.67	0
Dleu2	1.04	0.000315	0.63	0.0568
Sra1	1.02	0	0.61	0
Gng10	0.77	0	0.36	0.000319
Ngb	0.64	0	0.23	0.0033
Tmed3	0.64	7e-06	0.23	0.2
Hs3st4	0.62	0.000157	0.21	0.181
Fibp	0.52	3e-05	0.11	0.443
Pim3	0.44	1e-06	0.03	0.787
Mms19	-0.47	0.015	-0.88	1e-06
H2-T23	0.87	7e-06	0.46	0.0327
Tmed1	0.84	0	0.43	0.00253
Iah1	0.83	3e-06	0.42	0.0164
A830082K12Rik	0.73	0.0484	0.32	0.419
Mrps18b	0.6	2.5e-05	0.19	0.127
Wdr55	0.59	0.00391	0.18	0.392
Gstm6	0.36	0.0396	-0.05	0.836
Fam180a	2.13	5e-05	1.72	2.9e-05
1110019D14Rik	2.02	0	1.61	2e-06
Mfap4	1.72	0.0395	1.31	0.19
Cst3	1.53	0	1.12	0
9430091E24Rik	1.5	0.000541	1.09	0.0106
Fam19a4	1.46	1.5e-05	1.05	0.00468
Sat1	1.42	0	1.01	0
9430065F17Rik	1.22	0.0265	0.81	0.181
Immp2l	1.19	2.2e-05	0.78	0.00268
Fam222a	1.16	0.00795	0.75	0.0791
Gjb2	1.16	2.1e-05	0.75	0.0218
Hyi	1.15	0	0.74	0.000307
Tmem11	1.15	0	0.74	0
Dusp12	0.69	0.000161	0.28	0.167
Pole3	0.57	0.00486	0.16	0.505
Ctnnb1	-0.56	0	-0.97	0
Spns3	3.13	0.00718	2.72	0.0087
Mmp28	3.2	6.6e-05	2.8	0.00106
B230216N24Rik	2.24	0	1.84	0
Tymp	1.87	0	1.47	3.5e-05
Emc6	1.53	0	1.13	0
Atp5o	1.37	0	0.97	0
Lsm1	1.35	0	0.95	0
Gm3704	1.11	0.0394	0.71	0.321
Mrpl24	1.11	0	0.71	0
Gm10421	1.1	0.00522	0.7	0.119
Izumo4	0.81	1e-06	0.41	0.0138
Btf3	1.24	0	0.84	0
Cisd1	1.24	0	0.84	0
Nol7	1.08	0	0.68	0
Chchd6	0.93	0	0.53	0
2210408F21Rik	0.92	5e-06	0.52	0.00195
Nrip2	0.76	0	0.36	0.000101
Dnajc30	0.67	0	0.27	0.00156
Scg5	0.66	0	0.26	9e-06
Tatdn1	0.65	0.0432	0.25	0.439
Cish	0.61	0.0122	0.21	0.477
Lgals3bp	0.61	0.00306	0.21	0.462
Rpp25l	0.53	0.00171	0.13	0.467
Guk1	0.49	0	0.09	0.103
Fbxw4	0.44	0.0422	0.04	0.916
Auh	0.37	0.00026	-0.03	0.805
Msi2	-0.6	0.0122	-1	4.4e-05
Smpdl3a	0.72	1e-06	0.32	0.0451
Mrps7	0.7	0	0.3	0.000298
Gpc5	0.69	0.000213	0.29	0.16
Bud31	2.05	0	1.65	0
Elof1	1.7	0	1.3	0
Snrnp27	1.48	0	1.08	0
Gm15501	1.42	0.000534	1.02	0.00271
Smim3	1.41	0	1.01	2e-06
Bambi	1.18	0	0.78	0.0164
Dynlrb1	1.17	0	0.77	0
Nudt2	1.13	0	0.73	0
Bdnf	0.94	0	0.54	0.0123
Exoc4	-0.98	0	-1.38	0
Col6a1	-1.34	1e-06	-1.74	0
A330023F24Rik	-1.54	7e-06	-1.94	3e-06
Neat1	-2.71	0	-3.11	0
Tmem14a	1.52	0	1.13	0
Snrpd1	1.1	0	0.71	0
Serpinb1a	-0.71	0.00293	-1.1	0
Ryk	-0.72	0.000136	-1.11	0
Virma	-0.95	2.4e-05	-1.34	0
Crocc	-1.2	0.0399	-1.59	0
Ncoa6	-1.23	0	-1.62	0
Tifa	1.26	0	0.87	0.00162
Polr2g	1.01	0	0.62	0
Mrpl12	1	0	0.61	0
Sh3bgrl3	0.99	0	0.6	0
Atp5f1	0.93	0	0.54	0
Mrps18a	0.92	0	0.53	0
Pdcd6	0.9	0	0.51	0
Plp2	0.9	0.00116	0.51	0.042
Slc1a6	0.88	0.00606	0.49	0.173
2810025M15Rik	0.87	0	0.48	0.00375
Pafah1b1	0.78	0	0.39	9e-05
Rfx4	0.76	1e-05	0.37	0.0652
Orc6	0.74	1e-06	0.35	0.0175
Memo1	0.65	0.000427	0.26	0.171
Fam92a	0.63	0	0.24	0.0372
Tvp23b	0.61	9e-06	0.22	0.0775
2410004B18Rik	0.39	0.00161	0	0.988
Smyd4	0.38	0.0499	-0.01	0.971
Ccdc71	0.33	0.0153	-0.06	0.722
Pkd1	-0.54	0.00374	-0.93	0
Mtg2	0.84	1e-06	0.45	0.0208
Sparc	0.69	0	0.3	3.9e-05
Rap1a	0.58	4e-06	0.19	0.0538
Rplp0	0.58	0	0.19	0.00236
Cltc	-0.31	0.00277	-0.7	0
Psenen	2.13	0	1.74	0
Myom3	1.69	1e-06	1.3	0.00146
Supt4a	1.68	0	1.29	0
Kremen2	1.67	1e-06	1.28	2.3e-05
Cd302	1.65	0	1.26	0
Gm15201	1.51	0.00386	1.12	0.0229
Anapc11	1.49	0	1.1	0
Nedd8	1.49	0	1.1	0
Mrps12	1.42	0	1.03	0
Ptma	1.41	0	1.02	0
Hilpda	1.17	0	0.78	1.6e-05
B230118H07Rik	1.16	0	0.77	0
Fmod	1.16	0.00192	0.77	0.00117
Naxe	1.14	0	0.75	0
Nme1	0.95	0	0.56	0
Sssca1	0.94	0	0.55	1e-06
Tnip2	-1.02	8.7e-05	-1.41	0
Flna	-1.03	0.000223	-1.42	0
Kdm5a	-1.03	1e-06	-1.42	0
Gm527	-1.28	0.015	-1.67	0.00126
Dhtkd1	-1.72	0.0141	-2.11	0.00688
Tmem41a	1.6	0	1.22	0
Mrpl11	1.32	0	0.94	0
Ndufab1	1.31	0	0.93	0
Tedc1	1.29	4.4e-05	0.91	0.0213
Spag4	1.01	0.0302	0.63	0.18
Uqcc3	1	0	0.62	0
Cenpw	0.98	0.00372	0.6	0.0468
Sys1	0.92	0	0.54	0
Nudt19	0.9	0	0.52	0
Pttg1	0.88	0	0.5	0
Hsbp1	0.86	0	0.48	0
Il15ra	0.85	0.0277	0.47	0.248
Eif3i	0.78	0	0.4	0
Ptpmt1	0.74	0	0.36	0.00204
Bax	0.61	1.9e-05	0.23	0.0496
Alg5	0.52	0.0134	0.14	0.527
Lamtor1	0.48	0	0.1	0.185
Timm17b	0.48	0.00123	0.1	0.53
Rnf112	-0.26	0.0355	-0.64	0
Adsl	-0.5	0.00138	-0.88	0
Ranbp2	-0.51	0.00741	-0.89	7.9e-05
Fryl	-0.9	0.000342	-1.28	9e-06
Eci1	0.83	0	0.45	0.000923
Ntpcr	0.82	0	0.44	0.00216
Wdr6	-0.19	0.0442	-0.57	0
Timp4	2.01	0	1.63	0
Ovol2	1.48	0	1.1	0.00254
4930523C07Rik	1.44	0.000361	1.06	0.0205
Aamdc	1.17	0	0.79	0
Mcts2	1.17	0	0.79	3.6e-05
Wdr83os	1.16	0	0.78	0
Rpl6	1.13	0	0.75	0
Rapgef5	-1.1	0	-1.48	0
9530059O14Rik	-2.45	0.000122	-2.83	2e-06
Zfp133-ps	2.46	0	2.09	0
Omd	2.42	0.0109	2.05	0.000753
Cd164l2	1.8	0	1.43	8.7e-05
Cenpx	1.52	0	1.15	0
Cebpzos	1.5	0	1.13	0
Thyn1	1.37	0	1	0
1110012L19Rik	1.35	0	0.98	0
Zswim7	1.32	0	0.95	0
Ndufb8	1.09	0	0.72	0
Rtl8c	1.08	0	0.71	0
D630045J12Rik	-1.14	4e-06	-1.51	0
Plagl2	-1.73	7.9e-05	-2.1	3e-06
B230217C12Rik	0.8	0	0.43	0
Psma2	0.79	0	0.42	0
B9d2	0.68	0	0.31	0.0166
Fahd2a	0.67	0.000142	0.3	0.0701
Fam181b	0.55	0.000704	0.18	0.244
Ing4	-0.41	0.00268	-0.78	0
Cpne8	1.3	0	0.93	0
Cdpf1	1.28	0	0.91	0
Rex1bd	1.28	0	0.91	0
Coro6	1.26	1.8e-05	0.89	0.00265
Amn	1.25	1e-06	0.88	0.000228
Lsm4	1.25	0	0.88	0
Mrps11	1.25	0	0.88	0
Taf10	1.04	0	0.67	0
Bex3	1.01	0	0.64	0
Apip	0.97	0	0.6	0.000207
Naa10	0.94	0	0.57	1e-06
Aifm3	0.93	0	0.56	1.3e-05
Erp29	0.93	0	0.56	0
Atp5c1	0.76	0	0.39	0
Tmie	0.74	0.000218	0.37	0.0544
Cnbd2	0.72	0.0117	0.35	0.321
Hpcal1	0.72	0	0.35	1e-06
Itpa	0.61	0	0.24	0.00651
Cacna1g	0.6	0.0349	0.23	0.49
Mettl25	0.47	0.0363	0.1	0.722
Elavl2	0.44	0.00128	0.07	0.661
Eif2d	0.39	0.018	0.02	0.932
Rgs19	0.39	0.00483	0.02	0.92
Rabggtb	0.36	0.0138	-0.01	0.956
Psma1	0.29	0.00655	-0.08	0.262
Plpbp	-0.28	0.0137	-0.65	0
Sh3gl3	-0.35	0.00257	-0.72	0
Stx2	-0.54	0.0267	-0.91	1e-05
Pex1	-0.57	0.00727	-0.94	1.6e-05
Mcm3ap	-0.66	0.000187	-1.03	0
Wdr19	-0.83	0.00289	-1.2	3.4e-05
Tspoap1	-0.88	0	-1.25	0
Fam104a	0.82	0	0.45	0
Nr2c2ap	1.63	0	1.26	0
Emg1	1.49	0	1.12	0
Erh	1.15	0	0.78	0
Srcin1	-0.79	4.5e-05	-1.16	0
Irak1bp1	1.84	0	1.48	0
Ndufb6	1.79	0	1.43	0
Pigf	1.58	0	1.22	0
Ttc32	1.56	0	1.2	4.4e-05
A930005H10Rik	1.52	0	1.16	0
Lmo1	1.52	0	1.16	0
Htr5b	1.51	0.0124	1.15	0.0683
Mrps18c	1.49	0	1.13	0
Mettl23	1.3	0	0.94	0
Rad51	1.11	0.0062	0.75	0.145
Commd4	1.08	0	0.72	0
Il17d	1.07	0	0.71	0.000576
Nudt14	1.07	0	0.71	0.000113
Ppfibp2	-0.7	0.0228	-1.06	0.00392
Tprn	-1.24	0	-1.6	0
Col9a2	0.68	0.0485	0.32	0.369
Psma6	0.68	0	0.32	0
Alg3	0.55	0.0162	0.19	0.468
Scaf11	-0.41	0.0103	-0.77	0
Nufip2	-0.44	0.000225	-0.8	0
H2-DMb1	1.26	0.00135	0.9	0.051
9430083A17Rik	1.25	5e-06	0.89	0.000923
Mfsd2a	1.25	0	0.89	0.00021
Mrps34	1.21	0	0.85	0
Mrpl43	1.04	0	0.68	0
Ctgf	0.99	0	0.63	8.4e-05
Eef1akmt2	0.99	0	0.63	0
Xndc1	0.92	1.8e-05	0.56	0.00193
Mettl27	0.91	0.000876	0.55	0.03
0610010K14Rik	0.88	0	0.52	1.1e-05
Fgfrl1	0.85	0	0.49	0.0108
Zfyve21	0.84	0	0.48	8.9e-05
Rsph9	0.76	1e-06	0.4	0.00502
Gpr3	0.62	0.0175	0.26	0.573
Tagln3	0.62	0	0.26	0
Dhrs4	0.6	0.0344	0.24	0.401
C1galt1c1	0.59	0.000664	0.23	0.242
Mrpl39	0.59	8e-06	0.23	0.0402
Cyb5r1	0.57	0.00184	0.21	0.256
0610037L13Rik	0.53	0.000254	0.17	0.28
Slc50a1	0.47	0.00766	0.11	0.617
Gnptg	0.43	3.6e-05	0.07	0.508
Arl4d	0.3	0.0352	-0.06	0.811
Pycrl	0.3	0.0355	-0.06	0.728
Mrpl10	0.27	0.00839	-0.09	0.323
Tmem38b	-0.66	0.0426	-1.02	0.000794
4932438A13Rik	-0.82	9e-06	-1.18	0
Mosmo	-0.89	0	-1.25	0
Arrdc4	0.7	0.00236	0.34	0.156
Pcgf1	0.7	0.000511	0.34	0.104
Sstr1	0.69	0.00473	0.33	0.257
Gm11413	3.86	0.00586	3.5	0.027
Ndufb4	1.98	0	1.62	0
Chchd10	1.68	0	1.32	0
Mrpl55	1.65	0	1.29	0
Nme5	1.63	0	1.27	0
Mmgt2	1.47	0	1.11	4e-06
Prdx5	1.42	0	1.06	0
2610001J05Rik	1.38	0	1.02	0
Pard6a	1.17	0	0.81	0
1700030C10Rik	1.16	0.00393	0.8	0.0895
Cd63	1.13	0	0.77	0
Hectd4	-0.81	0	-1.17	0
Pvr	-1.53	0.0187	-1.89	0.033
Selenov	2.75	0	2.4	0
Pvalb	2.18	0	1.83	0
Gm10037	1.86	0	1.51	2.2e-05
Ap4s1	1.75	0	1.4	0
C2	1.53	0.00642	1.18	0.126
Selenom	1.48	0	1.13	0
Hspb8	1.34	0	0.99	0
Rpl28	1.34	0	0.99	0
Slc38a4	1.3	0.0401	0.95	0.085
Ndufaf5	1.11	0	0.76	0
Kirrel2	1.05	0.00442	0.7	0.18
Kcnmb4	0.93	0	0.58	0
C330018D20Rik	0.92	0	0.57	0.00059
Commd6	0.92	0	0.57	0
Irak2	-0.73	0.000189	-1.08	0
Gca	-0.76	0.000455	-1.11	1.3e-05
Zfp759	-1.14	0.00437	-1.49	3.8e-05
Zfp748	-1.23	5e-06	-1.58	0
Ltbr	0.79	0.024	0.44	0.312
Nptx2	0.77	1.9e-05	0.42	0.0946
Pdlim4	0.67	0.000207	0.32	0.137
Ubxn1	0.64	0	0.29	0.000916
Dlst	-0.32	0.00264	-0.67	0
Cfap20	1.26	0	0.91	0
Cd68	1.23	0	0.88	4.3e-05
Pstpip1	1.22	0.0158	0.87	0.0812
Pomp	1.17	0	0.82	0
Fcf1	1	0	0.65	3e-06
Cited1	0.98	2.2e-05	0.63	0.0212
Ndufs8	0.98	0	0.63	0
Abhd11	0.97	0	0.62	2e-06
Hmgn1	0.89	0	0.54	0
Clic1	0.86	0.000353	0.51	0.0321
Mettl22	0.75	0	0.4	0.000787
Hbegf	0.74	0.000203	0.39	0.136
Mrps23	0.61	2e-06	0.26	0.0213
Rasl11b	0.45	0.00239	0.1	0.58
Stmn2	0.37	9e-06	0.02	0.783
Acsbg1	0.36	0.00233	0.01	0.92
Stk40	-0.35	0.00806	-0.7	1e-06
Snn	-0.49	6e-06	-0.84	0
Elovl7	-0.56	0.00996	-0.91	6.6e-05
Gss	-0.62	0.000734	-0.97	1e-06
Pgap1	-0.68	0.0274	-1.03	0.00109
Map3k13	-0.84	0.0091	-1.19	0.000766
Pfdn6	1.64	0	1.29	0
Asphd1	1.46	0	1.11	4.5e-05
Ntsr2	1.43	0	1.08	0
Pdcd2	1.42	0	1.07	0
Psma7	1.14	0	0.79	0
Fth1	-1.04	0	-1.39	0
Agrp	3.26	0.0487	2.91	0.0686
Gm10684	3.14	0.047	2.8	0.156
Ift20	1.72	0	1.38	0
Vwc2	1.49	1.8e-05	1.15	0.000834
Cnpy2	1.48	0	1.14	0
L3hypdh	1.37	7.3e-05	1.03	0.00272
Ramp2	1.37	1e-06	1.03	2.9e-05
Ccdc107	1.31	0	0.97	0
Ndufa12	1.31	0	0.97	0
Cdk2ap2	1.29	0	0.95	0
Oaz1	1.11	0	0.77	0
Mxd3	1.08	0	0.74	2.9e-05
Fam96a	1.07	0	0.73	0
Rac3	0.91	0	0.57	0
Alkbh7	0.81	0	0.47	0.000762
Rps19bp1	0.81	0	0.47	0.00169
Slc35b1	0.81	0	0.47	2e-06
Rmdn1	0.56	0.0285	0.22	0.429
Zfp799	-1.15	0.000206	-1.49	0
Usp24	-1.27	0	-1.61	0
Idnk	0.76	7e-06	0.42	0.00635
Slc25a33	0.67	0	0.33	2e-05
Cyc1	0.65	0	0.31	0
Clta	0.63	0	0.29	8e-06
Fxyd6	0.63	0	0.29	0
Pebp1	0.53	0	0.19	0
Ank2	-0.3	0.00171	-0.64	0
Gck	1.26	0	0.92	0
Rnaset2b	1.23	2e-06	0.89	0.00489
Slco1c1	1.19	0	0.85	0.00109
Hax1	1.02	0	0.68	0
Pnoc	0.96	0	0.62	0.000102
9130401M01Rik	0.95	0	0.61	0
Frg2f1	0.95	0.00363	0.61	0.0684
Dcxr	0.87	0.000308	0.53	0.049
Higd1a	0.86	0	0.52	0
Mrpl22	0.73	0	0.39	0.00218
Particl	0.73	1e-06	0.39	0.00564
Cbr4	0.71	0.00119	0.37	0.0641
Dtx2	0.69	0.0475	0.35	0.338
Txn2	0.62	0	0.28	0
Akr1a1	0.6	0	0.26	0
Bcas1	0.59	5e-06	0.25	0.0562
Dnajc9	0.5	1.1e-05	0.16	0.122
Clns1a	0.48	0	0.14	0.0275
Hnrnpdl	0.43	0.000184	0.09	0.44
Ykt6	0.3	0.0097	-0.04	0.721
Eef2	-0.23	0.0135	-0.57	0
Tbl3	-0.4	0.0116	-0.74	1e-06
Birc5	2.36	2.1e-05	2.02	1.8e-05
Dnajc15	1.9	0	1.56	0
Fosl2	1.66	0	1.32	1e-05
A230072C01Rik	1.63	0	1.29	0
1810026B05Rik	1.4	0	1.06	0
A2ml1	1.4	0	1.06	1.4e-05
Bad	1.38	0	1.04	0
Zc3h3	-0.79	0.00666	-1.13	3.3e-05
Fam193b	-1.12	0	-1.46	0
Icam4	1.6	0.000742	1.27	0.00896
Igfbp2	1.6	0	1.27	0
Rheb	1.49	0	1.16	0
Tmbim4	1.33	0	1	0
Tomm6os	1.1	0	0.77	0.000243
Nnat	1.08	0	0.75	0
Cep44	0.92	0.00666	0.59	0.0708
Josd2	0.9	0	0.57	9e-06
Nxpe4	0.9	0.00122	0.57	0.107
Nudt5	0.81	0.000314	0.48	0.0155
Ccdc34	0.8	0.000716	0.47	0.054
Nek4	-0.6	0.000878	-0.93	0
Akap8l	-0.73	1.5e-05	-1.06	0
Cand2	-0.97	0.0117	-1.3	0.0032
Atm	-1.03	0.017	-1.36	0.0217
Simc1	-1.24	0	-1.57	0
Sh3bp2	-1.49	0.00109	-1.82	0.00117
Dnah7b	-2.65	0.011	-2.98	0.0583
Taf9	0.79	0	0.46	0
Kdelr1	0.77	0.000194	0.44	0.00825
Rpl5	0.67	0	0.34	0
Mthfsd	0.63	0.000217	0.3	0.0834
1500009L16Rik	0.52	0.000467	0.19	0.141
Inha	0.52	0.034	0.19	0.441
Hspa4	0.4	0.00178	0.07	0.678
Slc25a38	0.33	0.02	0	0.982
Uqcrc2	-0.2	0.048	-0.53	0
Rb1	-0.41	0.0359	-0.74	0.000656
3110040N11Rik	1.25	0	0.92	1e-06
Grp	1.24	0.00416	0.91	0.0224
Fezf2	1.15	0	0.82	0
Ccdc122	0.99	0.0427	0.66	0.168
Mettl8	0.99	9e-06	0.66	0.000751
Sft2d1	0.99	0	0.66	0
Coq7	0.95	0	0.62	0
Edf1	0.95	0	0.62	0
Gstm5	0.95	0	0.62	0
Pelo	0.95	4.9e-05	0.62	0.0161
Zcrb1	0.89	0	0.56	0
Gusb	0.86	1e-06	0.53	0.00319
Ppcdc	0.85	2e-06	0.52	0.00231
Mvb12a	0.83	1e-06	0.5	0.000837
2900052N01Rik	0.72	0.000104	0.39	0.0499
Cetn2	0.6	0	0.27	0.00259
Ier3ip1	0.6	0	0.27	0.00276
Ubxn11	0.48	0.0444	0.15	0.623
Naxd	0.42	0.000164	0.09	0.437
Spag7	0.29	0.00439	-0.04	0.692
Hsp90aa1	0.21	0.0179	-0.12	0.00268
Ivd	-0.39	0.000289	-0.72	0
2310069G16Rik	1.92	0	1.59	0
Rab33a	1.43	0	1.1	0
Tmem29	1.38	0	1.05	0
Tmem218	1.13	0	0.8	2e-06
Smarca1	-0.8	9.7e-05	-1.13	0
Arnt	-1.31	0	-1.64	0
Plvap	2.95	0	2.63	0
Eva1a	1.79	0	1.47	0
Ttc23	1.7	1.7e-05	1.38	0.00421
Fam57b	1.49	0	1.17	5e-06
Gm13293	1.46	0.00599	1.14	0.0241
Arl6	1.34	0	1.02	0
Tmem176b	1.34	0	1.02	0
Tmem234	1.29	0	0.97	0
Pym1	1.08	1e-06	0.76	0.000153
Rwdd1	1.05	0	0.73	0
Thoc7	1.05	0	0.73	0
Ggct	1.01	0	0.69	1e-06
Med28	0.89	0	0.57	0
Crhbp	0.81	0.000444	0.49	0.0241
Mark4	0.67	0.000524	0.35	0.0917
Cyp2j6	0.55	0.0116	0.23	0.406
Sf3b1	-0.7	0	-1.02	0
Vps13a	-0.77	0.0107	-1.09	0.000232
Ralgapa1	-0.98	0	-1.3	0
Plekha5	-1.02	0	-1.34	0
Nktr	-1.03	0	-1.35	0
Plcg1	-1.13	0	-1.45	0
Col4a1	-1.19	0.014	-1.51	0.00145
Sh3pxd2a	-1.3	0.0143	-1.62	0.00151
Dlx6os1	0.74	0	0.42	0.000411
Mrpl17	0.74	0	0.42	1e-06
Hist1h1c	0.73	0.0126	0.41	0.167
2310061I04Rik	0.66	0	0.34	0.000751
Atp1a2	0.52	0	0.2	0.00844
Atp2b4	0.52	0.00308	0.2	0.219
Mff	0.52	0	0.2	1e-06
Kxd1	0.43	0.0007	0.11	0.417
Nop16	0.38	0.00445	0.06	0.709
Asrgl1	0.23	0.0243	-0.09	0.282
Vat1l	-0.34	0.000864	-0.66	0
Pygb	-0.43	6e-06	-0.75	0
Ten1	1.25	0	0.93	0
Dnajc24	1.23	0	0.91	3e-06
Rabac1	1.19	0	0.87	0
Ssu72	1.16	0	0.84	0
Snrpd3	1	0	0.68	0
Cnih1	0.7	0	0.38	3.1e-05
Cox18	0.7	0.00022	0.38	0.0552
Pltp	0.59	0.00577	0.27	0.24
Stk35	0.49	0.0317	0.17	0.503
Snf8	0.48	1.8e-05	0.16	0.0705
Cab39l	0.47	1e-05	0.15	0.137
Aldoc	0.41	0	0.09	0.00898
Rbm3	0.41	0.00143	0.09	0.533
Zfand3	0.41	0.0111	0.09	0.609
1500011B03Rik	0.35	8e-05	0.03	0.655
Tbk1	-0.5	0.000487	-0.82	0
Hinfp	-0.89	0.00717	-1.21	0.000387
Lrrk2	-0.91	5.1e-05	-1.23	1e-06
Srebf1	-0.92	0	-1.24	0
Casz1	2.32	0	2	0
6330418K02Rik	1.42	1.3e-05	1.1	0.00348
Shld1	1.42	0	1.1	0
Epha8	-1.09	0.000761	-1.41	0.000237
Cep164	-1.31	0.0058	-1.63	0.00134
Ranbp6	-1.32	0	-1.64	0
Atr	-1.35	0.0255	-1.67	0.000324
1810021B22Rik	2	0.000433	1.69	0.00182
Alg13	1.75	0	1.44	0
Pet100	1.69	0	1.38	0
Alkal2	1.58	9.2e-05	1.27	0.013
BC031181	1.5	0	1.19	0
A830009L08Rik	1.48	0.00154	1.17	0.0403
Commd3	1.36	0	1.05	0
Cdc42ep2	1.28	0	0.97	0
Aurkaip1	1.26	0	0.95	0
Trappc1	1.12	0	0.81	0
Gtf3a	1.03	0	0.72	0
Ppib	1.01	0	0.7	0
Sec11c	0.9	0	0.59	0
Cyb5rl	0.88	0.00142	0.57	0.0262
Atp6v0b	0.81	0	0.5	0
Krt77	0.81	2.3e-05	0.5	0.00432
Mrpl16	0.55	0.00143	0.24	0.114
Oxa1l	0.55	0.000115	0.24	0.0857
Krt1	0.53	0.0308	0.22	0.45
B3gat1	0.52	0.000122	0.21	0.111
Zfp688	0.52	0.0111	0.21	0.3
BC005561	-0.7	0.00311	-1.01	4.1e-05
Ogt	-0.97	0	-1.28	0
Cul9	-1.06	0	-1.37	0
Med12	-1.54	0.00189	-1.85	0.000538
Unc50	0.77	0	0.46	1e-06
Gm10069	0.76	0.0108	0.45	0.206
Dtymk	0.75	0	0.44	0.000902
Smyd2	0.65	0	0.34	7e-06
Akain1	0.64	0.00533	0.33	0.212
Tsen15	0.63	1.2e-05	0.32	0.0203
Enkd1	0.6	0.0363	0.29	0.385
Ddrgk1	0.51	4e-05	0.2	0.0855
Dgcr6	0.51	5e-06	0.2	0.0201
Psma4	0.45	1.2e-05	0.14	0.0892
Eef1e1	0.44	0.000791	0.13	0.223
Sdhc	0.43	1e-06	0.12	0.103
Tfam	0.38	0.00827	0.07	0.672
Trmt1	0.38	0.0106	0.07	0.702
Bloc1s4	0.37	0.0281	0.06	0.79
Cryab	-0.2	0.0418	-0.51	0
Wdr5	-0.42	0.0115	-0.73	1e-06
Svbp	1.24	0	0.93	0
U2af1l4	1.24	0	0.93	0
Vmn2r29	1.19	0	0.88	7e-06
[truncated: 6,805 more rows]
