# Supplementary material for: A limbic circuit selectively links active escape to food suppression
Source: eLife. 2020 Sep 7;9:e58894. doi: 10.7554/eLife.58894 (PMC7476759; doi:10.7554/eLife.58894)
Supplement: Supplementary file 3. — Significantly enriched (TRUE) genes are shown and are sorted by fold-change (log2). [file elife-58894-supp3.xlsx]

## Sheet: FilteredGenes (1).csv
Supplementary File 3
Viral-TRAP differential gene expression data sorted by fold-change (log2).
Test ID	Gene	Locus	Status	log2(NTS-Input FPKM)	log2(NTS-IP FPKM)	log2(Ratio)	q Value	Significant
Hist1h2bj	Hist1h2bj	chr13:22043229-22043658	OK	-10	1.02	11.02	0.000117	TRUE
Rab26os	Rab26os	chr17:24528250-24528744	OK	-0.07	4.49	4.55	0.037	TRUE
Nts	Nts	chr10:102481755-102490418	OK	2.83	6.89	4.06	0.000117	TRUE
Apela	Apela	chr8:65028416-65037336	OK	-2.73	1.03	3.76	0.012	TRUE
A230065H16Rik	A230065H16Rik	chr12:111406808-111412077	OK	5.91	9.66	3.75	0.000117	TRUE
Atg7	Atg7	chr6:114643096-114860614	OK	3.26	6.89	3.63	0.000117	TRUE
Nms	Nms	chr1:38939148-38950276	OK	0.18	3.59	3.42	0.000117	TRUE
A930001A20Rik	A930001A20Rik	chr3:14971200-15002727	OK	-2.03	1.37	3.4	0.000117	TRUE
9530026F06Rik	9530026F06Rik	chr1:61378431-61395904	OK	-2.79	0.57	3.36	0.0193	TRUE
Fbxw13	Fbxw13	chr9:109179226-109195975	OK	-1.11	2.18	3.28	0.000117	TRUE
Snhg4	Snhg4	chr18:35553409-35558316	OK	2.29	5.55	3.26	0.000117	TRUE
Rpl10a	Rpl10a	chr17:28328470-28331033	OK	7.29	10.48	3.19	0.000117	TRUE
C130074G19Rik	C130074G19Rik	chr1:184871925-184883036	OK	0.97	4.14	3.17	0.000117	TRUE
Plekhs1	Plekhs1	chr19:56461636-56486729	OK	-1.8	1.37	3.17	0.000117	TRUE
Fam229a	Fam229a	chr4:129491189-129491956	OK	-1.79	1.38	3.16	0.0224	TRUE
Bhlhe23	Bhlhe23	chr2:180774380-180776900	OK	-0.66	2.46	3.12	0.000117	TRUE
Dancr	Dancr	chr5:74093082-74094336	OK	0.97	4.07	3.1	0.000117	TRUE
Prdm12	Prdm12	chr2:31640036-31655795	OK	2.75	5.84	3.1	0.000117	TRUE
Yeats2	Yeats2	chr16:20141062-20232573	OK	0.78	3.86	3.08	0.000117	TRUE
Plek2	Plek2	chr12:78888696-78906938	OK	-0.33	2.74	3.06	0.000117	TRUE
Mc3r	Mc3r	chr2:172248491-172251114	OK	0.5	3.53	3.03	0.000117	TRUE
Klrb1a	Klrb1a	chr6:128609226-128622934	OK	-3.08	-0.08	3	0.00938	TRUE
Wfdc18	Wfdc18	chr11:83709003-83711360	OK	2.52	5.49	2.97	0.000117	TRUE
2010204K13Rik	2010204K13Rik	chrX:7411816-7422988	OK	5.75	8.68	2.93	0.000117	TRUE
9330158H04Rik	9330158H04Rik	chr6:36333137-36524774	OK	-3.45	-0.54	2.91	0.0179	TRUE
Snhg10	Snhg10	chr12:105030616-105032279	OK	2.78	5.68	2.9	0.000117	TRUE
Krt14	Krt14	chr11:100203161-100207510	OK	-3.14	-0.23	2.9	0.00632	TRUE
Chrna9	Chrna9	chr5:65967123-65977486	OK	-2.5	0.37	2.87	0.000436	TRUE
Cpne8	Cpne8	chr15:90487480-90679388	OK	4.62	7.47	2.85	0.000117	TRUE
1600002D24Rik	1600002D24Rik	chr16:95831122-95929077	OK	-2.95	-0.1	2.85	0.00523	TRUE
Efcab10	Efcab10	chr12:33394853-33401269	OK	2.95	5.79	2.84	0.000117	TRUE
Ntf3	Ntf3	chr6:126101411-126166744	OK	0.68	3.49	2.81	0.000117	TRUE
Ptprcap	Ptprcap	chr19:4154645-4156710	OK	-0.72	2.08	2.79	0.000117	TRUE
Cort	Cort	chr4:149125190-149126741	OK	2.93	5.69	2.76	0.000117	TRUE
Uts2r	Uts2r	chr11:121160270-121161973	OK	-2.41	0.33	2.74	0.00159	TRUE
Aanat	Aanat	chr11:116593686-116597680	OK	-2.34	0.39	2.73	0.00103	TRUE
Lgals7	Lgals7	chr7:28864385-28866284	OK	-1.22	1.51	2.73	0.00704	TRUE
Pnoc	Pnoc	chr14:65400672-65425472	OK	3.02	5.73	2.71	0.000117	TRUE
Chrna10	Chrna10	chr7:102111265-102116713	OK	-1.64	1.06	2.7	0.000117	TRUE
Htr5b	Htr5b	chr1:121509772-121528465	OK	-0.43	2.28	2.7	0.000117	TRUE
Vsig2	Vsig2	chr9:37539254-37544205	OK	-0.83	1.88	2.7	0.000117	TRUE
Styk1	Styk1	chr6:131299143-131313827	OK	-0.72	1.97	2.69	0.000117	TRUE
Cldn3	Cldn3	chr5:134986213-135001350	OK	0.69	3.37	2.68	0.000117	TRUE
Snhg3	Snhg3	chr4:132351932-132353686	OK	4.49	7.17	2.68	0.000117	TRUE
Slc36a2	Slc36a2	chr11:55158467-55185077	OK	-3.39	-0.71	2.68	0.0032	TRUE
Bsx	Bsx	chr9:40874126-40877972	OK	-1.74	0.94	2.68	0.00337	TRUE
Myh6	Myh6	chr14:54941920-54966607	OK	-1.5	1.16	2.66	0.000117	TRUE
E130201H02Rik	E130201H02Rik	chr7:120597624-120598475	OK	-1.37	1.26	2.63	0.00205	TRUE
Epsti1	Epsti1	chr14:77904238-78002656	OK	-1.64	0.97	2.62	0.000117	TRUE
Smim18	Smim18	chr8:33731913-33777173	OK	4.73	7.34	2.61	0.000117	TRUE
D930020B18Rik	D930020B18Rik	chr10:121641700-121693914	OK	-2.35	0.25	2.6	0.000117	TRUE
Kncn	Kncn	chr4:115884399-115887964	OK	-2.31	0.28	2.59	0.0115	TRUE
Fgf16	Fgf16	chrX:105764476-105776532	OK	-0.82	1.76	2.58	0.000117	TRUE
Rab38	Rab38	chr7:88430272-88491572	OK	0	2.58	2.58	0.000117	TRUE
Nog	Nog	chr11:89300637-89302559	OK	1.29	3.86	2.57	0.000117	TRUE
Rpl26	Rpl26	chr11:68901565-68904534	OK	4.31	6.87	2.56	0.000117	TRUE
Il17b	Il17b	chr18:61687934-61692537	OK	-0.97	1.59	2.56	0.00311	TRUE
Patl2	Patl2	chr2:122120107-122186189	OK	-1.61	0.95	2.56	0.0202	TRUE
Sst	Sst	chr16:23889580-23890844	OK	8.42	10.95	2.54	0.000117	TRUE
Usmg5	Usmg5	chr19:47067747-47090625	OK	9.92	12.46	2.54	0.000117	TRUE
Wfdc3	Wfdc3	chr2:164731225-164743267	OK	-0.5	2.04	2.54	0.000227	TRUE
Kcne3	Kcne3	chr7:100176669-100184869	OK	-2.15	0.37	2.53	0.00131	TRUE
Ndufa4	Ndufa4	chr6:11900372-11907446	OK	9.86	12.35	2.5	0.000117	TRUE
Rilp	Rilp	chr11:75510093-75513166	OK	0.42	2.92	2.5	0.000117	TRUE
Ubr3	Ubr3	chr2:69897245-70024010	OK	1.13	3.63	2.5	0.000117	TRUE
Gjb3	Gjb3	chr4:127325234-127330836	OK	-2.46	0.03	2.49	0.00223	TRUE
AA465934	AA465934	chr11:83291698-83298977	OK	6.11	8.59	2.48	0.000117	TRUE
Rpl22l1	Rpl22l1	chr3:28805510-28807415	OK	6.4	8.88	2.48	0.000117	TRUE
Sdcbp2	Sdcbp2	chr2:151572622-151590005	OK	1.15	3.63	2.48	0.000117	TRUE
Kcng2	Kcng2	chr18:80294543-80364254	OK	2.87	5.34	2.47	0.000117	TRUE
Gm17660	Gm17660	chr5:104070059-104077608	OK	-1.64	0.82	2.46	0.0427	TRUE
Ndufb4	Ndufb4	chr16:37647601-37654368	OK	8.53	10.97	2.44	0.000117	TRUE
Rps12	Rps12	chr10:23785182-23787209	OK	6.11	8.54	2.43	0.000117	TRUE
Sec61g	Sec61g	chr11:16501637-16508484	OK	5.56	7.99	2.43	0.000117	TRUE
BC089491	BC089491	chr7:28284651-28291134	OK	0.2	2.61	2.41	0.000117	TRUE
Fgf15	Fgf15	chr7:144896531-144900951	OK	-2.3	0.11	2.41	0.00232	TRUE
Kynu	Kynu	chr2:43555324-43683048	OK	-3.14	-0.75	2.4	0.00249	TRUE
Tmem91	Tmem91	chr7:25669139-25675166	OK	6.36	8.75	2.39	0.000117	TRUE
5031425F14Rik	5031425F14Rik	chr2:166447450-166458770	OK	-2.96	-0.56	2.39	0.0113	TRUE
Bpifb1	Bpifb1	chr2:154190817-154220343	OK	-1.85	0.53	2.38	0.000117	TRUE
C2cd4d	C2cd4d	chr3:94362443-94364567	OK	-0.68	1.69	2.38	0.000117	TRUE
Rpl35a	Rpl35a	chr16:33056452-33060188	OK	6.85	9.23	2.38	0.000117	TRUE
Cited1	Cited1	chrX:102247377-102252181	OK	2.95	5.3	2.36	0.000117	TRUE
Cldn23	Cldn23	chr8:35824708-35826559	OK	-0.41	1.96	2.36	0.000117	TRUE
Ngb	Ngb	chr12:87097530-87102539	OK	5.62	7.98	2.36	0.000117	TRUE
Rpl38	Rpl38	chr11:114344525-114757886	OK	8.66	11.02	2.36	0.000117	TRUE
Rps25	Rps25	chr9:44407713-44418007	OK	7.08	9.44	2.36	0.000117	TRUE
Uqcrq	Uqcrq	chr11:53428947-53430831	OK	9.06	11.41	2.35	0.000117	TRUE
Timm8b	Timm8b	chr9:50603900-50625000	OK	7.85	10.18	2.34	0.000117	TRUE
Ppm1n	Ppm1n	chr7:19276806-19280049	OK	-2.19	0.15	2.34	0.00131	TRUE
Rps24	Rps24	chr14:24490680-24496146	OK	5.5	7.83	2.33	0.000117	TRUE
Tagln3	Tagln3	chr16:45711229-45724531	OK	8.88	11.21	2.33	0.000117	TRUE
Rps21	Rps21	chr2:180257378-180258444	OK	6.92	9.23	2.32	0.000117	TRUE
Sp8	Sp8	chr12:118846328-118852578	OK	-0.56	1.77	2.32	0.000117	TRUE
Zar1	Zar1	chr5:72577113-72581084	OK	0.14	2.47	2.32	0.000117	TRUE
1700010I14Rik	1700010I14Rik	chr17:8988332-9008319	OK	0.61	2.92	2.31	0.000117	TRUE
Acbd7	Acbd7	chr2:3336167-3340997	OK	0.77	3.08	2.31	0.000117	TRUE
Nop10	Nop10	chr2:112261925-112262898	OK	6.69	8.99	2.3	0.000117	TRUE
Rps27rt	Rps27rt	chr3:90212666-90213648	OK	7.4	9.71	2.3	0.000117	TRUE
Sstr5	Sstr5	chr17:25489874-25497288	OK	1.33	3.63	2.3	0.000117	TRUE
Cstf3	Cstf3	chr2:104590483-104665425	OK	4.21	6.5	2.29	0.000117	TRUE
Klk8	Klk8	chr7:43797576-43803822	OK	0.22	2.51	2.29	0.000117	TRUE
Ly6h	Ly6h	chr15:75564744-75567182	OK	7.54	9.83	2.29	0.000117	TRUE
Tcf15	Tcf15	chr2:152143608-152149096	OK	0.41	2.71	2.29	0.000117	TRUE
Atp6v1c2	Atp6v1c2	chr12:17266594-17324730	OK	1.66	3.95	2.29	0.0024	TRUE
Abracl	Abracl	chr10:18011259-18023252	OK	3.39	5.67	2.28	0.000117	TRUE
Atp5l	Atp5l	chr9:44913247-44920742	OK	8.68	10.95	2.28	0.000117	TRUE
Rpl30	Rpl30	chr15:34440505-34443276	OK	4.86	7.14	2.28	0.000117	TRUE
Rpl34-ps1	Rpl34-ps1	chr3:130726826-130730398	OK	6.89	9.17	2.28	0.000117	TRUE
Smarca2	Smarca2	chr19:26605159-26823907	OK	5.49	7.75	2.27	0.000117	TRUE
Alox12e	Alox12e	chr11:70315612-70322518	OK	-2.24	0.03	2.27	0.000436	TRUE
Apold1	Apold1	chr6:134982000-134986836	OK	0.64	2.9	2.26	0.000117	TRUE
Gm1123	Gm1123	chr9:99006964-99035690	OK	-2.94	-0.69	2.26	0.0271	TRUE
Polr2k	Polr2k	chr15:36174009-36177012	OK	6.17	8.43	2.25	0.000117	TRUE
Rps19	Rps19	chr7:24884713-24889802	OK	7.55	9.8	2.25	0.000117	TRUE
Stc2	Stc2	chr11:31359440-31370061	OK	-2.87	-0.62	2.25	0.00818	TRUE
4930579K19Rik	4930579K19Rik	chr9:98562459-98563611	OK	-0.58	1.65	2.23	0.000117	TRUE
Epb4.1l4aos	Epb4.1l4aos	chr18:33794891-33795989	OK	2.22	4.44	2.22	0.000117	TRUE
2900009J06Rik	2900009J06Rik	chr1:127729412-127774054	OK	1.41	3.63	2.21	0.000117	TRUE
Atpif1	Atpif1	chr4:132530554-132535414	OK	7.15	9.35	2.21	0.000117	TRUE
Ndufa7	Ndufa7	chr17:33824571-33838316	OK	8.27	10.48	2.21	0.000117	TRUE
Rpl34	Rpl34,Rpl34-ps1	chr3:130726826-130730398	OK	5.06	7.27	2.21	0.000117	TRUE
Rpl41	Rpl41	chr10:128548109-128549168	OK	9.07	11.29	2.21	0.000117	TRUE
BC039966	BC039966	chr4:153948454-153950476	OK	-0.05	2.16	2.21	0.00372	TRUE
BC002163	BC002163	chr4:123712709-123718186	OK	6.11	8.31	2.2	0.000117	TRUE
Rpl35	Rpl35	chr2:38998308-39005131	OK	7.74	9.94	2.2	0.000117	TRUE
Atp5e	Atp5e	chr2:174461074-174464101	OK	7.83	10.02	2.19	0.000117	TRUE
Gm12191	Gm12191	chr15:34440505-34443276	OK	6.64	8.83	2.19	0.000117	TRUE
Aldh3b2	Aldh3b2	chr19:3972327-3981665	OK	2.09	4.26	2.18	0.000117	TRUE
Stpg1	Stpg1	chr4:135495986-135537803	OK	0.34	2.52	2.18	0.000117	TRUE
Apoh	Apoh	chr11:108395296-108414396	OK	-1.56	0.61	2.18	0.0024	TRUE
Hist1h4c	Hist1h4c	chr13:23698083-23698458	OK	0.8	2.98	2.18	0.00406	TRUE
Atp5k	Atp5k	chr5:108433252-108434378	OK	8.9	11.07	2.17	0.000117	TRUE
Cartpt	Cartpt	chr13:99898482-99900683	OK	5.17	7.34	2.17	0.000117	TRUE
Trpc4	Trpc4	chr3:54156056-54318471	OK	2.15	4.33	2.17	0.000117	TRUE
2010107E04Rik	2010107E04Rik	chr12:111961375-111966977	OK	8.9	11.05	2.16	0.000117	TRUE
Uqcr11	Uqcr11	chr10:80402996-80406821	OK	10.16	12.32	2.16	0.000117	TRUE
Tnmd	Tnmd	chrX:133851007-133865578	OK	-2.09	0.06	2.15	0.00464	TRUE
1700001L19Rik	1700001L19Rik	chr13:68597438-68614231	OK	3.96	6.11	2.14	0.000117	TRUE
Grcc10	Grcc10	chr6:124739183-124741079	OK	8.8	10.94	2.14	0.000117	TRUE
Rps16	Rps16	chr7:28350688-28352698	OK	6.71	8.85	2.14	0.000117	TRUE
Vsnl1	Vsnl1	chr12:11325244-11436649	OK	7.51	9.65	2.14	0.000117	TRUE
Pam16	Pam16	chr16:4616465-4624946	OK	6.99	9.12	2.13	0.000117	TRUE
Rpl23	Rpl23	chr11:97777525-97782439	OK	6.46	8.59	2.13	0.000117	TRUE
Snhg12	Snhg12	chr4:132308677-132311024	OK	2.36	4.49	2.13	0.000117	TRUE
Spx	Spx	chr6:142413430-142419740	OK	-2.32	-0.19	2.13	0.00599	TRUE
Ndufc1	Ndufc1	chr3:51405478-51408955	OK	8.21	10.33	2.12	0.000117	TRUE
Ndufv3	Ndufv3	chr17:31520114-31531325	OK	7.81	9.93	2.12	0.000117	TRUE
1810022K09Rik	1810022K09Rik	chr3:14578670-14611256	OK	6.79	8.89	2.11	0.000117	TRUE
2410015M20Rik	2410015M20Rik	chr17:56607451-56609771	OK	6.62	8.72	2.11	0.000117	TRUE
Uqcrh	Uqcrh	chr4:116066964-116075070	OK	8.76	10.87	2.11	0.000117	TRUE
Cox7a2	Cox7a2	chr9:79755240-79759853	OK	8.19	10.3	2.1	0.000117	TRUE
Apoa1	Apoa1	chr9:46228629-46230469	OK	-0.8	1.29	2.1	0.000736	TRUE
Pdzk1ip1	Pdzk1ip1	chr4:115088707-115093894	OK	-1.27	0.84	2.1	0.00122	TRUE
Ctxn2	Ctxn2	chr2:125136691-125147841	OK	5.09	7.18	2.09	0.000117	TRUE
Mrps33	Mrps33	chr6:39801806-39810936	OK	7.05	9.13	2.09	0.000117	TRUE
Ndufb2	Ndufb2	chr6:39592582-39599471	OK	8.41	10.49	2.09	0.000117	TRUE
Rps15	Rps15	chr10:79697304-80369637	OK	7.63	9.72	2.09	0.0333	TRUE
Cebpzos	Cebpzos	chr17:78916498-78937070	OK	4.39	6.47	2.08	0.000117	TRUE
Dleu7	Dleu7	chr14:62276228-62292979	OK	4.03	6.11	2.08	0.000117	TRUE
Dnajc15	Dnajc15	chr14:77826216-77874917	OK	6.27	8.35	2.08	0.000117	TRUE
Nbl1	Nbl1	chr4:139082291-139092970	OK	5.8	7.88	2.08	0.000117	TRUE
Nme2	Nme2	chr11:93949813-93956256	OK	6.81	8.89	2.08	0.000117	TRUE
Rpl12	Rpl12	chr2:32961711-32964045	OK	6.55	8.63	2.08	0.000117	TRUE
Rpl37a	Rpl37a	chr1:72711259-72713813	OK	6.66	8.74	2.08	0.000117	TRUE
Tma7	Tma7	chr9:109077987-109082381	OK	7.29	9.37	2.08	0.000117	TRUE
Cox7c	Cox7c	chr13:86044797-86046795	OK	7.97	10.03	2.07	0.000117	TRUE
Mrpl33	Mrpl33	chr5:31613950-31622644	OK	6.79	8.86	2.07	0.000117	TRUE
Rpl36	Rpl36	chr17:56613394-56614246	OK	7.52	9.6	2.07	0.000117	TRUE
Rps28	Rps28	chr17:33823036-33824498	OK	6.95	9.03	2.07	0.000117	TRUE
Usp51	Usp51	chrX:153006468-153009459	OK	0.92	2.98	2.07	0.000117	TRUE
Ctrl	Ctrl	chr8:105931993-105933862	OK	-1.88	0.18	2.07	0.0237	TRUE
1110001J03Rik	1110001J03Rik	chr6:38534860-38539449	OK	6.54	8.6	2.06	0.000117	TRUE
Ankrd2	Ankrd2	chr19:42036037-42045110	OK	1.02	3.08	2.06	0.000117	TRUE
Mrpl41	Mrpl41	chr2:24962421-24975098	OK	4.66	6.72	2.05	0.000117	TRUE
Phf11d	Phf11d	chr14:59347406-59365490	OK	-1.67	0.38	2.05	0.000117	TRUE
Rplp2	Rplp2	chr7:141447649-141451342	OK	7.68	9.73	2.05	0.000117	TRUE
Rpl37	Rpl37	chr15:5116612-5119140	OK	5.64	7.68	2.04	0.000117	TRUE
Rpl39	Rpl39	chrX:37082519-37085184	OK	6.39	8.43	2.04	0.000117	TRUE
Sox1	Sox1	chr8:12385770-12436732	OK	1.84	3.88	2.04	0.000117	TRUE
Tceb2	Tceb2	chr17:23803186-23829109	OK	8.98	11.02	2.04	0.000117	TRUE
Acyp1	Acyp1	chr12:85272397-85280435	OK	4.43	6.45	2.03	0.000117	TRUE
Mrpl20	Mrpl20	chr4:155803617-155808829	OK	7.13	9.17	2.03	0.000117	TRUE
Msln	Msln	chr17:25748612-25754327	OK	-0.77	1.26	2.03	0.000117	TRUE
Nme1	Nme1	chr11:93958924-93968521	OK	8.67	10.71	2.03	0.000117	TRUE
Resp18	Resp18	chr1:75272201-75278380	OK	7.81	9.85	2.03	0.000117	TRUE
Rpl27	Rpl27	chr11:101442244-101445596	OK	6.46	8.5	2.03	0.000117	TRUE
Tomm7	Tomm7	chr5:23787743-24161231	OK	5.29	7.32	2.03	0.000117	TRUE
Zic2	Zic2	chr14:122475383-122480328	OK	-0.67	1.36	2.03	0.000117	TRUE
Coa3	Coa3	chr11:101277969-101278948	OK	7.9	9.92	2.02	0.000117	TRUE
Col25a1	Col25a1	chr3:130180844-130599883	OK	0.28	2.3	2.02	0.000117	TRUE
Mrpl52	Mrpl52	chr14:54426908-54429750	OK	6.01	8.04	2.02	0.000117	TRUE
Rps27a	Rps27a	chr11:29545841-29578352	OK	6.67	8.69	2.02	0.000117	TRUE
Bex2	Bex2	chrX:136066564-136068236	OK	9.7	11.7	2.01	0.000117	TRUE
Romo1	Romo1	chr2:156123636-156145794	OK	7.51	9.51	2.01	0.000117	TRUE
Slirp	Slirp	chr12:87428077-87472299	OK	7.07	9.08	2.01	0.000117	TRUE
Tmsb10	Tmsb10	chr6:72957346-72958748	OK	7.49	9.5	2.01	0.000117	TRUE
Dgkg	Dgkg	chr16:22466568-22657231	OK	5.16	7.16	2	0.000117	TRUE
Ndufab1	Ndufab1	chr7:122088043-122101848	OK	7.86	9.86	2	0.000117	TRUE
Ndufb7	Ndufb7	chr8:83566757-83571623	OK	8.48	10.48	2	0.000117	TRUE
Spcs1	Spcs1	chr14:30999825-31019131	OK	6.67	8.66	2	0.000117	TRUE
Tmsb4x	Tmsb4x	chrX:167207093-167209218	OK	10.38	12.39	2	0.000117	TRUE
Zic1	Zic1	chr9:91360344-91365799	OK	-0.43	1.56	2	0.000117	TRUE
Lsmem1	Lsmem1	chr12:40176385-40199315	OK	-1.76	0.24	2	0.00599	TRUE
E330011O21Rik	E330011O21Rik	chr16:78250862-78255454	OK	-1.58	0.42	2	0.00866	TRUE
Mcemp1	Mcemp1	chr8:3665761-3668905	OK	-2.11	-0.11	2	0.0132	TRUE
Gm561	Gm561	chr2:144594064-144595365	OK	4.87	6.86	1.99	0.000117	TRUE
Hspe1	Hspe1	chr1:55088147-55091317	OK	6.4	8.39	1.99	0.000117	TRUE
Ndufb6	Ndufb6	chr4:40270662-40279368	OK	8.43	10.42	1.99	0.000117	TRUE
Rpl17	Rpl17	chr18:75000476-75003381	OK	6.24	8.22	1.99	0.000117	TRUE
Rpp21	Rpp21	chr17:36255672-36257846	OK	6.42	8.41	1.99	0.000117	TRUE
Snhg1	Snhg1	chr19:8723486-8726326	OK	2.07	4.06	1.99	0.000117	TRUE
Atp5g1	Atp5g1	chr11:96072792-96075694	OK	8.89	10.88	1.98	0.000117	TRUE
Coa6	Coa6	chr8:126422500-126425435	OK	5.07	7.05	1.98	0.000117	TRUE
Smim4	Smim4	chr14:31019137-31128930	OK	5.06	7.04	1.98	0.000117	TRUE
Vstm2l	Vstm2l	chr2:157914652-157944719	OK	6.03	8.01	1.98	0.000117	TRUE
Cox5b	Cox5b	chr1:36691486-36693388	OK	9.6	11.56	1.96	0.000117	TRUE
Cox7b	Cox7b	chrX:106015699-106022450	OK	7.27	9.23	1.96	0.000117	TRUE
Cycs	Cycs	chr6:50562562-50566474	OK	7.41	9.36	1.96	0.000117	TRUE
Fam101a	Fam101a	chr5:125003474-125012547	OK	0.12	2.08	1.96	0.000117	TRUE
Hint2	Hint2	chr4:43654226-43656445	OK	6.55	8.51	1.96	0.000117	TRUE
Rpl19	Rpl19	chr11:98026709-98030493	OK	8.23	10.18	1.96	0.000117	TRUE
Sec61b	Sec61b	chr4:47474660-47483233	OK	6.59	8.55	1.96	0.000117	TRUE
Snhg6	Snhg6	chr1:9942024-9944118	OK	4.27	6.23	1.96	0.000117	TRUE
Spaca6	Spaca6	chr17:17830974-17839071	OK	0.25	2.21	1.96	0.000117	TRUE
2810405F15Rik	2810405F15Rik	chr2:116074547-116076096	OK	-2.17	-0.21	1.96	0.00801	TRUE
Gck	Gck	chr11:5900820-5950081	OK	1.88	3.83	1.95	0.000117	TRUE
Lhfpl5	Lhfpl5	chr17:28575718-28583593	OK	3.72	5.66	1.95	0.000117	TRUE
Ndufa11	Ndufa11	chr17:56717761-56724248	OK	5.95	7.89	1.95	0.000117	TRUE
Pld5	Pld5	chr1:175962305-176275312	OK	2.79	4.73	1.95	0.000117	TRUE
Snrpe	Snrpe	chr1:133603870-133610280	OK	6.58	8.53	1.95	0.000117	TRUE
Snrpg	Snrpg	chr6:86371539-86378902	OK	6.53	8.48	1.95	0.000117	TRUE
Tomm6	Tomm6	chr17:47686644-47694736	OK	6.19	8.15	1.95	0.000117	TRUE
Upk3a	Upk3a	chr15:85017140-85022560	OK	-0.47	1.48	1.95	0.000227	TRUE
Pnldc1	Pnldc1	chr17:12888901-12910000	OK	-1.31	0.64	1.95	0.000333	TRUE
Amn	Amn	chr12:111271110-111276426	OK	2.61	4.56	1.94	0.000117	TRUE
Fau	Fau	chr19:6057887-6059524	OK	7.65	9.59	1.94	0.000117	TRUE
Hint1	Hint1	chr11:54866437-54870496	OK	8.34	10.28	1.94	0.000117	TRUE
Mrps14	Mrps14	chr1:160195259-160201186	OK	5.3	7.24	1.94	0.000117	TRUE
Ccl22	Ccl22	chr8:94745683-94751388	OK	-1.89	0.06	1.94	0.00196	TRUE
Adra2a	Adra2a	chr19:54045181-54048982	OK	2.37	4.3	1.93	0.000117	TRUE
Atox1	Atox1	chr11:55446642-55461138	OK	7.3	9.23	1.93	0.000117	TRUE
Crhr2	Crhr2	chr6:55090048-55133016	OK	1.4	3.33	1.93	0.000117	TRUE
Fxyd2	Fxyd2	chr9:45399708-45410278	OK	3.33	5.26	1.93	0.000117	TRUE
Gchfr	Gchfr	chr2:119167787-119172389	OK	1.65	3.59	1.93	0.000117	TRUE
Ndufa6	Ndufa6	chr15:82350138-82354291	OK	8.12	10.05	1.93	0.000117	TRUE
Pfdn5	Pfdn5	chr15:102326115-102331489	OK	6.66	8.59	1.93	0.000117	TRUE
Spink8	Spink8	chr9:109816626-109826627	OK	1.69	3.61	1.93	0.000117	TRUE
Rasd1	Rasd1	chr11:59948213-59964942	OK	2.21	4.14	1.93	0.000436	TRUE
B130034C11Rik	B130034C11Rik	chr16:87496072-87504038	OK	-0.35	1.57	1.92	0.000117	TRUE
Fkbp1a	Fkbp1a	chr2:151542482-151561691	OK	10.04	11.95	1.92	0.000117	TRUE
Hfe2	Hfe2	chr3:96525184-96529216	OK	0.35	2.27	1.92	0.000117	TRUE
Inafm2	Inafm2	chr2:118745757-118748810	OK	4.84	6.75	1.92	0.000117	TRUE
Lsm7	Lsm7	chr10:80852824-80855209	OK	7.3	9.22	1.92	0.000117	TRUE
Mrps12	Mrps12	chr7:28739640-28741781	OK	7.08	9	1.92	0.000117	TRUE
Rpl36a	Rpl36a	chrX:134585653-134588062	OK	6.04	7.95	1.92	0.000117	TRUE
Abhd11os	Abhd11os	chr5:135009151-135013157	OK	4.54	6.45	1.91	0.000117	TRUE
Casz1	Casz1	chr4:148804391-148954892	OK	0.04	1.94	1.91	0.000117	TRUE
Cdh15	Cdh15	chr8:122848373-122867397	OK	1.96	3.87	1.91	0.000117	TRUE
Cox6c	Cox6c	chr15:35931975-35938246	OK	9.42	11.33	1.91	0.000117	TRUE
Galr1	Galr1	chr18:82392495-82406777	OK	-1.12	0.79	1.91	0.000117	TRUE
Gm15772	Gm15772	chr11:68901565-68904534	OK	7.52	9.43	1.91	0.000117	TRUE
Oaz1	Oaz1	chr10:80826655-80829290	OK	7.54	9.45	1.91	0.000117	TRUE
Tmem88	Tmem88	chr11:69395790-69398234	OK	2.54	4.45	1.91	0.000117	TRUE
Tspan33	Tspan33	chr6:29694213-29718558	OK	4.62	6.53	1.91	0.000117	TRUE
Cox6b1	Cox6b1	chr7:30616973-30626151	OK	9.64	11.53	1.9	0.000117	TRUE
Dusp2	Dusp2	chr2:127336158-127338377	OK	0.29	2.19	1.9	0.000117	TRUE
Hs3st2	Hs3st2	chr7:121392295-121501768	OK	4.86	6.76	1.9	0.000117	TRUE
Ndufa3	Ndufa3	chr7:3617372-3620161	OK	9.7	11.6	1.9	0.000117	TRUE
Rps29	Rps29	chr12:69157721-69159186	OK	8.16	10.06	1.9	0.000117	TRUE
Snrpd2	Snrpd2	chr7:19149837-19152726	OK	7.31	9.21	1.9	0.000117	TRUE
Uqcc2	Uqcc2	chr17:27122664-27133891	OK	8.2	10.1	1.9	0.000117	TRUE
6030408B16Rik	6030408B16Rik	chr15:101293211-101297426	OK	-2.39	-0.49	1.9	0.00664	TRUE
BB557941	BB557941	chr2:57127476-57181754	OK	-2.28	-0.39	1.9	0.026	TRUE
Fgf17	Fgf17	chr14:70636204-70642268	OK	-0.42	1.48	1.89	0.000117	TRUE
Ndufa13	Ndufa13	chr8:69894181-69903518	OK	7.54	9.43	1.89	0.000117	TRUE
Rps20	Rps20	chr4:3834472-3835600	OK	5.93	7.82	1.89	0.000117	TRUE
Hist2h2ac	Hist2h2ac	chr3:96220412-96220880	OK	0.06	1.95	1.89	0.0116	TRUE
Avpi1	Avpi1	chr19:42123274-42128993	OK	5.89	7.77	1.88	0.000117	TRUE
Cox14	Cox14	chr15:99725617-99728136	OK	7.68	9.56	1.88	0.000117	TRUE
Fam210b	Fam210b	chr2:172345576-172355749	OK	4.07	5.95	1.88	0.000117	TRUE
Gm10094	Gm10094,Sap18	chr14:57798188-57804980	OK	7.07	8.94	1.88	0.000117	TRUE
Pfdn1	Pfdn1	chr18:36403678-36454495	OK	6.51	8.39	1.88	0.000117	TRUE
Rps11	Rps11	chr7:45122387-45124389	OK	7.82	9.7	1.88	0.000117	TRUE
Mnd1	Mnd1	chr3:84087933-84155786	OK	-1.33	0.55	1.88	0.013	TRUE
Atp5j2	Atp5j2	chr5:145183705-145191592	OK	8.48	10.35	1.87	0.000117	TRUE
Bex4	Bex4	chrX:136139044-136140437	OK	5.19	7.06	1.87	0.000117	TRUE
Ccdc124	Ccdc124	chr8:70868226-70873490	OK	7.34	9.21	1.87	0.000117	TRUE
Cmtm8	Cmtm8	chr9:114789344-114844152	OK	0.76	2.63	1.87	0.000117	TRUE
Mrpl53	Mrpl53	chr6:83101515-83109932	OK	6.23	8.1	1.87	0.000117	TRUE
Ndufa12	Ndufa12	chr10:94199008-94220948	OK	8.91	10.78	1.87	0.000117	TRUE
Pet100	Pet100	chr8:3621550-3625545	OK	3.9	5.77	1.87	0.000117	TRUE
Ppp1r11	Ppp1r11	chr17:36948354-36951792	OK	6.46	8.33	1.87	0.000117	TRUE
Sncg	Sncg	chr14:34370273-34374669	OK	4.63	6.5	1.87	0.000117	TRUE
Dydc2	Dydc2	chr14:41049208-41069074	OK	0.17	2.04	1.87	0.00447	TRUE
Asb16	Asb16	chr11:102268822-102278061	OK	-2.3	-0.43	1.87	0.0194	TRUE
Arhgap6	Arhgap6	chrX:168795098-169304440	OK	2.96	4.82	1.86	0.000117	TRUE
Mrps34	Mrps34	chr17:24895119-24896273	OK	6.46	8.31	1.86	0.000117	TRUE
Spint2	Spint2	chr7:29256329-29281977	OK	5.2	7.06	1.86	0.000117	TRUE
Vax1	Vax1	chr19:59166186-59170029	OK	0.03	1.89	1.86	0.000117	TRUE
2310034G01Rik	2310034G01Rik	chr19:46348200-46348988	OK	1.53	3.38	1.85	0.000117	TRUE
Bola2	Bola2	chr7:126695999-126696693	OK	7.12	8.97	1.85	0.000117	TRUE
Nnmt	Nnmt	chr9:48591889-48605077	OK	0.24	2.09	1.85	0.000117	TRUE
Rpl9	Rpl9	chr5:65388363-65391431	OK	7.46	9.31	1.85	0.000117	TRUE
Rps10	Rps10	chr17:27630428-27635242	OK	6.33	8.17	1.85	0.000117	TRUE
Rps26	Rps26	chr10:128624528-128626506	OK	6.8	8.65	1.85	0.000117	TRUE
Uqcrb	Uqcrb	chr13:66900620-66905350	OK	9.12	10.96	1.85	0.000117	TRUE
Wbp5	Wbp5	chrX:136245079-136247139	OK	7.37	9.21	1.85	0.000117	TRUE
Gm2897	Gm2897	chr14:3049284-3076838	OK	-1.66	0.19	1.85	0.000736	TRUE
Ooep	Ooep	chr9:78376902-78378588	OK	-1.66	0.19	1.85	0.0107	TRUE
1190007I07Rik	1190007I07Rik	chr10:82619850-82623228	OK	3.53	5.37	1.84	0.000117	TRUE
3110040N11Rik	3110040N11Rik	chr7:81782186-81789453	OK	4.02	5.87	1.84	0.000117	TRUE
Bahcc1	Bahcc1	chr11:120232946-120292297	OK	-2.06	-0.22	1.84	0.000117	TRUE
Naa20	Naa20	chr2:145903240-145916425	OK	7	8.84	1.84	0.000117	TRUE
Ndufa1	Ndufa1	chrX:37187588-37191238	OK	9	10.84	1.84	0.000117	TRUE
Ndufs6	Ndufs6	chr13:73319875-73328482	OK	8.06	9.9	1.84	0.000117	TRUE
Ngfrap1	Ngfrap1	chrX:136270252-136271978	OK	8.9	10.74	1.84	0.000117	TRUE
Zic4	Zic4	chr9:91368971-91389348	OK	1.99	3.83	1.84	0.000117	TRUE
D930028M14Rik	D930028M14Rik	chr7:25152456-25156630	OK	-0.74	1.11	1.84	0.000333	TRUE
Apitd1	Apitd1	chr4:149128348-149137600	OK	2.56	4.39	1.83	0.000117	TRUE
Cxcl14	Cxcl14	chr13:56288642-56296551	OK	5.35	7.18	1.83	0.000117	TRUE
Iscu	Iscu	chr5:113772811-113778282	OK	7.95	9.78	1.83	0.000117	TRUE
L3hypdh	L3hypdh	chr12:72073427-72085313	OK	1.17	3.01	1.83	0.000117	TRUE
Ndufb11	Ndufb11	chrX:20615325-20650905	OK	7.24	9.07	1.83	0.000117	TRUE
Pgrmc1	Pgrmc1	chrX:36598224-36606079	OK	8.34	10.17	1.83	0.000117	TRUE
Rplp1	Rplp1	chr9:61913282-61914510	OK	8.18	10.02	1.83	0.000117	TRUE
Rps13	Rps13	chr7:116331506-116334190	OK	7.27	9.11	1.83	0.000117	TRUE
Uba52	Uba52	chr8:70508265-70510367	OK	8.51	10.34	1.83	0.000117	TRUE
Znhit1	Znhit1	chr5:136982200-136996646	OK	5.72	7.55	1.83	0.000117	TRUE
Fcrlb	Fcrlb	chr1:170907272-170912941	OK	0.34	2.16	1.82	0.000117	TRUE
Mrpl54	Mrpl54	chr10:81264721-81266926	OK	6.07	7.89	1.82	0.000117	TRUE
Npffr1	Npffr1	chr10:61595483-61626385	OK	2.86	4.68	1.82	0.000117	TRUE
Rerg	Rerg	chr6:137054824-137170496	OK	4.25	6.06	1.82	0.000117	TRUE
Gast	Gast	chr11:100334411-100336996	OK	0.52	2.34	1.82	0.00624	TRUE
Emc9	Emc9	chr14:55578493-55585254	OK	6.32	8.12	1.81	0.000117	TRUE
Rpl11	Rpl11	chr4:136049947-136053371	OK	6.86	8.67	1.81	0.000117	TRUE
Sf3b5	Sf3b5	chr10:13008449-13009183	OK	6.68	8.49	1.81	0.000117	TRUE
Snrnp25	Snrnp25	chr11:32205414-32208995	OK	5.37	7.18	1.81	0.000117	TRUE
Krtcap3	Krtcap3	chr5:31251705-31253197	OK	-0.73	1.08	1.81	0.00422	TRUE
Myl2	Myl2	chr5:122100979-122106854	OK	-0.75	1.06	1.81	0.0156	TRUE
Elof1	Elof1	chr9:22055459-22389206	OK	6.15	7.95	1.8	0.000117	TRUE
Glp1r	Glp1r	chr17:30901866-30936510	OK	1.73	3.54	1.8	0.000117	TRUE
Mesp2	Mesp2	chr7:79810726-79813431	OK	-1.08	0.72	1.8	0.000117	TRUE
Mrpl14	Mrpl14	chr17:45686371-45698495	OK	6.02	7.82	1.8	0.000117	TRUE
Mrps18c	Mrps18c	chr5:100798758-100804467	OK	7.06	8.86	1.8	0.000117	TRUE
Naa38	Naa38	chr11:69395790-69398234	OK	6.84	8.64	1.8	0.000117	TRUE
Ndufb5	Ndufb5	chr3:32737062-32751559	OK	7.41	9.21	1.8	0.000117	TRUE
Pfdn4	Pfdn4	chr2:170482964-170519070	OK	4.01	5.81	1.8	0.000117	TRUE
Prdx5	Prdx5	chr19:6906818-6909645	OK	8.64	10.45	1.8	0.000117	TRUE
Scand1	Scand1	chr2:156311845-156375638	OK	5.14	6.94	1.8	0.000117	TRUE
Sp9	Sp9	chr2:73271925-73275771	OK	3.62	5.42	1.8	0.000117	TRUE
C530044C16Rik	C530044C16Rik	chr6:50776114-50814894	OK	-1.8	0	1.8	0.0126	TRUE
Atp5h	Atp5h	chr11:115415696-115419919	OK	9.27	11.06	1.79	0.000117	TRUE
Cox17	Cox17	chr16:38346998-38352763	OK	7.82	9.61	1.79	0.000117	TRUE
Ndufa2	Ndufa2	chr18:36735069-36744587	OK	8.31	10.09	1.79	0.000117	TRUE
Nedd8	Nedd8	chr14:55662266-55671906	OK	8.33	10.12	1.79	0.000117	TRUE
Plekhj1	Plekhj1	chr10:80796098-80798626	OK	5.29	7.08	1.79	0.000117	TRUE
Pomp	Pomp	chr5:147860627-147875778	OK	7.94	9.73	1.79	0.000117	TRUE
Rps8	Rps8	chr4:117153835-117156132	OK	7.06	8.85	1.79	0.000117	TRUE
Txn1	Txn1	chr4:57943372-57956411	OK	6.28	8.07	1.79	0.000117	TRUE
Wipf3	Wipf3	chr6:54452882-54503768	OK	2.65	4.44	1.79	0.000117	TRUE
1810024B03Rik	1810024B03Rik	chr2:127186354-127208280	OK	-1.41	0.39	1.79	0.00422	TRUE
Arhgap40	Arhgap40	chr2:158512795-158550628	OK	-2.19	-0.4	1.79	0.00431	TRUE
Erh	Erh	chr12:80634022-80643861	OK	7.37	9.15	1.78	0.000117	TRUE
Rpl32	Rpl32	chr6:115774556-115808743	OK	6.95	8.73	1.78	0.000117	TRUE
Rpl36al	Rpl36al	chr12:69182733-69184067	OK	7.39	9.17	1.78	0.000117	TRUE
Rps23	Rps23	chr13:90923121-90924732	OK	6.98	8.76	1.78	0.000117	TRUE
Rps7	Rps7	chr12:28630846-28635953	OK	6.1	7.89	1.78	0.000117	TRUE
Sh3bgr	Sh3bgr	chr16:96200469-96228933	OK	-0.01	1.77	1.78	0.000117	TRUE
Comtd1	Comtd1	chr14:21831560-21848910	OK	2.92	4.7	1.78	0.000736	TRUE
Gm11733	Gm11733	chr11:117484367-117489014	OK	-2.41	-0.63	1.78	0.00406	TRUE
Jsrp1	Jsrp1	chr10:80808495-80813498	OK	2.92	4.69	1.77	0.000117	TRUE
Rbp4	Rbp4	chr19:38116619-38125321	OK	4.84	6.61	1.77	0.000117	TRUE
Rps15a-ps4	Rps15a-ps4	chr4:132219892-132220589	OK	-0.78	0.99	1.77	0.0138	TRUE
A430005L14Rik	A430005L14Rik	chr4:153957236-153961924	OK	5.2	6.96	1.76	0.000117	TRUE
Dpy30	Dpy30	chr17:74299473-74323944	OK	6	7.75	1.76	0.000117	TRUE
Fgl1	Fgl1	chr8:41191433-41215156	OK	0.24	2	1.76	0.000117	TRUE
Myl6	Myl6	chr10:128490860-128493825	OK	9.35	11.12	1.76	0.000117	TRUE
Snrpd1	Snrpd1	chr18:10617795-10628230	OK	6.38	8.14	1.76	0.000117	TRUE
Tctex1d2	Tctex1d2	chr16:32419701-32428892	OK	4.79	6.54	1.76	0.000117	TRUE
Trpc7	Trpc7	chr13:56773097-56895789	OK	1.88	3.64	1.76	0.000117	TRUE
Rnase6	Rnase6	chr14:51129067-51131121	OK	-0.24	1.52	1.76	0.000436	TRUE
Tmem194	Tmem194	chr10:127677064-127701047	OK	-1.01	0.75	1.76	0.00178	TRUE
Bok	Bok	chr1:93685693-93695762	OK	6.41	8.16	1.75	0.000117	TRUE
Cetn2	Cetn2	chrX:72913564-72918344	OK	5.99	7.74	1.75	0.000117	TRUE
Hspbp1	Hspbp1	chr7:4660520-4684963	OK	7.1	8.85	1.75	0.000117	TRUE
Pstpip1	Pstpip1	chr9:56089975-56128890	OK	0.2	1.95	1.75	0.000117	TRUE
Tmsb15b2	Tmsb15b2	chrX:136954987-136976874	OK	2.49	4.24	1.75	0.000117	TRUE
Atp5j	Atp5j	chr16:84827870-84863778	OK	9.84	11.58	1.74	0.000117	TRUE
Chchd1	Chchd1	chr14:20702011-20704425	OK	5.96	7.71	1.74	0.000117	TRUE
Gm1673	Gm1673	chr5:33983473-33985006	OK	6.3	8.04	1.74	0.000117	TRUE
Gm9866	Gm9866	chr12:27140795-27160516	OK	4.38	6.12	1.74	0.000117	TRUE
Pcbd2	Pcbd2	chr13:55727367-55776830	OK	4.78	6.52	1.74	0.000117	TRUE
Riiad1	Riiad1	chr3:94464984-94473591	OK	3.05	4.78	1.74	0.000117	TRUE
Rpl21	Rpl21	chr5:146832889-146837032	OK	5.85	7.6	1.74	0.000117	TRUE
Ubl5	Ubl5	chr9:20637748-20646789	OK	5.18	6.92	1.74	0.000117	TRUE
Uqcr10	Uqcr10	chr11:4701967-4704344	OK	8.97	10.72	1.74	0.000117	TRUE
Zcchc12	Zcchc12	chrX:36195903-36199158	OK	7.68	9.42	1.74	0.000117	TRUE
Slc39a5	Slc39a5	chr10:128395930-128401224	OK	-1.42	0.31	1.74	0.000637	TRUE
Atp5o	Atp5o	chr16:91925222-91931630	OK	8.95	10.68	1.73	0.000117	TRUE
Chchd2	Chchd2	chr5:129881160-129887470	OK	8.59	10.32	1.73	0.000117	TRUE
Hddc2	Hddc2	chr10:31313404-31328086	OK	5.3	7.04	1.73	0.000117	TRUE
Mrps16	Mrps16	chr14:20391230-20393555	OK	6.23	7.96	1.73	0.000117	TRUE
Sertm1	Sertm1	chr3:54897068-54915887	OK	-0.39	1.34	1.73	0.000117	TRUE
Srp14	Srp14	chr2:118475842-118479696	OK	7.86	9.59	1.73	0.000117	TRUE
Gpx2	Gpx2	chr12:76792334-76795554	OK	-2.12	-0.38	1.73	0.0317	TRUE
2010107G23Rik	2010107G23Rik	chr10:62107655-62111013	OK	5.08	6.81	1.72	0.000117	TRUE
Arpc3	Arpc3	chr5:122391927-122406178	OK	7.49	9.21	1.72	0.000117	TRUE
Atp6v0c	Atp6v0c	chr17:24163864-24169429	OK	8.13	9.84	1.72	0.000117	TRUE
Deb1	Deb1	chr9:121710388-121712921	OK	6.78	8.5	1.72	0.000117	TRUE
Fgf3	Fgf3	chr7:144838611-144843348	OK	2.2	3.92	1.72	0.000117	TRUE
Mcts1	Mcts1	chrX:38600657-38613522	OK	6.45	8.17	1.72	0.000117	TRUE
Mrpl22	Mrpl22	chr11:58171653-58179581	OK	5.46	7.18	1.72	0.000117	TRUE
Rps14	Rps14	chr18:60774595-60778546	OK	7.8	9.51	1.72	0.000117	TRUE
Srp19	Srp19	chr18:34331144-34336599	OK	6.83	8.55	1.72	0.000117	TRUE
Swi5	Swi5	chr2:32278804-32288069	OK	8.27	9.99	1.72	0.000117	TRUE
Amhr2	Amhr2	chr15:102445366-102454639	OK	-2.48	-0.75	1.72	0.0123	TRUE
Coprs	Coprs	chr8:13884787-13890271	OK	6.52	8.23	1.71	0.000117	TRUE
Ndufa5	Ndufa5	chr6:24518665-24527687	OK	8.59	10.3	1.71	0.000117	TRUE
Plvap	Plvap	chr8:71497752-71511769	OK	3.23	4.94	1.71	0.000117	TRUE
Rpl14	Rpl14	chr9:120571516-120574653	OK	6.77	8.48	1.71	0.000117	TRUE
Rps18	Rps18	chr17:33951998-33955641	OK	7.33	9.04	1.71	0.000117	TRUE
Tmem261	Tmem261	chr4:75277353-75278286	OK	5.25	6.96	1.71	0.000117	TRUE
1700023F06Rik	1700023F06Rik	chr11:103198943-103218432	OK	-0.15	1.56	1.71	0.000637	TRUE
Oxct2b	Oxct2b	chr4:123105164-123126091	OK	-1.59	0.13	1.71	0.00372	TRUE
Cd59b	Cd59b	chr2:104071009-104084957	OK	-0.44	1.27	1.71	0.00607	TRUE
E030024N20Rik	E030024N20Rik	chr19:16132830-16387453	OK	-1.69	0.02	1.71	0.0314	TRUE
1700021N21Rik	1700021N21Rik	chr4:134448764-134450171	OK	-1.94	-0.23	1.71	0.0427	TRUE
1500009L16Rik	1500009L16Rik	chr10:83722864-83762762	OK	4.88	6.59	1.7	0.000117	TRUE
Arl2	Arl2	chr19:6134388-6141137	OK	7.63	9.33	1.7	0.000117	TRUE
Arxes1	Arxes1	chrX:136033366-136034946	OK	3.92	5.62	1.7	0.000117	TRUE
Dynlrb1	Dynlrb1	chr2:155236532-155250277	OK	9.05	10.76	1.7	0.000117	TRUE
Mrpl34	Mrpl34	chr8:71464925-71465753	OK	5.73	7.42	1.7	0.000117	TRUE
Ndufb3	Ndufb3	chr1:58586598-58595948	OK	8.2	9.9	1.7	0.000117	TRUE
Sdhaf4	Sdhaf4	chr1:23995938-24005640	OK	6.14	7.84	1.7	0.000117	TRUE
Tpd52l1	Tpd52l1	chr10:31332379-31445921	OK	5.97	7.67	1.7	0.000117	TRUE
Gstp2	Gstp2	chr19:4040287-4042221	OK	-0.32	1.38	1.7	0.00574	TRUE
1700084E18Rik	1700084E18Rik	chr2:30237197-30237631	OK	-0.03	1.67	1.7	0.0327	TRUE
0610012G03Rik	0610012G03Rik	chr16:31947050-31948521	OK	6.18	7.86	1.69	0.000117	TRUE
Atp6v1f	Atp6v1f	chr6:29467782-29470509	OK	8.69	10.38	1.69	0.000117	TRUE
Hspb11	Hspb11	chr4:107253933-107279888	OK	4.43	6.12	1.69	0.000117	TRUE
Lsm5	Lsm5	chr6:56701062-56704699	OK	3.68	5.36	1.69	0.000117	TRUE
Rhov	Rhov	chr2:119269200-119271226	OK	4.08	5.77	1.69	0.000117	TRUE
Rps6	Rps6	chr4:86854098-86857367	OK	7.28	8.97	1.69	0.000117	TRUE
Snrpf	Snrpf	chr10:93540631-93605245	OK	5.43	7.12	1.69	0.000117	TRUE
Tbca	Tbca	chr13:94788942-94842899	OK	6.75	8.44	1.69	0.000117	TRUE
Timm13	Timm13	chr10:80879815-80900969	OK	6.81	8.5	1.69	0.000117	TRUE
Ndufs7	Ndufs7	chr10:79697304-80369637	OK	8.92	10.61	1.69	0.00168	TRUE
1700008O03Rik	1700008O03Rik	chr7:44360044-44375030	OK	0.84	2.52	1.68	0.000117	TRUE
1810009A15Rik	1810009A15Rik	chr19:8883877-8890759	OK	5.67	7.34	1.68	0.000117	TRUE
Edf1	Edf1	chr2:25557899-25562082	OK	8.12	9.8	1.68	0.000117	TRUE
Gp5	Gp5	chr16:30307684-30310781	OK	-0.16	1.52	1.68	0.000117	TRUE
Gsto1	Gsto1	chr19:47854988-47864788	OK	5.84	7.52	1.68	0.000117	TRUE
Nrsn2	Nrsn2	chr2:152345668-152376566	OK	7.76	9.44	1.68	0.000117	TRUE
Rpl23a	Rpl23a	chr11:78180935-78183584	OK	7.45	9.13	1.68	0.000117	TRUE
Shd	Shd	chr17:55970481-55976619	OK	4.76	6.45	1.68	0.000117	TRUE
Tcfl5	Tcfl5	chr2:180598221-180642691	OK	0	1.68	1.68	0.000537	TRUE
Bola1	Bola1	chr3:96196587-96197586	OK	5.34	7.01	1.67	0.000117	TRUE
Churc1	Churc1	chr12:76765572-76783178	OK	7.08	8.75	1.67	0.000117	TRUE
Cox16	Cox16	chr12:81358852-81532911	OK	4.31	5.99	1.67	0.000117	TRUE
Gap43	Gap43	chr16:42248560-42340651	OK	9.2	10.86	1.67	0.000117	TRUE
Magoh	Magoh	chr4:107879754-107887424	OK	4.75	6.42	1.67	0.000117	TRUE
Med31	Med31	chr11:72211723-72218450	OK	4.19	5.85	1.67	0.000117	TRUE
Pbx4	Pbx4	chr8:69832703-69872292	OK	3.46	5.13	1.67	0.000117	TRUE
Ret	Ret	chr6:118151747-118197744	OK	0.03	1.7	1.67	0.000117	TRUE
Rpl28	Rpl28	chr7:4792964-4794547	OK	7.56	9.23	1.67	0.000117	TRUE
Rps27l	Rps27l	chr9:66946117-66949509	OK	5.32	6.99	1.67	0.000117	TRUE
Stmn3	Stmn3	chr2:181306458-181314500	OK	9.34	11.01	1.67	0.000117	TRUE
Ube2t	Ube2t	chr1:134962564-134974179	OK	1.05	2.72	1.67	0.000117	TRUE
Zrsr1	Zrsr1	chr11:22899727-22982284	OK	0.47	2.14	1.67	0.000117	TRUE
Clec11a	Clec11a	chr7:44303765-44306959	OK	1.69	3.35	1.66	0.000117	TRUE
Eid2b	Eid2b	chr7:28277705-28280129	OK	3.3	4.96	1.66	0.000117	TRUE
Fam19a1	Fam19a1	chr6:96113153-96657198	OK	2.23	3.89	1.66	0.000117	TRUE
Gadd45gip1	Gadd45gip1	chr8:84832281-84840665	OK	4.81	6.47	1.66	0.000117	TRUE
Higd1b	Higd1b	chr11:102836295-102838039	OK	1.43	3.09	1.66	0.000117	TRUE
Higd2a	Higd2a	chr13:54590230-54591147	OK	7.78	9.44	1.66	0.000117	TRUE
Mif	Mif	chr10:75859352-75860250	OK	9.55	11.21	1.66	0.000117	TRUE
Mrpl12	Mrpl12	chr11:120484668-120488754	OK	6.98	8.64	1.66	0.000117	TRUE
Ndufc2	Ndufc2	chr7:97400002-97407800	OK	7.72	9.38	1.66	0.000117	TRUE
Nme5	Nme5	chr18:34562640-34579106	OK	4.44	6.1	1.66	0.000117	TRUE
Ppp1r35	Ppp1r35	chr5:137778917-137780107	OK	3.57	5.23	1.66	0.000117	TRUE
Rnasek	Rnasek	chr11:70238122-70239852	OK	8.3	9.96	1.66	0.000117	TRUE
Tmsb15b1	Tmsb15b1	chrX:136954987-136976874	OK	3.22	4.88	1.66	0.000117	TRUE
Znhit3	Znhit3	chr11:84876312-84916356	OK	6.1	7.76	1.66	0.000117	TRUE
Smco4	Smco4	chr9:15505494-15545259	OK	0.02	1.68	1.66	0.000736	TRUE
Fscn2	Fscn2	chr11:120361533-120368173	OK	-1.42	0.23	1.66	0.00285	TRUE
1700026J14Rik	1700026J14Rik	chr6:48536581-48537474	OK	-0.48	1.18	1.66	0.00523	TRUE
Defb1	Defb1	chr8:21776554-21795185	OK	-1.17	0.49	1.66	0.0136	TRUE
3300002P13Rik	3300002P13Rik	chr7:3421664-3423445	OK	0.94	2.59	1.65	0.000117	TRUE
Atp5g3	Atp5g3	chr2:73908446-73911326	OK	9.3	10.96	1.65	0.000117	TRUE
Chd3os	Chd3os	chr11:69340768-69342647	OK	7.67	9.32	1.65	0.000117	TRUE
Cxx1c	Cxx1c	chrX:53607921-53609134	OK	8.18	9.83	1.65	0.000117	TRUE
Dctn3	Dctn3	chr4:41714797-41723163	OK	8.06	9.71	1.65	0.000117	TRUE
Emc4	Emc4	chr2:112266313-112368027	OK	7.52	9.17	1.65	0.000117	TRUE
Mrps36	Mrps36	chr13:100735939-100744659	OK	6.27	7.92	1.65	0.000117	TRUE
Nt5c	Nt5c	chr11:115475676-115491814	OK	6	7.65	1.65	0.000117	TRUE
Pdcd5	Pdcd5	chr7:35641984-35647482	OK	7.03	8.68	1.65	0.000117	TRUE
Pdlim7	Pdlim7	chr13:55497486-55513446	OK	6.38	8.03	1.65	0.000117	TRUE
Rpl18	Rpl18	chr7:45718070-45720835	OK	6.87	8.51	1.65	0.000117	TRUE
Tnfrsf12a	Tnfrsf12a	chr17:23660522-23677449	OK	2.03	3.69	1.65	0.0155	TRUE
0610040B10Rik	0610040B10Rik	chr5:143329307-143332704	OK	2.33	3.96	1.64	0.000117	TRUE
Alkbh7	Alkbh7	chr17:56997338-56999336	OK	5.12	6.76	1.64	0.000117	TRUE
Bex1	Bex1	chrX:136213971-136215513	OK	7.15	8.79	1.64	0.000117	TRUE
C230004F18Rik	C230004F18Rik	chrX:61116377-61139460	OK	3.13	4.77	1.64	0.000117	TRUE
Cox4i1	Cox4i1	chr8:120668224-120674209	OK	9.97	11.61	1.64	0.000117	TRUE
Cstad	Cstad	chr2:30595043-30608945	OK	2.41	4.05	1.64	0.000117	TRUE
Fam183b	Fam183b	chr11:58792801-58801960	OK	4.37	6.01	1.64	0.000117	TRUE
Fkbp3	Fkbp3	chr12:65036333-65073938	OK	8.15	9.79	1.64	0.000117	TRUE
Gabarapl2	Gabarapl2	chr8:111940702-111952915	OK	8.36	10	1.64	0.000117	TRUE
Gng3	Gng3	chr19:8836928-8848683	OK	7.22	8.86	1.64	0.000117	TRUE
Hmgn3	Hmgn3	chr9:83109941-83146607	OK	5.8	7.44	1.64	0.000117	TRUE
Sssca1	Sssca1	chr19:5730305-5731732	OK	6.02	7.65	1.64	0.000117	TRUE
Stk19	Stk19	chr17:34823992-34836903	OK	5.12	6.76	1.64	0.000117	TRUE
Tpt1	Tpt1	chr14:75845255-75848303	OK	8.18	9.82	1.64	0.000117	TRUE
Nanos3	Nanos3	chr8:84173732-84176552	OK	-0.45	1.19	1.64	0.00913	TRUE
6330403K07Rik	6330403K07Rik	chr11:71031940-71033617	OK	8.85	10.49	1.63	0.000117	TRUE
Acot13	Acot13	chr13:24817954-24831489	OK	6.98	8.62	1.63	0.000117	TRUE
Banf1	Banf1	chr19:5364632-5371511	OK	6.96	8.59	1.63	0.000117	TRUE
Cstb	Cstb	chr10:78425669-78427622	OK	6.5	8.13	1.63	0.000117	TRUE
Hilpda	Hilpda	chr6:29272487-29275449	OK	3.73	5.36	1.63	0.000117	TRUE
Mpc2	Mpc2	chr1:165461207-165481214	OK	7.2	8.83	1.63	0.000117	TRUE
Myh7	Myh7	chr14:54968786-54994549	OK	2.72	4.35	1.63	0.000117	TRUE
Nrgn	Nrgn	chr9:37544492-37552745	OK	8.46	10.09	1.63	0.000117	TRUE
Nrip2	Nrip2	chr6:128399765-128408935	OK	4.8	6.43	1.63	0.000117	TRUE
Pi16	Pi16	chr17:29318881-29328902	OK	0.42	2.05	1.63	0.000117	TRUE
Polr2j	Polr2j	chr5:136116690-136122947	OK	6.84	8.46	1.63	0.000117	TRUE
Prkcd	Prkcd	chr14:30595353-30626208	OK	5.27	6.9	1.63	0.000117	TRUE
Prr13	Prr13	chr15:102459169-102462806	OK	6.16	7.79	1.63	0.000117	TRUE
Rpl29	Rpl29	chr9:106429538-106431567	OK	6.84	8.47	1.63	0.000117	TRUE
Rps9	Rps9	chr7:3704040-3706897	OK	7.72	9.35	1.63	0.000117	TRUE
2210013O21Rik	2210013O21Rik	chrX:153723553-153741296	OK	6.66	8.28	1.62	0.000117	TRUE
B230217C12Rik	B230217C12Rik	chr11:97840779-97843043	OK	5.81	7.43	1.62	0.000117	TRUE
Camk2n2	Camk2n2	chr16:20611600-20645915	OK	5.41	7.02	1.62	0.000117	TRUE
Dtd1	Dtd1	chr2:144599952-144768747	OK	7.16	8.77	1.62	0.000117	TRUE
Fxn	Fxn	chr19:24261452-24280586	OK	3.61	5.23	1.62	0.000117	TRUE
Med28	Med28	chr5:45520228-45529284	OK	4.93	6.55	1.62	0.000117	TRUE
Mrpl21	Mrpl21	chr19:3283046-3292837	OK	4.93	6.54	1.62	0.000117	TRUE
Polr2f	Polr2f	chr15:79141366-79151767	OK	6.99	8.61	1.62	0.000117	TRUE
Rpl24	Rpl24	chr16:55966274-55971437	OK	6.91	8.53	1.62	0.000117	TRUE
Rpl6	Rpl6	chr5:121204500-121209241	OK	6.67	8.29	1.62	0.000117	TRUE
1700012D01Rik	1700012D01Rik	chr10:127667122-127668851	OK	-0.15	1.47	1.62	0.00793	TRUE
1110038B12Rik	1110038B12Rik	chr17:34950235-34952471	OK	2.55	4.16	1.61	0.000117	TRUE
Arl6	Arl6	chr16:59613320-60605531	OK	5.5	7.11	1.61	0.000117	TRUE
Cox5a	Cox5a	chr9:57521231-57532426	OK	9.08	10.69	1.61	0.000117	TRUE
Cpa2	Cpa2	chr6:30541641-30564473	OK	1.43	3.04	1.61	0.000117	TRUE
Gtf2h5	Gtf2h5	chr17:6079827-6085485	OK	6.14	7.75	1.61	0.000117	TRUE
Ift20	Ift20	chr11:78536435-78541473	OK	6.12	7.73	1.61	0.000117	TRUE
Mkks	Mkks	chr2:136873780-137069778	OK	4.03	5.65	1.61	0.000117	TRUE
Mtfp1	Mtfp1	chr11:4091480-4095431	OK	6.04	7.65	1.61	0.000117	TRUE
Ndufv2	Ndufv2	chr17:66078794-66101559	OK	7.92	9.52	1.61	0.000117	TRUE
Pin4	Pin4	chrX:102119464-102127673	OK	6.61	8.22	1.61	0.000117	TRUE
Ripply2	Ripply2	chr9:87015536-87019916	OK	3.22	4.83	1.61	0.000117	TRUE
Sumo1	Sumo1	chr1:59639433-59670834	OK	7.61	9.22	1.61	0.000117	TRUE
Tm2d3	Tm2d3	chr7:65693416-65701913	OK	6.08	7.68	1.61	0.000117	TRUE
Tomm6os	Tomm6os	chr17:47686644-47694736	OK	2.15	3.76	1.61	0.000117	TRUE
Vps29	Vps29	chr5:122354412-122363287	OK	7.61	9.22	1.61	0.000117	TRUE
Zcchc17	Zcchc17	chr4:130316084-130359943	OK	6.6	8.21	1.61	0.000117	TRUE
Tm4sf5	Tm4sf5	chr11:70505273-70511183	OK	0.31	1.91	1.61	0.000227	TRUE
Eva1b	Eva1b	chr4:126148002-126149874	OK	-0.41	1.2	1.61	0.000637	TRUE
Atp6v0b	Atp6v0b	chr4:117884329-117887329	OK	8.29	9.89	1.6	0.000117	TRUE
Coa4	Coa4	chr7:100537099-100539812	OK	3.41	5.01	1.6	0.000117	TRUE
D8Ertd738e	D8Ertd738e	chr8:84246234-84249761	OK	7.29	8.89	1.6	0.000117	TRUE
Gm13889	Gm13889	chr2:93955809-93957100	OK	5.13	6.74	1.6	0.000117	TRUE
Lamtor2	Lamtor2	chr3:88549818-88552927	OK	7.97	9.57	1.6	0.000117	TRUE
Mcts2	Mcts2	chr2:152669460-152708668	OK	4.1	5.69	1.6	0.000117	TRUE
Mrpl55	Mrpl55	chr11:59202485-59206135	OK	5.97	7.56	1.6	0.000117	TRUE
Mrps28	Mrps28	chr3:8802145-8923857	OK	5.49	7.09	1.6	0.000117	TRUE
Unc119	Unc119	chr11:78343521-78349156	OK	5.38	6.97	1.6	0.000117	TRUE
Gm10941	Gm10941	chr10:77257772-77259223	OK	0.77	2.38	1.6	0.000333	TRUE
Cilp2	Cilp2	chr8:69880365-69887392	OK	-2.05	-0.45	1.6	0.000436	TRUE
Gm35612	Gm35612	chrX:50537388-50562598	OK	2.18	3.78	1.6	0.000834	TRUE
Ap1m2	Ap1m2	chr9:21295456-21312333	OK	-2.36	-0.76	1.6	0.0176	TRUE
1700086L19Rik	1700086L19Rik	chr12:74284275-74295950	OK	5.13	6.72	1.59	0.000117	TRUE
Armcx6	Armcx6	chrX:134748454-134751419	OK	2.1	3.69	1.59	0.000117	TRUE
Dlx1	Dlx1	chr2:71389259-71903858	OK	3.51	5.1	1.59	0.000117	TRUE
Fbxo17	Fbxo17	chr7:28716789-28738140	OK	1.52	3.11	1.59	0.000117	TRUE
Ggct	Ggct	chr6:54985094-54992867	OK	3.86	5.45	1.59	0.000117	TRUE
Gpx7	Gpx7	chr4:108400216-108406713	OK	1.92	3.5	1.59	0.000117	TRUE
Lor	Lor	chr3:92080270-92083142	OK	2.8	4.39	1.59	0.000117	TRUE
Lsm4	Lsm4	chr8:70673230-70678752	OK	6.42	8	1.59	0.000117	TRUE
Mrps18a	Mrps18a	chr17:46111003-46128908	OK	7	8.59	1.59	0.000117	TRUE
Psmb10	Psmb10	chr8:105935727-105938392	OK	5.19	6.78	1.59	0.000117	TRUE
Psmg3	Psmg3	chr5:139823593-139826843	OK	4.88	6.48	1.59	0.000117	TRUE
Psmg4	Psmg4	chr13:34162963-34178172	OK	4.74	6.33	1.59	0.000117	TRUE
Selk	Selk	chr14:29968379-29975074	OK	7.7	9.29	1.59	0.000117	TRUE
Supt4a	Supt4a	chr11:87737564-87743617	OK	6.76	8.35	1.59	0.000117	TRUE
Tceal3	Tceal3	chrX:136666374-136668377	OK	6.62	8.22	1.59	0.000117	TRUE
Gm13830	Gm13830	chr5:115301119-115320082	OK	-2.26	-0.68	1.59	0.00472	TRUE
Mospd4	Mospd4	chr18:46464933-46465816	OK	-1.88	-0.29	1.59	0.0475	TRUE
2210016L21Rik	2210016L21Rik	chr5:114942201-114948540	OK	7.08	8.66	1.58	0.000117	TRUE
BC029722	BC029722	chr2:155775343-155819203	OK	6.24	7.83	1.58	0.000117	TRUE
Calm2	Calm2	chr17:87433400-87446935	OK	11.88	13.45	1.58	0.000117	TRUE
Chchd10	Chchd10	chr10:75935572-75940672	OK	8.97	10.55	1.58	0.000117	TRUE
Ict1	Ict1	chr11:115403765-115410913	OK	6.3	7.88	1.58	0.000117	TRUE
Ier3ip1	Ier3ip1	chr18:76930026-76941614	OK	5.68	7.25	1.58	0.000117	TRUE
Ifitm10	Ifitm10	chr7:142326109-142372259	OK	2.07	3.66	1.58	0.000117	TRUE
Nr2f6	Nr2f6	chr8:71374118-71381952	OK	4.74	6.32	1.58	0.000117	TRUE
Olfm4	Olfm4	chr14:80000301-80021930	OK	-0.41	1.17	1.58	0.000117	TRUE
Pfdn6	Pfdn6	chr17:33938908-33940343	OK	6.95	8.54	1.58	0.000117	TRUE
Rpl27a	Rpl27a	chr7:109519194-109522369	OK	5.2	6.78	1.58	0.000117	TRUE
Rps17	Rps17	chr7:81342732-81345234	OK	7.37	8.95	1.58	0.000117	TRUE
S100a10	S100a10	chr3:93555116-93564645	OK	5.4	6.98	1.58	0.000117	TRUE
Slc16a11	Slc16a11	chr11:70213909-70216414	OK	2.65	4.22	1.58	0.000117	TRUE
Snrpn	Snrpn	chr7:59982500-60140219	OK	10.07	11.65	1.58	0.000117	TRUE
Synj2bp-cox16	Synj2bp-cox16	chr12:81358852-81532911	OK	4.44	6.02	1.58	0.000117	TRUE
Grrp1	Grrp1	chr4:134251109-134254106	OK	0.01	1.59	1.58	0.000333	TRUE
Akr1c18	Akr1c18	chr13:4132626-4150631	OK	-0.25	1.33	1.58	0.000932	TRUE
1500011K16Rik	1500011K16Rik	chr2:127791376-127792488	OK	4.99	6.56	1.57	0.000117	TRUE
AK010878	AK010878	chr12:102739829-102757810	OK	3.86	5.43	1.57	0.000117	TRUE
Acacb	Acacb	chr5:114165517-114250758	OK	-1.38	0.19	1.57	0.000117	TRUE
Cthrc1	Cthrc1	chr15:39076931-39087119	OK	3.14	4.72	1.57	0.000117	TRUE
Fabp3	Fabp3	chr4:130308777-130315463	OK	7.46	9.03	1.57	0.000117	TRUE
Fam173a	Fam173a	chr17:25786579-25792394	OK	6.24	7.81	1.57	0.000117	TRUE
Magohb	Magohb	chr6:131284388-131293244	OK	3.46	5.03	1.57	0.000117	TRUE
Mrps21	Mrps21	chr3:95862651-95870619	OK	7.69	9.26	1.57	0.000117	TRUE
Ndufa8	Ndufa8	chr2:36036333-36049292	OK	8.41	9.98	1.57	0.000117	TRUE
Rpl13	Rpl13	chr8:123102349-123105242	OK	8.54	10.12	1.57	0.000117	TRUE
Srp9	Srp9	chr1:182124736-182132415	OK	6.89	8.46	1.57	0.000117	TRUE
Timm10	Timm10	chr2:84827020-84830213	OK	6.52	8.1	1.57	0.000117	TRUE
Ccna1	Ccna1	chr3:55045468-55055055	OK	-0.62	0.96	1.57	0.000227	TRUE
BC029214	BC029214	chr2:25459487-25461094	OK	5.36	6.92	1.56	0.000117	TRUE
Dlx5	Dlx5	chr6:6877800-6882068	OK	4.2	5.76	1.56	0.000117	TRUE
Fahd1	Fahd1	chr17:24848895-24850302	OK	4.15	5.71	1.56	0.000117	TRUE
Hypk	Hypk	chr2:121457087-121458440	OK	7.39	8.96	1.56	0.000117	TRUE
Pdcd10	Pdcd10	chr3:75516489-75556852	OK	5.01	6.57	1.56	0.000117	TRUE
Pinx1	Pinx1	chr14:63860311-63919859	OK	1.51	3.07	1.56	0.000117	TRUE
Rgs10	Rgs10	chr7:128373624-128418172	OK	6.16	7.71	1.56	0.000117	TRUE
Timm10b	Timm10b	chr7:105640539-105641845	OK	5.24	6.8	1.56	0.000117	TRUE
D030068K23Rik	D030068K23Rik	chr8:109075221-109253639	OK	-1.77	-0.21	1.56	0.000333	TRUE
Rsph6a	Rsph6a	chr7:19054686-19074447	OK	-2.32	-0.76	1.56	0.00793	TRUE
2310036O22Rik	2310036O22Rik	chr8:85026832-85030286	OK	6.32	7.88	1.55	0.000117	TRUE
5830454E08Rik	5830454E08Rik	chr9:120577330-120578073	OK	1.46	3.01	1.55	0.000117	TRUE
Anapc13	Anapc13	chr9:102626295-102634244	OK	6.52	8.07	1.55	0.000117	TRUE
Ensa	Ensa	chr3:95624979-95632117	OK	8.3	9.84	1.55	0.000117	TRUE
Hsbp1	Hsbp1	chr8:119344537-119348929	OK	8.86	10.42	1.55	0.000117	TRUE
Mrpl23	Mrpl23	chr7:142533116-142540742	OK	7	8.55	1.55	0.000117	TRUE
Ndufs5	Ndufs5	chr4:123712709-123718186	OK	7.01	8.57	1.55	0.000117	TRUE
Nhp2	Nhp2	chr11:51619772-51635896	OK	6.37	7.92	1.55	0.000117	TRUE
Nop16	Nop16	chr13:54584190-54590074	OK	4.79	6.34	1.55	0.000117	TRUE
Oaz1-ps	Oaz1-ps	chr10:80826655-80829290	OK	9.68	11.23	1.55	0.000117	TRUE
Pld6	Pld6	chr11:59783892-59787657	OK	1.2	2.74	1.55	0.000117	TRUE
Polr2l	Polr2l	chr7:141471859-141475153	OK	5.12	6.67	1.55	0.000117	TRUE
Rnf128	Rnf128	chrX:139563339-139673145	OK	3.47	5.02	1.55	0.000117	TRUE
Rnf208	Rnf208	chr2:25242928-25244261	OK	6.9	8.45	1.55	0.000117	TRUE
Shfm1	Shfm1	chr6:6558274-6578658	OK	7.83	9.38	1.55	0.000117	TRUE
Tceal5	Tceal5	chrX:136200950-136203851	OK	5.23	6.78	1.55	0.000117	TRUE
Tsen15	Tsen15	chr1:152370735-152386682	OK	5.03	6.57	1.55	0.000117	TRUE
Wdr83os	Wdr83os	chr8:85080962-85082339	OK	6.16	7.7	1.55	0.000117	TRUE
Rnf151	Rnf151	chr17:24715839-24718057	OK	-0.19	1.36	1.55	0.000932	TRUE
C1d	C1d	chr11:17257617-17269176	OK	4.66	6.2	1.54	0.000117	TRUE
Dctn6	Dctn6	chr8:34090420-34108712	OK	6.95	8.5	1.54	0.000117	TRUE
Gstm7	Gstm7	chr3:107926333-107931745	OK	5.69	7.24	1.54	0.000117	TRUE
Igfbpl1	Igfbpl1	chr4:45809506-45826827	OK	-0.59	0.96	1.54	0.000117	TRUE
Prorsd1	Prorsd1	chr11:29511756-29515033	OK	1.19	2.73	1.54	0.000117	TRUE
Psme1	Psme1	chr14:55578493-55585254	OK	6.13	7.68	1.54	0.000117	TRUE
Rps19bp1	Rps19bp1	chr15:80260613-80264306	OK	5.31	6.84	1.54	0.000117	TRUE
Rps5	Rps5	chr7:12922310-12926686	OK	7.12	8.66	1.54	0.000117	TRUE
Sod1	Sod1	chr16:90220741-90226324	OK	7.72	9.27	1.54	0.000117	TRUE
Ssna1	Ssna1	chr2:25271038-25272418	OK	6.59	8.13	1.54	0.000117	TRUE
Ssu72	Ssu72	chr4:155704814-155733873	OK	6.86	8.4	1.54	0.000117	TRUE
Tceal6	Tceal6	chrX:135208685-135210687	OK	6.21	7.75	1.54	0.000117	TRUE
Trappc2l	Trappc2l	chr8:122611625-122615591	OK	7.69	9.23	1.54	0.000117	TRUE
Tmsb15l	Tmsb15l	chrX:136954987-136976874	OK	2.13	3.67	1.54	0.000932	TRUE
Gm10364	Gm10364	chr14:55038461-55042976	OK	-1.89	-0.35	1.54	0.0228	TRUE
0610011F06Rik	0610011F06Rik	chr17:25875499-25877163	OK	5.71	7.24	1.53	0.000117	TRUE
Aprt	Aprt	chr8:122574636-122576907	OK	5.87	7.4	1.53	0.000117	TRUE
Cisd3	Cisd3	chr11:97685951-97688625	OK	5.66	7.19	1.53	0.000117	TRUE
Cox20	Cox20	chr1:178319152-178322693	OK	6.06	7.59	1.53	0.000117	TRUE
Cyth2	Cyth2	chr7:45806636-45814316	OK	5.79	7.32	1.53	0.000117	TRUE
Gm4349	Gm4349	chr3:95427348-95431085	OK	0.49	2.02	1.53	0.000117	TRUE
Malsu1	Malsu1	chr6:49073794-49084717	OK	4.22	5.75	1.53	0.000117	TRUE
Mpg	Mpg	chr11:32226504-32267707	OK	3.59	5.12	1.53	0.000117	TRUE
Mrps11	Mrps11	chr7:78783130-78792988	OK	5.33	6.86	1.53	0.000117	TRUE
Mtch1	Mtch1	chr17:29332075-29347904	OK	9.16	10.68	1.53	0.000117	TRUE
Myeov2	Myeov2	chr1:92637144-92641985	OK	8.21	9.74	1.53	0.000117	TRUE
Pop5	Pop5	chr5:115235850-115240970	OK	5.99	7.53	1.53	0.000117	TRUE
Rnf138rt1	Rnf138rt1	chrX:163760138-163761332	OK	1.41	2.93	1.53	0.000117	TRUE
3110009E18Rik	3110009E18Rik	chr1:120121186-120188189	OK	1.88	3.41	1.53	0.000333	TRUE
Atp5d	Atp5d	chr10:79697304-80369637	OK	8.6	10.13	1.53	0.00214	TRUE
Asgr1	Asgr1	chr11:70054123-70057895	OK	-0.78	0.75	1.53	0.00276	TRUE
1110059E24Rik	1110059E24Rik	chr19:21597312-21652791	OK	5.23	6.76	1.52	0.000117	TRUE
Arhgap25	Arhgap25	chr6:87458544-87533259	OK	2.23	3.75	1.52	0.000117	TRUE
Cdpf1	Cdpf1	chr15:85806971-85811697	OK	4.86	6.38	1.52	0.000117	TRUE
Chac2	Chac2	chr11:30954397-31102704	OK	3.95	5.47	1.52	0.000117	TRUE
Clpp	Clpp	chr17:56990263-56996371	OK	7.11	8.63	1.52	0.000117	TRUE
Commd4	Commd4	chr9:57155040-57158299	OK	6.7	8.22	1.52	0.000117	TRUE
Fam98b	Fam98b	chr2:117249738-117271540	OK	2.36	3.88	1.52	0.000117	TRUE
Gm14204	Gm14204	chr2:158595471-158610723	OK	3.74	5.26	1.52	0.000117	TRUE
Gpx3	Gpx3	chr11:54902853-54910382	OK	5.88	7.4	1.52	0.000117	TRUE
Isca2	Isca2	chr12:84773269-84775089	OK	6.57	8.09	1.52	0.000117	TRUE
Lyrm1	Lyrm1	chr7:119895860-119916756	OK	4.46	5.98	1.52	0.000117	TRUE
Pnma3	Pnma3	chrX:73064786-73068191	OK	0.16	1.68	1.52	0.000117	TRUE
Rab26	Rab26	chr17:24529053-24533747	OK	5.81	7.34	1.52	0.000117	TRUE
Rpl15	Rpl15	chr14:18267822-18270986	OK	5.98	7.5	1.52	0.000117	TRUE
Ap2s1	Ap2s1	chr7:16738443-16749290	OK	7.96	9.47	1.51	0.000117	TRUE
Atp2b4	Atp2b4	chr1:133702673-133753747	OK	1.31	2.82	1.51	0.000117	TRUE
Aurkaip1	Aurkaip1	chr4:155831268-155833098	OK	6.26	7.76	1.51	0.000117	TRUE
Bloc1s1	Bloc1s1	chr10:128919913-128923524	OK	7.03	8.54	1.51	0.000117	TRUE
Ccdc109b	Ccdc109b	chr3:129914959-129970206	OK	2.61	4.12	1.51	0.000117	TRUE
Cd3eap	Cd3eap	chr7:19345070-19359483	OK	3.35	4.86	1.51	0.000117	TRUE
Etohi1	Etohi1	chr2:178023283-178035859	OK	4.34	5.85	1.51	0.000117	TRUE
Gskip	Gskip	chr12:105685351-105703057	OK	5.48	6.99	1.51	0.000117	TRUE
Ndufb8	Ndufb8	chr19:44550253-44555415	OK	9.8	11.32	1.51	0.000117	TRUE
Necab2	Necab2	chr8:119446718-119472635	OK	7.49	9	1.51	0.000117	TRUE
Nol8	Nol8	chr13:49653077-49679016	OK	1.35	2.86	1.51	0.000117	TRUE
Rps3	Rps3	chr7:99477896-99483709	OK	6.38	7.88	1.51	0.000117	TRUE
Zfp428	Zfp428	chr7:24507086-24515682	OK	5.59	7.1	1.51	0.000117	TRUE
Sprr1a	Sprr1a	chr3:92483953-92485881	OK	-1.33	0.18	1.51	0.0421	TRUE
0610010K14Rik	0610010K14Rik	chr11:70235203-70237914	OK	5.68	7.18	1.5	0.000117	TRUE
2310045N01Rik	2310045N01Rik	chr8:70139498-70167488	OK	5.61	7.11	1.5	0.000117	TRUE
AI413582	AI413582	chr17:27563768-27565727	OK	6.98	8.48	1.5	0.000117	TRUE
Aard	Aard	chr15:52040106-52045722	OK	1.72	3.23	1.5	0.000117	TRUE
Atp6v0c-ps2	Atp6v0c-ps2	chr17:24163864-24169429	OK	9.67	11.17	1.5	0.000117	TRUE
Commd1	Commd1	chr11:22899727-22982284	OK	5.83	7.33	1.5	0.000117	TRUE
Cox7a2l	Cox7a2l	chr17:83501916-83514333	OK	6.97	8.47	1.5	0.000117	TRUE
Dmrtc1a	Dmrtc1a	chrX:102903220-102908687	OK	4.4	5.9	1.5	0.000117	TRUE
Lin7b	Lin7b	chr7:45339125-45370564	OK	7.14	8.64	1.5	0.000117	TRUE
Lrif1	Lrif1	chr3:106684986-106736576	OK	2.7	4.21	1.5	0.000117	TRUE
Lypd1	Lypd1	chr1:125676995-125912214	OK	6.35	7.85	1.5	0.000117	TRUE
Mea1	Mea1	chr17:46674550-46705002	OK	7.32	8.82	1.5	0.000117	TRUE
Mrpl2	Mrpl2	chr17:46646247-46650132	OK	6.26	7.76	1.5	0.000117	TRUE
Mrpl36	Mrpl36	chr13:73331008-73332178	OK	5.93	7.42	1.5	0.000117	TRUE
Mrps17	Mrps17	chr5:129715527-129718691	OK	5.63	7.13	1.5	0.000117	TRUE
Pin1	Pin1	chr9:20652129-20666584	OK	5.72	7.22	1.5	0.000117	TRUE
Rbm3	Rbm3	chrX:8138974-8147963	OK	5.8	7.3	1.5	0.000117	TRUE
Rsph9	Rsph9	chr17:46129276-46144198	OK	4.95	6.46	1.5	0.000117	TRUE
Serp2	Serp2	chr14:76532811-76556889	OK	7.63	9.13	1.5	0.000117	TRUE
Tceb1	Tceb1	chr1:16642764-16656865	OK	6.51	8.02	1.5	0.000117	TRUE
Tmem256	Tmem256	chr11:69838524-69839558	OK	7.19	8.69	1.5	0.000117	TRUE
2310009A05Rik	2310009A05Rik	chr9:73039717-73042775	OK	5.15	6.64	1.49	0.000117	TRUE
Ap4s1	Ap4s1	chr12:51608540-51738939	OK	5.94	7.43	1.49	0.000117	TRUE
Arl6ip4	Arl6ip4	chr5:124116107-124118195	OK	5.99	7.48	1.49	0.000117	TRUE
B9d1	B9d1	chr11:61505171-61512927	OK	4.91	6.4	1.49	0.000117	TRUE
C230014O12Rik	C230014O12Rik	chr2:34018288-34107735	OK	-0.25	1.24	1.49	0.000117	TRUE
Chchd6	Chchd6	chr6:89383145-89595652	OK	7.14	8.64	1.49	0.000117	TRUE
Ing2	Ing2	chr8:47667177-47675159	OK	3.26	4.74	1.49	0.000117	TRUE
Izumo4	Izumo4	chr10:80702692-80705382	OK	4.66	6.15	1.49	0.000117	TRUE
Mroh7	Mroh7	chr4:106680416-106727930	OK	0.57	2.06	1.49	0.000117	TRUE
Mrpl27	Mrpl27	chr11:94653790-94660087	OK	7.37	8.86	1.49	0.000117	TRUE
Mrps24	Mrps24	chr11:5703982-5707699	OK	5.43	6.92	1.49	0.000117	TRUE
Myl12b	Myl12b	chr17:70973962-70990516	OK	9.09	10.58	1.49	0.000117	TRUE
Rangrf	Rangrf	chr11:68968130-68975185	OK	4.56	6.05	1.49	0.000117	TRUE
Rgs19	Rgs19	chr2:181688418-181693977	OK	4.98	6.48	1.49	0.000117	TRUE
Smdt1	Smdt1	chr15:82346045-82349062	OK	8.45	9.94	1.49	0.000117	TRUE
Ssr4	Ssr4	chrX:73787027-73790828	OK	5.95	7.44	1.49	0.000117	TRUE
Gm8773	Gm8773	chr5:5573798-5576203	OK	-1.14	0.34	1.49	0.0101	TRUE
2610042L04Rik	2610042L04Rik	chr14:4334762-4354687	OK	-0.36	1.12	1.48	0.000117	TRUE
Cisd1	Cisd1	chr10:71330493-71344849	OK	7.91	9.39	1.48	0.000117	TRUE
Cox8a	Cox8a	chr19:7215157-7217616	OK	10.2	11.67	1.48	0.000117	TRUE
Cyb561d2	Cyb561d2	chr9:107539010-107541865	OK	3.8	5.28	1.48	0.000117	TRUE
Fopnl	Fopnl	chr16:14299243-14317332	OK	5.83	7.3	1.48	0.000117	TRUE
Lamtor5	Lamtor5	chr3:107278857-107284081	OK	6.99	8.47	1.48	0.000117	TRUE
Praf2	Praf2	chrX:7728570-7731063	OK	7.17	8.66	1.48	0.000117	TRUE
Rpa3	Rpa3	chr6:8255935-8259141	OK	3.63	5.11	1.48	0.000117	TRUE
Slc14a2	Slc14a2	chr18:78146143-78596950	OK	0.68	2.16	1.48	0.000117	TRUE
Tomm5	Tomm5	chr4:45105209-45108113	OK	6.69	8.17	1.48	0.000117	TRUE
Use1	Use1	chr8:71366847-71369732	OK	5.6	7.08	1.48	0.000117	TRUE
Bvht	Bvht	chr18:61639652-61665538	OK	0.73	2.21	1.48	0.00431	TRUE
Cirbp	Cirbp	chr10:79697304-80369637	OK	6.95	8.42	1.48	0.0473	TRUE
Acrbp	Acrbp	chr6:125049926-125063265	OK	0.53	2	1.47	0.000117	TRUE
Asphd1	Asphd1	chr7:126946007-126949581	OK	3.28	4.75	1.47	0.000117	TRUE
Bud31	Bud31	chr5:145140396-145167104	OK	5.01	6.48	1.47	0.000117	TRUE
Cep112	Cep112	chr11:108425265-108860615	OK	-0.05	1.42	1.47	0.000117	TRUE
Cnpy2	Cnpy2	chr10:128322458-128327187	OK	5.56	7.03	1.47	0.000117	TRUE
Eef1b2	Eef1b2	chr1:63176830-63180486	OK	5.72	7.19	1.47	0.000117	TRUE
Fam110a	Fam110a	chr2:151969395-151980219	OK	3.03	4.5	1.47	0.000117	TRUE
Fam155a	Fam155a	chr8:9206009-9771023	OK	2.84	4.31	1.47	0.000117	TRUE
2017-03-03	2017-03-03	chr18:56761715-56925548	OK	0.74	2.21	1.47	0.000117	TRUE
Ndufaf2	Ndufaf2	chr13:108052588-108158625	OK	4.79	6.27	1.47	0.000117	TRUE
Ndufs8	Ndufs8	chr19:3908862-3912774	OK	8.19	9.67	1.47	0.000117	TRUE
Ptms	Ptms	chr6:124913674-124917946	OK	5.86	7.33	1.47	0.000117	TRUE
Rnaseh2c	Rnaseh2c	chr19:5601872-5602959	OK	4.66	6.12	1.47	0.000117	TRUE
Rps15a	Rps15a	chr7:118104375-118116147	OK	2.12	3.59	1.47	0.000117	TRUE
Rwdd1	Rwdd1	chr10:33996554-34019616	OK	5.77	7.24	1.47	0.000117	TRUE
Sft2d1	Sft2d1	chr17:8283812-8327442	OK	5.95	7.42	1.47	0.000117	TRUE
Snrnp27	Snrnp27	chr6:86675168-86684491	OK	6.09	7.56	1.47	0.000117	TRUE
Syt5	Syt5	chr7:4539764-4546567	OK	7.24	8.7	1.47	0.000117	TRUE
Tmem14a	Tmem14a	chr1:21218574-21230167	OK	5.14	6.62	1.47	0.000117	TRUE
Trpt1	Trpt1	chr19:6996130-7019469	OK	3.46	4.93	1.47	0.000117	TRUE
Uchl3	Uchl3	chr14:101653966-101696125	OK	6.3	7.77	1.47	0.000117	TRUE
Nme3	Nme3	chr17:24896499-24936977	OK	5.31	6.79	1.47	0.00178	TRUE
Il1r2	Il1r2	chr1:40076211-40125226	OK	-1.06	0.41	1.47	0.0393	TRUE
Araf	Araf	chrX:20848542-20920918	OK	7.98	9.44	1.46	0.000117	TRUE
Chchd4	Chchd4	chr6:91464275-91473423	OK	6.74	8.21	1.46	0.000117	TRUE
Dad1	Dad1	chr14:54235484-54253929	OK	7.73	9.19	1.46	0.000117	TRUE
Eef1e1	Eef1e1	chr13:38645690-38659028	OK	5.68	7.14	1.46	0.000117	TRUE
Higd1a	Higd1a	chr9:121848559-121858000	OK	6.99	8.45	1.46	0.000117	TRUE
Kbtbd11	Kbtbd11	chr8:15011024-15033332	OK	2.03	3.49	1.46	0.000117	TRUE
Mrpl32	Mrpl32	chr13:14610300-14613037	OK	5.17	6.63	1.46	0.000117	TRUE
Pfn1	Pfn1	chr11:70651846-70654650	OK	8.21	9.67	1.46	0.000117	TRUE
Pip5k1b	Pip5k1b	chr19:24294795-24555827	OK	2.14	3.6	1.46	0.000117	TRUE
Pop7	Pop7	chr5:137501438-137502429	OK	5.88	7.34	1.46	0.000117	TRUE
Ppih	Ppih	chr4:119300009-119320523	OK	4.61	6.07	1.46	0.000117	TRUE
Psenen	Psenen	chr7:30561865-30563184	OK	6.73	8.19	1.46	0.000117	TRUE
Rgs2	Rgs2	chr1:143999337-144004149	OK	5.64	7.1	1.46	0.000117	TRUE
Rpl13a	Rpl13a	chr7:45125562-45128745	OK	6.58	8.04	1.46	0.000117	TRUE
Wbscr17	Wbscr17	chr5:130874950-131307522	OK	-0.32	1.14	1.46	0.000117	TRUE
Retn	Retn	chr8:3655769-3659818	OK	0.86	2.32	1.46	0.00355	TRUE
Zfp819	Zfp819	chr7:43607168-43618279	OK	-2.21	-0.75	1.46	0.0116	TRUE
Aamp	Aamp	chr1:74279839-74284738	OK	7.96	9.41	1.45	0.000117	TRUE
Ak6	Ak6	chr13:100651342-100666415	OK	4.73	6.19	1.45	0.000117	TRUE
Avpr1a	Avpr1a	chr10:122448498-122453453	OK	0.31	1.76	1.45	0.000117	TRUE
Caly	Caly	chr7:140069879-140082548	OK	8.11	9.56	1.45	0.000117	TRUE
Chchd7	Chchd7	chr4:3938887-3951382	OK	5.46	6.91	1.45	0.000117	TRUE
Fdx1l	Fdx1l	chr9:21067513-21092008	OK	6.23	7.69	1.45	0.000117	TRUE
Hpcal1	Hpcal1	chr12:17690813-17791926	OK	5.73	7.19	1.45	0.000117	TRUE
Isl1	Isl1	chr13:116298269-116309688	OK	3.57	5.02	1.45	0.000117	TRUE
Metrnl	Metrnl	chr11:121702426-121717389	OK	2.22	3.67	1.45	0.000117	TRUE
Phpt1	Phpt1	chr2:25573430-25574871	OK	6.89	8.34	1.45	0.000117	TRUE
Polr2g	Polr2g	chr19:8793128-8798557	OK	7.12	8.56	1.45	0.000117	TRUE
Stub1	Stub1	chr17:25829042-25833361	OK	8.1	9.55	1.45	0.000117	TRUE
Timm17a	Timm17a	chr1:135301534-135313737	OK	7.41	8.86	1.45	0.000117	TRUE
F12	F12	chr13:55417957-55426804	OK	-0.94	0.52	1.45	0.00103	TRUE
Ccr10	Ccr10	chr11:101172997-101175443	OK	-1.43	0.02	1.45	0.0059	TRUE
Etaa1os	Etaa1os	chr11:17953969-17959581	OK	0.66	2.11	1.45	0.0116	TRUE
Prss41	Prss41	chr17:23836784-23844156	OK	-0.98	0.47	1.45	0.0127	TRUE
1700021F05Rik	1700021F05Rik	chr10:43525120-43540994	OK	5.47	6.9	1.44	0.000117	TRUE
2210016F16Rik	2210016F16Rik	chr13:58380045-58385225	OK	3.56	5	1.44	0.000117	TRUE
2900076A07Rik	2900076A07Rik	chr7:81523549-81531498	OK	2	3.44	1.44	0.000117	TRUE
Bhlha9	Bhlha9	chr11:76672469-76673676	OK	0.96	2.4	1.44	0.000117	TRUE
D330023K18Rik	D330023K18Rik	chr2:31151048-31152291	OK	4.37	5.81	1.44	0.000117	TRUE
Dach2	Dach2	chrX:113297509-113836386	OK	-0.79	0.65	1.44	0.000117	TRUE
Eif1	Eif1	chr11:100319995-100322096	OK	9.88	11.32	1.44	0.000117	TRUE
Fgd5	Fgd5	chr6:91987109-92076005	OK	0.62	2.06	1.44	0.000117	TRUE
H2afz	H2afz	chr3:137864486-137866922	OK	8.32	9.76	1.44	0.000117	TRUE
Hist3h2a	Hist3h2a	chr11:58954684-58955192	OK	6.17	7.62	1.44	0.000117	TRUE
Med29	Med29	chr7:28385246-28392690	OK	4.17	5.61	1.44	0.000117	TRUE
Mrpl13	Mrpl13	chr15:55534094-55557312	OK	6.19	7.63	1.44	0.000117	TRUE
Mrps26	Mrps26	chr2:130563756-130565394	OK	6.77	8.21	1.44	0.000117	TRUE
Thy1	Thy1	chr9:44043383-44048579	OK	3.33	4.78	1.44	0.000117	TRUE
Tmem199	Tmem199	chr11:78507054-78512168	OK	6.29	7.72	1.44	0.000117	TRUE
Sbspon	Sbspon	chr1:15853861-15892722	OK	-1.43	0.01	1.44	0.000637	TRUE
Sp5	Sp5	chr2:70474922-70477726	OK	-1.37	0.06	1.44	0.00168	TRUE
Hspb3	Hspb3	chr13:113662895-113663676	OK	-0.05	1.39	1.44	0.00664	TRUE
1500011B03Rik	1500011B03Rik	chr5:114808195-114813976	OK	7.91	9.34	1.43	0.000117	TRUE
1810043H04Rik	1810043H04Rik	chr11:120098933-120100424	OK	6.45	7.88	1.43	0.000117	TRUE
4930526I15Rik	4930526I15Rik	chr9:124423250-124424856	OK	2.12	3.55	1.43	0.000117	TRUE
Acyp2	Acyp2	chr11:30505991-30649396	OK	4.59	6.03	1.43	0.000117	TRUE
Apopt1	Apopt1	chr12:111713268-111755055	OK	5.58	7.01	1.43	0.000117	TRUE
Arpc5l	Arpc5l	chr2:39008138-39015872	OK	7.3	8.72	1.43	0.000117	TRUE
Cdkn2d	Cdkn2d	chr9:21288463-21291209	OK	6.82	8.25	1.43	0.000117	TRUE
Emc6	Emc6	chr11:73175502-73177042	OK	5.67	7.1	1.43	0.000117	TRUE
Lsm2	Lsm2	chr17:34981853-34985893	OK	4.28	5.71	1.43	0.000117	TRUE
Lsm3	Lsm3	chr6:91516034-91522620	OK	5.52	6.95	1.43	0.000117	TRUE
Ranbp1	Ranbp1	chr16:18239978-18248694	OK	7.39	8.81	1.43	0.000117	TRUE
Rpl31	Rpl31	chr1:39367850-39478747	OK	6.29	7.71	1.43	0.000117	TRUE
Rpl8	Rpl8	chr15:76904070-76906318	OK	6.9	8.33	1.43	0.000117	TRUE
Scoc	Scoc	chr8:83434491-83458396	OK	7.28	8.71	1.43	0.000117	TRUE
Slc9a3r2	Slc9a3r2	chr17:24639281-24650305	OK	5.48	6.91	1.43	0.000117	TRUE
Tmem160	Tmem160	chr7:16452778-16455490	OK	6.32	7.75	1.43	0.000117	TRUE
Ufm1	Ufm1	chr3:53853375-53863807	OK	3.32	4.75	1.43	0.000117	TRUE
Zfp628	Zfp628	chr7:4915216-4922003	OK	-0.11	1.32	1.43	0.000117	TRUE
Pigyl	Pigyl	chr9:22055459-22389206	OK	6	7.42	1.43	0.000333	TRUE
Gm10037	Gm10037	chr13:67831105-67843292	OK	1.86	3.29	1.43	0.000436	TRUE
2310033P09Rik	2310033P09Rik	chr11:59208360-59210734	OK	4.25	5.67	1.42	0.000117	TRUE
2810001G20Rik	2810001G20Rik	chr11:64079483-64083259	OK	4.04	5.46	1.42	0.000117	TRUE
6330403A02Rik	6330403A02Rik	chr1:180432372-180483504	OK	2.31	3.73	1.42	0.000117	TRUE
BC031181	BC031181	chr18:75005899-75009933	OK	7.45	8.87	1.42	0.000117	TRUE
Bcas2	Bcas2	chr3:103171710-103179154	OK	6.33	7.75	1.42	0.000117	TRUE
Cks1b	Cks1b	chr3:89415471-89418291	OK	2.63	4.06	1.42	0.000117	TRUE
Cnih3	Cnih3	chr1:181352627-181460641	OK	5.23	6.65	1.42	0.000117	TRUE
Dcun1d5	Dcun1d5	chr9:7184565-7207031	OK	5.87	7.29	1.42	0.000117	TRUE
Fam103a1	Fam103a1	chr7:81762952-81769490	OK	6.93	8.36	1.42	0.000117	TRUE
Fam162a	Fam162a	chr16:36043843-36071515	OK	6.54	7.96	1.42	0.000117	TRUE
H2afj	H2afj	chr6:136808247-136810074	OK	4.78	6.2	1.42	0.000117	TRUE
Hmgn1	Hmgn1	chr16:96121587-96127725	OK	6.78	8.19	1.42	0.000117	TRUE
Idnk	Idnk	chr13:58157648-58164693	OK	3.86	5.28	1.42	0.000117	TRUE
Meig1	Meig1	chr2:3409042-3422648	OK	2.6	4.02	1.42	0.000117	TRUE
Mien1	Mien1	chr11:98412483-98438988	OK	7.44	8.86	1.42	0.000117	TRUE
Mrps15	Mrps15	chr4:126046927-126055536	OK	5.64	7.06	1.42	0.000117	TRUE
Msantd1	Msantd1	chr5:34915914-34923839	OK	0.77	2.19	1.42	0.000117	TRUE
N6amt2	N6amt2	chr14:57549597-57571569	OK	6.35	7.77	1.42	0.000117	TRUE
Ndufaf6	Ndufaf6	chr4:11051045-11076205	OK	4.32	5.74	1.42	0.000117	TRUE
Ndufb10	Ndufb10	chr17:24722066-24724388	OK	8.84	10.26	1.42	0.000117	TRUE
Pstk	Pstk	chr7:131371145-131387838	OK	3.86	5.29	1.42	0.000117	TRUE
Ptrh1	Ptrh1	chr2:32775820-32784405	OK	2.19	3.61	1.42	0.000117	TRUE
Snhg20	Snhg20	chr11:117076782-117078955	OK	3.86	5.28	1.42	0.000117	TRUE
Tmem208	Tmem208	chr8:105326363-105329057	OK	5.25	6.67	1.42	0.000117	TRUE
Trmt112	Trmt112	chr19:6909697-6921808	OK	5.99	7.4	1.42	0.000117	TRUE
Cdca7l	Cdca7l	chr12:117843860-118199043	OK	-0.89	0.52	1.42	0.000932	TRUE
4921507P07Rik	4921507P07Rik	chr6:50566642-50596590	OK	-1.59	-0.17	1.42	0.0131	TRUE
2810025M15Rik	2810025M15Rik	chr1:157135182-157420236	OK	4.18	5.59	1.41	0.000117	TRUE
Cetn4	Cetn4	chr3:37308626-37312446	OK	3.26	4.67	1.41	0.000117	TRUE
Dynll1	Dynll1	chr5:115297109-115300990	OK	7.87	9.29	1.41	0.000117	TRUE
Hprt	Hprt	chrX:52988077-53021660	OK	7.83	9.24	1.41	0.000117	TRUE
Mllt11	Mllt11	chr3:95181765-95236424	OK	7.26	8.67	1.41	0.000117	TRUE
Morn2	Morn2	chr17:80238303-80297476	OK	5	6.41	1.41	0.000117	TRUE
Mrpl24	Mrpl24	chr3:87919543-87930195	OK	4.76	6.17	1.41	0.000117	TRUE
Oxld1	Oxld1	chr11:120456603-120458063	OK	3.43	4.84	1.41	0.000117	TRUE
Pawr	Pawr	chr10:108332188-108414391	OK	1.53	2.94	1.41	0.000117	TRUE
Pdcd2	Pdcd2	chr17:15521574-15527301	OK	4.3	5.71	1.41	0.000117	TRUE
Polr2i	Polr2i	chr7:30232073-30236765	OK	5.27	6.68	1.41	0.000117	TRUE
Psmb6	Psmb6	chr11:70525356-70527858	OK	8.28	9.7	1.41	0.000117	TRUE
Rassf10	Rassf10	chr7:112953961-112957458	OK	0.56	1.97	1.41	0.000117	TRUE
Rpl18a	Rpl18a	chr8:70894721-70897443	OK	7.49	8.9	1.41	0.000117	TRUE
Rps4x	Rps4x	chrX:102184942-102188371	OK	6.84	8.25	1.41	0.000117	TRUE
Sec11a	Sec11a	chr7:80915378-80947550	OK	5	6.4	1.41	0.000117	TRUE
Tfpt	Tfpt	chr7:3620323-3629929	OK	4.53	5.94	1.41	0.000117	TRUE
Ube2v2	Ube2v2	chr16:15550985-15594518	OK	4.61	6.01	1.41	0.000117	TRUE
4933405L10Rik	4933405L10Rik	chr8:105708302-105710168	OK	-1.33	0.08	1.41	0.0233	TRUE
Adat2	Adat2	chr10:13523841-13563376	OK	0.55	1.96	1.41	0.0277	TRUE
A330050F15Rik	A330050F15Rik	chr17:69439325-69489233	OK	2.15	3.55	1.4	0.000117	TRUE
Acta1	Acta1	chr8:123891757-123894775	OK	3.22	4.63	1.4	0.000117	TRUE
Anapc11	Anapc11	chr11:120598420-120608198	OK	4.59	5.99	1.4	0.000117	TRUE
B830017H08Rik	B830017H08Rik	chr16:17833118-17835019	OK	2.58	3.98	1.4	0.000117	TRUE
Cst6	Cst6	chr19:5344704-5349574	OK	0.58	1.98	1.4	0.000117	TRUE
Ddx25	Ddx25	chr9:35541847-35558470	OK	6.04	7.44	1.4	0.000117	TRUE
Dnajb3	Dnajb3	chr1:88055410-88220002	OK	1.84	3.24	1.4	0.000117	TRUE
Ftsj2	Ftsj2	chr5:140327673-140331898	OK	4.03	5.44	1.4	0.000117	TRUE
Hcfc1r1	Hcfc1r1	chr17:23660522-23677449	OK	6.26	7.65	1.4	0.000117	TRUE
Hsf4	Hsf4	chr8:105269800-105275845	OK	2.53	3.93	1.4	0.000117	TRUE
Lamtor3	Lamtor3	chr3:137918554-137928762	OK	6.1	7.5	1.4	0.000117	TRUE
Mblac1	Mblac1	chr5:138194313-138195621	OK	2.36	3.77	1.4	0.000117	TRUE
Nudt14	Nudt14	chr12:112934732-112942118	OK	4.24	5.64	1.4	0.000117	TRUE
Pcbd1	Pcbd1	chr10:61089330-61094329	OK	4.57	5.97	1.4	0.000117	TRUE
Tmem11	Tmem11	chr11:60864451-60879038	OK	5.84	7.24	1.4	0.000117	TRUE
Tmem147	Tmem147	chr7:30727700-30729534	OK	6.89	8.29	1.4	0.000117	TRUE
Tmem14c	Tmem14c	chr13:41016249-41022582	OK	5.59	6.99	1.4	0.000117	TRUE
Tmie	Tmie	chr9:110866045-110880083	OK	2.27	3.67	1.4	0.000117	TRUE
Ubald1	Ubald1	chr16:4874778-4879851	OK	6.41	7.81	1.4	0.000117	TRUE
Ubb	Ubb	chr11:62551503-62553212	OK	10.49	11.89	1.4	0.000117	TRUE
Ube2s	Ube2s	chr7:4808013-4812340	OK	6.93	8.33	1.4	0.000117	TRUE
Zfp444	Zfp444	chr7:6172512-6193104	OK	4.02	5.41	1.4	0.000117	TRUE
l7Rn6	l7Rn6	chr7:89918684-89941204	OK	6.04	7.44	1.4	0.000117	TRUE
Tmem184a	Tmem184a	chr5:139804951-139814283	OK	-2.11	-0.71	1.4	0.0152	TRUE
Ghrh	Ghrh	chr2:157329495-157346655	OK	0.39	1.79	1.4	0.0227	TRUE
Polr2e	Polr2e	chr10:79697304-80369637	OK	6.94	8.34	1.4	0.0479	TRUE
Atp6v1g1	Atp6v1g1	chr4:63544764-63550701	OK	7.76	9.15	1.39	0.000117	TRUE
Bmyc	Bmyc	chr2:25706878-25707719	OK	7.31	8.7	1.39	0.000117	TRUE
Ccdc58	Ccdc58	chr16:36071659-36092118	OK	3.25	4.64	1.39	0.000117	TRUE
Dand5	Dand5	chr8:84815404-84832265	OK	4.45	5.84	1.39	0.000117	TRUE
Klhdc8a	Klhdc8a	chr1:132298625-132307357	OK	3.51	4.9	1.39	0.000117	TRUE
Naca	Naca	chr10:128035345-128048637	OK	7.14	8.53	1.39	0.000117	TRUE
Ndufs4	Ndufs4	chr13:114287794-114388094	OK	5.99	7.38	1.39	0.000117	TRUE
Nsg1	Nsg1	chr5:38039229-38159467	OK	8.09	9.48	1.39	0.000117	TRUE
Pmvk	Pmvk	chr3:89459117-89469009	OK	5.74	7.13	1.39	0.000117	TRUE
Selm	Selm	chr11:3514701-3517351	OK	7.02	8.41	1.39	0.000117	TRUE
Spint1	Spint1	chr2:119237359-119249513	OK	2.42	3.82	1.39	0.000117	TRUE
Thyn1	Thyn1	chr9:26999676-27030094	OK	5.88	7.27	1.39	0.000117	TRUE
Gm3696	Gm3696	chr14:7083024-7105457	OK	-0.66	0.73	1.39	0.000537	TRUE
2900005J15Rik	2900005J15Rik	chr5:25100974-25103007	OK	-1.03	0.36	1.39	0.00223	TRUE
Arxes2	Arxes2	chrX:135993819-135995359	OK	5.45	6.83	1.38	0.000117	TRUE
Cotl1	Cotl1	chr8:119809213-119840579	OK	2.96	4.33	1.38	0.000117	TRUE
Dctpp1	Dctpp1	chr7:127256958-127260667	OK	4.78	6.16	1.38	0.000117	TRUE
Dnajc19	Dnajc19	chr3:34020078-34081354	OK	6.34	7.71	1.38	0.000117	TRUE
Dpm3	Dpm3	chr3:89266460-89267079	OK	4.9	6.28	1.38	0.000117	TRUE
Exosc6	Exosc6	chr8:111056338-111057664	OK	4.18	5.55	1.38	0.000117	TRUE
Fam133b	Fam133b	chr5:3543832-3570546	OK	2.99	4.37	1.38	0.000117	TRUE
Kcnip1	Kcnip1	chr11:33629340-33993193	OK	5.67	7.06	1.38	0.000117	TRUE
Prkrip1	Prkrip1	chr5:136180356-136198954	OK	3.77	5.15	1.38	0.000117	TRUE
Psmb3	Psmb3	chr11:97703433-97713500	OK	8.28	9.65	1.38	0.000117	TRUE
Ralyl	Ralyl	chr3:13471654-14182287	OK	6.38	7.76	1.38	0.000117	TRUE
Rpl3	Rpl3	chr15:80077780-80083406	OK	7.96	9.34	1.38	0.000117	TRUE
Rps4l	Rps4l	chr6:148047415-148444352	OK	5.1	6.48	1.38	0.000117	TRUE
Rrp7a	Rrp7a	chr15:83100204-83122801	OK	7	8.38	1.38	0.000117	TRUE
Shisa6	Shisa6	chr11:66211724-66526126	OK	-1.24	0.13	1.38	0.000117	TRUE
Stra13	Stra13	chr11:120710940-120713767	OK	4.43	5.8	1.38	0.000117	TRUE
Cpa6	Cpa6	chr1:10324718-10865874	OK	-0.99	0.39	1.38	0.00178	TRUE
9330179D12Rik	9330179D12Rik	chr6:127125708-127212419	OK	1.76	3.15	1.38	0.0176	TRUE
4833417C18Rik	4833417C18Rik	chr11:95858816-95861046	OK	-1.55	-0.17	1.38	0.0225	TRUE
Cxx1a	Cxx1a	chrX:53642488-53643763	OK	4.97	6.34	1.37	0.000117	TRUE
Fnta	Fnta	chr8:25998721-26015601	OK	6.45	7.82	1.37	0.000117	TRUE
Ift22	Ift22	chr5:136908149-136913244	OK	6.5	7.87	1.37	0.000117	TRUE
Lrrc73	Lrrc73	chr17:46254164-46257316	OK	3.1	4.47	1.37	0.000117	TRUE
Mrpl43	Mrpl43	chr19:45005013-45006442	OK	5.58	6.94	1.37	0.000117	TRUE
Ostc	Ostc	chr3:130695916-130709444	OK	5.71	7.08	1.37	0.000117	TRUE
Psma7	Psma7	chr2:180036366-180042464	OK	8.04	9.41	1.37	0.000117	TRUE
Rab13	Rab13	chr3:90213714-90226387	OK	2.37	3.74	1.37	0.000117	TRUE
Rheb	Rheb	chr5:24802822-24842361	OK	7.11	8.48	1.37	0.000117	TRUE
Slc35g2	Slc35g2	chr9:100552187-100571085	OK	4.42	5.78	1.37	0.000117	TRUE
Snrpb	Snrpb	chr2:130171635-130179364	OK	7.18	8.55	1.37	0.000117	TRUE
Snrpd3	Snrpd3	chr10:75518041-75535440	OK	7	8.37	1.37	0.000117	TRUE
Timm9	Timm9	chr12:71111427-71136675	OK	5.48	6.84	1.37	0.000117	TRUE
Tmem202	Tmem202	chr9:59518684-59525501	OK	1.59	2.96	1.37	0.000117	TRUE
Tomm22	Tomm22	chr15:79670867-79672862	OK	6.76	8.13	1.37	0.000117	TRUE
Krt17	Krt17	chr11:100256216-100260989	OK	-1.84	-0.46	1.37	0.0287	TRUE
Arf5	Arf5	chr6:28423639-28426499	OK	8.14	9.5	1.36	0.000117	TRUE
Bad	Bad	chr19:6938069-6951905	OK	5.85	7.21	1.36	0.000117	TRUE
Blcap	Blcap	chr2:157556361-157566361	OK	6.93	8.29	1.36	0.000117	TRUE
Bloc1s2	Bloc1s2	chr19:44139246-44146446	OK	6.01	7.37	1.36	0.000117	TRUE
Cfap20	Cfap20	chr8:95420249-95434869	OK	6.14	7.5	1.36	0.000117	TRUE
Commd9	Commd9	chr2:101886261-101901639	OK	5.93	7.29	1.36	0.000117	TRUE
Cox19	Cox19	chr5:139337821-139345166	OK	5.43	6.79	1.36	0.000117	TRUE
Fam216a	Fam216a	chr5:122364583-122371963	OK	7.41	8.77	1.36	0.000117	TRUE
Fbll1	Fbll1	chr11:35797379-35798884	OK	3.91	5.27	1.36	0.000117	TRUE
Glrx5	Glrx5	chr12:105032688-105040910	OK	7.07	8.43	1.36	0.000117	TRUE
Gtf2a2	Gtf2a2	chr9:70012547-70022866	OK	5.73	7.09	1.36	0.000117	TRUE
Mydgf	Mydgf	chr17:56176540-56183920	OK	5.69	7.05	1.36	0.000117	TRUE
Ndn	Ndn	chr7:62348276-62349927	OK	8.67	10.03	1.36	0.000117	TRUE
Nnat	Nnat	chr2:157556361-157566361	OK	8.85	10.21	1.36	0.000117	TRUE
Rpl10	Rpl10	chrX:74270815-74273135	OK	7.02	8.38	1.36	0.000117	TRUE
Tmem258	Tmem258	chr19:10204201-10207824	OK	7.21	8.57	1.36	0.000117	TRUE
Trappc4	Trappc4	chr9:44403758-44407548	OK	6.84	8.21	1.36	0.000117	TRUE
Ufc1	Ufc1	chr1:171288563-171294982	OK	6.3	7.67	1.36	0.000117	TRUE
Zic3	Zic3	chrX:58030627-58036630	OK	1.63	3	1.36	0.000117	TRUE
Gm5801	Gm5801	chr4:155943812-155959604	OK	0.81	2.18	1.36	0.000227	TRUE
Tacstd2	Tacstd2	chr6:67534058-67535822	OK	-1.4	-0.04	1.36	0.00841	TRUE
Bid	Bid	chr6:120893118-120916820	OK	3.68	5.03	1.35	0.000117	TRUE
Eid2	Eid2	chr7:28267880-28269168	OK	6.23	7.58	1.35	0.000117	TRUE
Gfra4	Gfra4	chr2:131039631-131043088	OK	6.45	7.8	1.35	0.000117	TRUE
Kremen2	Kremen2	chr17:23741198-23745829	OK	0.99	2.34	1.35	0.000117	TRUE
Minos1	Minos1	chr4:139101813-139131113	OK	5.69	7.04	1.35	0.000117	TRUE
Mocs2	Mocs2	chr13:114818236-114829420	OK	5.43	6.77	1.35	0.000117	TRUE
Mrps6	Mrps6	chr16:92058321-92112227	OK	6.45	7.8	1.35	0.000117	TRUE
Nkiras1	Nkiras1	chr14:18271141-18331844	OK	4.47	5.83	1.35	0.000117	TRUE
Nol12	Nol12	chr15:78934932-78941910	OK	4.1	5.45	1.35	0.000117	TRUE
Pmaip1	Pmaip1	chr18:66458603-66465558	OK	0.24	1.58	1.35	0.000117	TRUE
Rpl5	Rpl5	chr5:107900527-107987077	OK	6.08	7.43	1.35	0.000117	TRUE
Rps3a1	Rps3a1	chr3:86137939-86142668	OK	7.1	8.44	1.35	0.000117	TRUE
Sar1b	Sar1b	chr11:51763662-51791953	OK	5.96	7.3	1.35	0.000117	TRUE
Sult2b1	Sult2b1	chr7:45729982-45759555	OK	3.28	4.63	1.35	0.000117	TRUE
Sumo2	Sumo2	chr11:115523108-115536230	OK	8.48	9.83	1.35	0.000117	TRUE
Thoc7	Thoc7	chr14:13949011-13961313	OK	5.88	7.22	1.35	0.000117	TRUE
Tspan6	Tspan6	chrX:133891069-133898429	OK	3.78	5.13	1.35	0.000117	TRUE
Vps28	Vps28	chr15:76622085-76626084	OK	8.25	9.6	1.35	0.000117	TRUE
Tceal7	Tceal7	chrX:136224040-136226100	OK	0.28	1.63	1.35	0.00205	TRUE
1110004F10Rik	1110004F10Rik	chr7:116093379-116105210	OK	7.5	8.84	1.34	0.000117	TRUE
2610306M01Rik	2610306M01Rik	chr6:86848406-86849440	OK	3.75	5.09	1.34	0.000117	TRUE
Apoa1bp	Apoa1bp	chr3:88056522-88058495	OK	7.02	8.36	1.34	0.000117	TRUE
Apoo	Apoo	chrX:94367109-94417092	OK	6.96	8.31	1.34	0.000117	TRUE
B230217O12Rik	B230217O12Rik	chr19:57323196-57360899	OK	2.6	3.94	1.34	0.000117	TRUE
Ccdc107	Ccdc107	chr4:43493364-43495921	OK	5.21	6.54	1.34	0.000117	TRUE
Ccdc59	Ccdc59	chr10:105841478-105847510	OK	4.53	5.87	1.34	0.000117	TRUE
Cnih2	Cnih2	chr19:5088537-5098521	OK	8.6	9.94	1.34	0.000117	TRUE
Dalrd3	Dalrd3	chr9:108569891-108578670	OK	5.72	7.06	1.34	0.000117	TRUE
Dlx1as	Dlx1as	chr2:71389259-71903858	OK	3.22	4.56	1.34	0.000117	TRUE
Dohh	Dohh	chr10:81384427-81388352	OK	6.84	8.18	1.34	0.000117	TRUE
Irak1bp1	Irak1bp1	chr9:82829805-82847688	OK	3.52	4.86	1.34	0.000117	TRUE
Llph	Llph	chr10:120227059-120232070	OK	5.53	6.87	1.34	0.000117	TRUE
Mettl1	Mettl1	chr10:127041931-127045461	OK	3.65	4.99	1.34	0.000117	TRUE
Mrpl42	Mrpl42	chr10:95480805-95501927	OK	7.92	9.27	1.34	0.000117	TRUE
Nudt8	Nudt8	chr19:4000579-4002102	OK	3.94	5.28	1.34	0.000117	TRUE
Pebp1	Pebp1	chr5:117282650-117287564	OK	9.44	10.79	1.34	0.000117	TRUE
Rnmtl1	Rnmtl1	chr11:76243735-76250622	OK	4.57	5.91	1.34	0.000117	TRUE
Rpl7a	Rpl7a	chr2:26910806-26913311	OK	6.12	7.46	1.34	0.000117	TRUE
Rtn1	Rtn1	chr12:72211748-72409054	OK	9.69	11.02	1.34	0.000117	TRUE
Sdhaf3	Sdhaf3	chr6:6956017-7039220	OK	4.77	6.11	1.34	0.000117	TRUE
Smn1	Smn1	chr13:100123204-100137698	OK	3.92	5.26	1.34	0.000117	TRUE
Stmn2	Stmn2	chr3:8509526-8561604	OK	7.46	8.8	1.34	0.000117	TRUE
Tbcb	Tbcb	chr7:30224130-30232029	OK	7.09	8.43	1.34	0.000117	TRUE
Trappc6a	Trappc6a	chr7:19508728-19516145	OK	4.68	6.02	1.34	0.000117	TRUE
Trmt61b	Trmt61b	chr17:71552060-71598761	OK	3.92	5.25	1.34	0.000117	TRUE
Vat1	Vat1	chr11:101458747-101466199	OK	0.48	1.82	1.34	0.000117	TRUE
Ypel4	Ypel4	chr2:84734203-84737877	OK	4.84	6.18	1.34	0.000117	TRUE
Grk5	Grk5	chr19:60889748-61140840	OK	0.79	2.14	1.34	0.000637	TRUE
Actn3	Actn3	chr19:4861215-4877909	OK	-1.8	-0.46	1.34	0.00456	TRUE
2410004B18Rik	2410004B18Rik	chr3:145938031-145944275	OK	5.24	6.57	1.33	0.000117	TRUE
Amn1	Amn1	chr6:149157576-149188712	OK	3.99	5.32	1.33	0.000117	TRUE
Basp1	Basp1	chr15:25363276-25413764	OK	7.65	8.99	1.33	0.000117	TRUE
Cox6a1	Cox6a1	chr5:115345653-115348955	OK	10.13	11.46	1.33	0.000117	TRUE
Dpm1	Dpm1	chr2:168180964-168230379	OK	4.42	5.75	1.33	0.000117	TRUE
Dtd2	Dtd2	chr12:51997506-52006501	OK	3.66	4.99	1.33	0.000117	TRUE
Fam96b	Fam96b	chr8:104639838-104641728	OK	6.04	7.37	1.33	0.000117	TRUE
Fis1	Fis1	chr5:136953274-136966234	OK	8.33	9.65	1.33	0.000117	TRUE
Gm14295	Gm14295	chr2:176798599-176808704	OK	7.31	8.64	1.33	0.000117	TRUE
Gm1821	Gm1821	chr14:46084026-46084957	OK	10.84	12.17	1.33	0.000117	TRUE
Med11	Med11	chr11:70451930-70453726	OK	3.65	4.98	1.33	0.000117	TRUE
Mpc1	Mpc1	chr17:8283812-8327442	OK	8.55	9.88	1.33	0.000117	TRUE
Mtss1	Mtss1	chr15:58941233-59082026	OK	0.9	2.22	1.33	0.000117	TRUE
Nlgn2	Nlgn2	chr11:69823122-69834849	OK	0.75	2.08	1.33	0.000117	TRUE
Nol3	Nol3	chr8:105276446-105289528	OK	2.8	4.13	1.33	0.000117	TRUE
Phf5a	Phf5a	chr15:81864515-81871892	OK	4.65	5.98	1.33	0.000117	TRUE
Pnck	Pnck	chrX:73655991-73660070	OK	7.48	8.8	1.33	0.000117	TRUE
Ptpn3	Ptpn3	chr4:57190840-57301837	OK	-0.77	0.56	1.33	0.000117	TRUE
Rabac1	Rabac1	chr7:24969749-24972728	OK	7.99	9.32	1.33	0.000117	TRUE
Sf3b6	Sf3b6	chr12:4817607-4827659	OK	5.67	6.99	1.33	0.000117	TRUE
Tm2d1	Tm2d1	chr4:98355369-98383265	OK	5.63	6.97	1.33	0.000117	TRUE
Tmem158	Tmem158	chr9:123259056-123260789	OK	7.06	8.39	1.33	0.000117	TRUE
Immp2l	Immp2l	chr12:41024089-41955588	OK	2.69	4.01	1.33	0.00232	TRUE
Gjd3	Gjd3	chr11:98982179-98983016	OK	0.15	1.47	1.33	0.00582	TRUE
1700112J16Rik	1700112J16Rik	chr7:67204081-67222536	OK	0.9	2.23	1.33	0.0265	TRUE
4930413G21Rik	4930413G21Rik	chr7:122969057-122970459	OK	0.8	2.12	1.32	0.000117	TRUE
A230072C01Rik	A230072C01Rik	chrX:20951664-20987349	OK	2.63	3.95	1.32	0.000117	TRUE
Bloc1s4	Bloc1s4	chr5:36747373-36748679	OK	4.4	5.72	1.32	0.000117	TRUE
Ccl27a	Ccl27a	chr4:41760442-41774176	OK	6.92	8.24	1.32	0.000117	TRUE
Cuta	Cuta	chr17:26937971-26939538	OK	6.44	7.75	1.32	0.000117	TRUE
D830030K20Rik	D830030K20Rik	chr14:3846244-3856080	OK	0.82	2.15	1.32	0.000117	TRUE
Dhps	Dhps	chr8:85071756-85080746	OK	5.66	6.98	1.32	0.000117	TRUE
Dlk2	Dlk2	chr17:46297482-46328023	OK	3.39	4.71	1.32	0.000117	TRUE
Drap1	Drap1	chr19:5406814-5424979	OK	6.58	7.9	1.32	0.000117	TRUE
Eif5a	Eif5a	chr11:69916711-69921958	OK	9.29	10.6	1.32	0.000117	TRUE
Enkd1	Enkd1	chr8:105703651-105708168	OK	2.71	4.04	1.32	0.000117	TRUE
Itm2c	Itm2c	chr1:85894509-85908698	OK	9.39	10.72	1.32	0.000117	TRUE
Lyrm4	Lyrm4	chr13:35978796-36117357	OK	4.63	5.96	1.32	0.000117	TRUE
Mrpl11	Mrpl11	chr19:4962305-4966995	OK	4.12	5.44	1.32	0.000117	TRUE
Plgrkt	Plgrkt	chr19:29348676-29361871	OK	3.79	5.11	1.32	0.000117	TRUE
Prrt1	Prrt1	chr17:34629685-34632260	OK	3.85	5.17	1.32	0.000117	TRUE
Sra1	Sra1	chr18:36667186-36670311	OK	6.49	7.8	1.32	0.000117	TRUE
Tceal1	Tceal1	chrX:136708064-136709866	OK	5.45	6.77	1.32	0.000117	TRUE
Fbxl15	Fbxl15	chr19:46328183-46338660	OK	4.61	5.93	1.32	0.000227	TRUE
Apip	Apip	chr2:103073674-103092649	OK	4.42	5.73	1.31	0.000117	TRUE
Atp6v1g2	Atp6v1g2	chr17:35236595-35238768	OK	9.55	10.86	1.31	0.000117	TRUE
Bri3	Bri3	chr5:144244436-144361005	OK	2.44	3.75	1.31	0.000117	TRUE
Ccdc28a	Ccdc28a	chr10:18213684-18234981	OK	4.95	6.26	1.31	0.000117	TRUE
Cenpv	Cenpv	chr11:62524943-62539261	OK	5.22	6.53	1.31	0.000117	TRUE
Hist3h2ba	Hist3h2ba	chr11:58948910-58949372	OK	4.03	5.33	1.31	0.000117	TRUE
Med21	Med21	chr6:146642578-146650600	OK	6.16	7.47	1.31	0.000117	TRUE
Nxn	Nxn	chr11:76257225-76399141	OK	1.5	2.82	1.31	0.000117	TRUE
Pkib	Pkib	chr10:57631980-57741112	OK	1.71	3.02	1.31	0.000117	TRUE
Ppcs	Ppcs	chr4:119418532-119422420	OK	3.72	5.04	1.31	0.000117	TRUE
Ptgfrn	Ptgfrn	chr3:101040235-101110166	OK	-1.38	-0.07	1.31	0.000117	TRUE
Slmo2	Slmo2	chr2:174465090-174472941	OK	6.07	7.38	1.31	0.000117	TRUE
Sncb	Sncb	chr13:54758859-54766440	OK	7.33	8.63	1.31	0.000117	TRUE
Ssr2	Ssr2	chr3:88579670-88588413	OK	6.16	7.47	1.31	0.000117	TRUE
Tomm40	Tomm40	chr7:19701312-19715429	OK	6.97	8.28	1.31	0.000117	TRUE
Trappc2	Trappc2	chrX:166440824-166452543	OK	6.75	8.06	1.31	0.000117	TRUE
Zic5	Zic5	chr14:122459159-122465658	OK	1.73	3.05	1.31	0.000117	TRUE
1110004E09Rik	1110004E09Rik	chr16:90925810-90934849	OK	5.46	6.75	1.3	0.000117	TRUE
1700037H04Rik	1700037H04Rik	chr2:131127411-131604824	OK	7.63	8.92	1.3	0.000117	TRUE
Arl3	Arl3	chr19:46531108-46573085	OK	7.13	8.42	1.3	0.000117	TRUE
Cmc1	Cmc1	chr9:118040521-118150196	OK	3.83	5.13	1.3	0.000117	TRUE
Dnajc8	Dnajc8	chr4:132535558-132553742	OK	6.67	7.97	1.3	0.000117	TRUE
N6amt1	N6amt1	chr16:87354184-87368649	OK	4.47	5.77	1.3	0.000117	TRUE
Polr1d	Polr1d	chr5:147077345-147111361	OK	5.92	7.23	1.3	0.000117	TRUE
Psma3	Psma3	chr12:70974622-71015823	OK	7.42	8.72	1.3	0.000117	TRUE
Ssbp4	Ssbp4	chr8:70597489-70608314	OK	6.82	8.12	1.3	0.000117	TRUE
Tomm34	Tomm34	chr2:164053539-164071169	OK	6.47	7.77	1.3	0.000117	TRUE
Trpm4	Trpm4	chr7:45303154-45333780	OK	0.91	2.21	1.3	0.000117	TRUE
Gpx4	Gpx4	chr10:79697304-80369637	OK	8.99	10.29	1.3	0.000932	TRUE
Tspear	Tspear	chr10:77686568-77886769	OK	-1.44	-0.13	1.3	0.0032	TRUE
Toporsos	Toporsos	chr4:40259605-40270221	OK	4.2	5.5	1.3	0.0207	TRUE
2810428I15Rik	2810428I15Rik	chr8:70504295-70506739	OK	6.71	8	1.29	0.000117	TRUE
Cmss1	Cmss1	chr16:57301999-57606867	OK	3.9	5.19	1.29	0.000117	TRUE
Cystm1	Cystm1	chr18:36348623-36393370	OK	7.06	8.35	1.29	0.000117	TRUE
Erp29	Erp29	chr5:121444752-121452474	OK	5.82	7.11	1.29	0.000117	TRUE
Krtcap2	Krtcap2	chr3:89246437-89249722	OK	6.34	7.62	1.29	0.000117	TRUE
Lsm1	Lsm1	chr8:25785590-25803975	OK	4.06	5.36	1.29	0.000117	TRUE
Mrpl57	Mrpl57	chr14:57826238-57828745	OK	4.37	5.66	1.29	0.000117	TRUE
Ndufaf3	Ndufaf3	chr9:108565864-108567342	OK	6.29	7.58	1.29	0.000117	TRUE
Nudt6	Nudt6	chr3:37404981-37419596	OK	2.45	3.74	1.29	0.000117	TRUE
Saysd1	Saysd1	chr14:20075635-20083172	OK	2.68	3.97	1.29	0.000117	TRUE
Sdr39u1	Sdr39u1	chr14:55897284-55900232	OK	6.89	8.18	1.29	0.000117	TRUE
Tcea2	Tcea2	chr2:181680309-181688051	OK	4.66	5.95	1.29	0.000117	TRUE
Tmem141	Tmem141	chr2:25620065-25622005	OK	4.73	6.02	1.29	0.000117	TRUE
Tmem234	Tmem234	chr4:129600706-129607879	OK	6.91	8.2	1.29	0.000117	TRUE
Xlr3b	Xlr3b	chrX:73192178-73202930	OK	0.3	1.59	1.29	0.000117	TRUE
Yipf1	Yipf1	chr4:107314362-107359823	OK	5.19	6.48	1.29	0.000117	TRUE
Sox3	Sox3	chrX:60891365-60893430	OK	-0.48	0.82	1.29	0.000834	TRUE
C330013E15Rik	C330013E15Rik	chr15:100614139-100615110	OK	0.81	2.1	1.29	0.00131	TRUE
Ccl17	Ccl17	chr8:94810452-94812036	OK	1.06	2.35	1.29	0.0104	TRUE
2310009B15Rik	2310009B15Rik	chr1:138851978-138856854	OK	3.91	5.19	1.28	0.000117	TRUE
Alkbh2	Alkbh2	chr5:114123933-114128176	OK	2.34	3.62	1.28	0.000117	TRUE
Arl16	Arl16	chr11:120458128-120467600	OK	4.69	5.97	1.28	0.000117	TRUE
B630019K06Rik	B630019K06Rik	chrX:8892352-8894964	OK	5.11	6.39	1.28	0.000117	TRUE
B9d2	B9d2	chr7:25681157-25686558	OK	5.66	6.94	1.28	0.000117	TRUE
BC048546	BC048546	chr6:128539821-128581606	OK	0.03	1.31	1.28	0.000117	TRUE
Cby1	Cby1	chr15:79659226-79667660	OK	6.18	7.46	1.28	0.000117	TRUE
Dll3	Dll3	chr7:28293554-28301785	OK	0.44	1.72	1.28	0.000117	TRUE
Fxyd6	Fxyd6	chr9:45370184-45396159	OK	6.94	8.23	1.28	0.000117	TRUE
Gm19345	Gm19345	chr7:19852002-19861299	OK	1.47	2.75	1.28	0.000117	TRUE
Inafm1	Inafm1	chr7:16272012-16273692	OK	5.02	6.3	1.28	0.000117	TRUE
Mgst3	Mgst3	chr1:167372383-167393797	OK	7.83	9.11	1.28	0.000117	TRUE
Mrpl38	Mrpl38	chr11:116131816-116138868	OK	5.69	6.98	1.28	0.000117	TRUE
Mrpl51	Mrpl51	chr6:125192199-125194392	OK	5.69	6.97	1.28	0.000117	TRUE
Nkain3	Nkain3	chr4:20118873-20778668	OK	0.59	1.87	1.28	0.000117	TRUE
Nutf2-ps1	Nutf2-ps1	chr8:105860633-105880401	OK	6.6	7.88	1.28	0.000117	TRUE
Rpusd1	Rpusd1	chr17:25727750-25731456	OK	6.31	7.59	1.28	0.000117	TRUE
Sdf2	Sdf2	chr11:78245745-78255496	OK	5.54	6.81	1.28	0.000117	TRUE
Serf1	Serf1	chr13:100108018-100114233	OK	3.84	5.11	1.28	0.000117	TRUE
Siva1	Siva1	chr12:112644827-112649152	OK	5.42	6.7	1.28	0.000117	TRUE
Sumo3	Sumo3	chr10:77606096-77618331	OK	7.47	8.74	1.28	0.000117	TRUE
Tekt2	Tekt2	chr4:126322120-126325199	OK	0.92	2.2	1.28	0.000117	TRUE
Thap3	Thap3	chr4:151982637-151988986	OK	4.59	5.86	1.28	0.000117	TRUE
Xrcc6bp1	Xrcc6bp1	chr10:126868427-126901371	OK	3.71	5	1.28	0.000117	TRUE
Zfp383	Zfp383	chr7:29908516-29916813	OK	-0.85	0.43	1.28	0.000637	TRUE
Spats1	Spats1	chr17:45448936-45474938	OK	0.45	1.73	1.28	0.000834	TRUE
Snhg8	Snhg8	chr3:123507551-123508336	OK	1.06	2.34	1.28	0.0014	TRUE
Wfdc17	Wfdc17	chr11:83704055-83706269	OK	1.22	2.5	1.28	0.0117	TRUE
Aifm3	Aifm3	chr16:17489676-17507485	OK	3.79	5.06	1.27	0.000117	TRUE
B4galt7	B4galt7	chr13:55600110-55609954	OK	4.42	5.69	1.27	0.000117	TRUE
Ccdc85b	Ccdc85b	chr19:5447697-5457563	OK	4.85	6.12	1.27	0.000117	TRUE
Chga	Chga	chr12:102554968-102565027	OK	6.44	7.71	1.27	0.000117	TRUE
Dusp28	Dusp28	chr1:92906988-92908620	OK	5.26	6.53	1.27	0.000117	TRUE
Eif1a	Eif1a	chr18:46597703-46610225	OK	5.01	6.28	1.27	0.000117	TRUE
Endog	Endog	chr2:30171523-30178459	OK	4.47	5.74	1.27	0.000117	TRUE
Kctd13	Kctd13	chr7:126928878-126945609	OK	7.64	8.91	1.27	0.000117	TRUE
Lysmd2	Lysmd2	chr9:75625731-75637773	OK	6.56	7.83	1.27	0.000117	TRUE
Mrpl46	Mrpl46	chr7:78775340-78783089	OK	5.95	7.21	1.27	0.000117	TRUE
Pdxp	Pdxp	chr15:78913918-78919517	OK	8.29	9.57	1.27	0.000117	TRUE
Pdzd3	Pdzd3	chr9:44247311-44251464	OK	0.23	1.51	1.27	0.000117	TRUE
Psmb1	Psmb1	chr17:15475720-15498276	OK	8.05	9.33	1.27	0.000117	TRUE
Psmb4	Psmb4	chr3:94884323-94886958	OK	7.34	8.6	1.27	0.000117	TRUE
Rac3	Rac3	chr11:120721467-120723969	OK	5.2	6.47	1.27	0.000117	TRUE
Rrad	Rrad	chr8:104628065-104631321	OK	1.62	2.89	1.27	0.000117	TRUE
Scg5	Scg5	chr2:113776312-113829091	OK	7.69	8.96	1.27	0.000117	TRUE
Tmem126a	Tmem126a	chr7:90450711-90457208	OK	5.84	7.11	1.27	0.000117	TRUE
Tsfm	Tsfm	chr10:127022331-127030814	OK	5.15	6.42	1.27	0.000117	TRUE
Txn2	Txn2	chr15:77915050-77928994	OK	8	9.27	1.27	0.000117	TRUE
Txndc17	Txndc17	chr11:72207553-72210487	OK	5.3	6.58	1.27	0.000117	TRUE
Ydjc	Ydjc	chr16:17139063-17148857	OK	4.07	5.34	1.27	0.000117	TRUE
Yeats4	Yeats4	chr10:117215140-117224507	OK	4.37	5.64	1.27	0.000117	TRUE
Znhit2	Znhit2	chr19:6061206-6062468	OK	5.47	6.74	1.27	0.000117	TRUE
Particl	Particl	chr6:72432798-72440615	OK	4.03	5.3	1.27	0.000436	TRUE
Mrpl48	Mrpl48	chr7:100549116-100641268	OK	6.48	7.75	1.27	0.00196	TRUE
Tatdn1	Tatdn1	chr15:58889228-58933730	OK	2.18	3.46	1.27	0.0024	TRUE
4933412O06Rik	4933412O06Rik	chr13:15781663-15802630	OK	0.12	1.39	1.27	0.00258	TRUE
2610524H06Rik	2610524H06Rik	chr5:114821936-114823468	OK	4.62	5.88	1.26	0.000117	TRUE
Adra2b	Adra2b	chr2:127363285-127367221	OK	-1.09	0.17	1.26	0.000117	TRUE
Ap1s1	Ap1s1	chr5:137034993-137046060	OK	8.95	10.2	1.26	0.000117	TRUE
Arfrp1	Arfrp1	chr2:181357689-181380793	OK	4.87	6.13	1.26	0.000117	TRUE
Ccdc53	Ccdc53	chr10:88201096-88246158	OK	4.49	5.75	1.26	0.000117	TRUE
Cnrip1	Cnrip1	chr11:17051933-17079372	OK	6.48	7.73	1.26	0.000117	TRUE
Dnlz	Dnlz	chr2:26315532-26352110	OK	4.51	5.76	1.26	0.000117	TRUE
Gpr25	Gpr25	chr1:136258913-136260873	OK	1.81	3.07	1.26	0.000117	TRUE
Lca5l	Lca5l	chr16:96158405-96192257	OK	-0.62	0.65	1.26	0.000117	TRUE
Med6	Med6	chr12:81573563-81594958	OK	4.64	5.9	1.26	0.000117	TRUE
Mrpl15	Mrpl15	chr1:4773199-4785726	OK	3.83	5.09	1.26	0.000117	TRUE
Mt3	Mt3	chr8:94152606-94154148	OK	9	10.27	1.26	0.000117	TRUE
Mxra8	Mxra8	chr4:155839679-155844102	OK	3.25	4.51	1.26	0.000117	TRUE
Phf23	Phf23	chr11:69995765-70000011	OK	4.33	5.59	1.26	0.000117	TRUE
Ppdpf	Ppdpf	chr2:181187342-181188504	OK	6.68	7.94	1.26	0.000117	TRUE
Ppil3	Ppil3	chr1:58430992-58445486	OK	4.7	5.96	1.26	0.000117	TRUE
Psmd10	Psmd10	chrX:140948424-140956711	OK	5	6.27	1.26	0.000117	TRUE
Rab4b	Rab4b	chr7:27168432-27178883	OK	6.38	7.65	1.26	0.000117	TRUE
Rbm4	Rbm4	chr19:4784292-4811634	OK	3.22	4.48	1.26	0.000117	TRUE
Sac3d1	Sac3d1	chr19:6116003-6118586	OK	4.63	5.89	1.26	0.000117	TRUE
Slc18a2	Slc18a2	chr19:59260877-59296012	OK	1.08	2.33	1.26	0.000117	TRUE
Smim11	Smim11	chr16:92301302-92313041	OK	5.21	6.47	1.26	0.000117	TRUE
Snx3	Snx3	chr10:42502053-42535369	OK	7.97	9.22	1.26	0.000117	TRUE
Ten1	Ten1	chr11:116171882-116215318	OK	5.92	7.18	1.26	0.000117	TRUE
Wdr83	Wdr83	chr8:85071756-85080746	OK	4.91	6.17	1.26	0.000117	TRUE
Ypel3	Ypel3	chr7:126776974-126780514	OK	8.66	9.92	1.26	0.000117	TRUE
Stamos	Stamos	chr2:14070332-14073934	OK	0.49	1.74	1.26	0.00688	TRUE
1110065P20Rik	1110065P20Rik	chr4:124802548-124850730	OK	6.14	7.39	1.25	0.000117	TRUE
2010320M18Rik	2010320M18Rik	chr8:70776861-70777606	OK	3.34	4.59	1.25	0.000117	TRUE
Alad	Alad	chr4:62505983-62520063	OK	3.74	4.99	1.25	0.000117	TRUE
Arl4a	Arl4a	chr12:40033290-40037987	OK	4.08	5.34	1.25	0.000117	TRUE
Atg9b	Atg9b	chr5:24364818-24392143	OK	0.72	1.97	1.25	0.000117	TRUE
B230118H07Rik	B230118H07Rik	chr2:101560780-101632528	OK	4.41	5.67	1.25	0.000117	TRUE
Gnas	Gnas	chr2:174281236-174346742	OK	10.32	11.57	1.25	0.000117	TRUE
Lyrm2	Lyrm2	chr4:32800258-32802254	OK	4.85	6.09	1.25	0.000117	TRUE
Mthfsl	Mthfsl	chr9:88688604-88719798	OK	2.94	4.2	1.25	0.000117	TRUE
Ola1	Ola1	chr2:73092800-73214447	OK	5.61	6.86	1.25	0.000117	TRUE
Pdlim5	Pdlim5	chr3:142239584-142395696	OK	1.79	3.04	1.25	0.000117	TRUE
Pdrg1	Pdrg1	chr2:153008889-153015383	OK	6.41	7.66	1.25	0.000117	TRUE
Rpp25	Rpp25	chr9:57504101-57505447	OK	4.86	6.1	1.25	0.000117	TRUE
Scnm1	Scnm1	chr3:95129718-95134012	OK	5.98	7.23	1.25	0.000117	TRUE
Sdhb	Sdhb	chr4:140961270-140979192	OK	8.68	9.93	1.25	0.000117	TRUE
Tmem223	Tmem223	chr19:8770995-8772475	OK	6.26	7.51	1.25	0.000117	TRUE
Vps37d	Vps37d	chr5:135072899-135078266	OK	4.3	5.55	1.25	0.000117	TRUE
Wnt10a	Wnt10a	chr1:74792018-74804175	OK	1.76	3.01	1.25	0.000117	TRUE
Yrdc	Yrdc	chr4:124850758-124862171	OK	5.39	6.64	1.25	0.000117	TRUE
Carlr	Carlr	chr2:18799247-18801818	OK	-0.04	1.21	1.25	0.000227	TRUE
4930577N17Rik	4930577N17Rik	chr3:51252719-51340644	OK	-0.29	0.95	1.25	0.0318	TRUE
1700007K13Rik	1700007K13Rik	chr2:28462000-28466324	OK	3.5	4.74	1.24	0.000117	TRUE
Arpc5	Arpc5	chr1:152766541-152775580	OK	6.98	8.22	1.24	0.000117	TRUE
Atp5f1	Atp5f1	chr3:105942677-105969760	OK	8.2	9.44	1.24	0.000117	TRUE
B2m	B2m	chr2:122120107-122186189	OK	5.91	7.16	1.24	0.000117	TRUE
Bax	Bax	chr7:45461694-45466898	OK	6.11	7.35	1.24	0.000117	TRUE
Cacybp	Cacybp	chr1:160202366-160212892	OK	6.65	7.89	1.24	0.000117	TRUE
Cmc2	Cmc2	chr8:116888684-116921436	OK	3.65	4.89	1.24	0.000117	TRUE
Dnajc17	Dnajc17	chr2:119172499-119217050	OK	3.75	4.99	1.24	0.000117	TRUE
Efcab1	Efcab1	chr16:14906645-14924522	OK	3.92	5.16	1.24	0.000117	TRUE
Fzd1	Fzd1	chr5:4753838-4758216	OK	1.19	2.43	1.24	0.000117	TRUE
Map1lc3a	Map1lc3a	chr2:155276363-155278073	OK	8.45	9.69	1.24	0.000117	TRUE
Mrps10	Mrps10	chr17:47368886-47378679	OK	6.02	7.26	1.24	0.000117	TRUE
Nr2c2ap	Nr2c2ap	chr8:70130805-70139197	OK	4.81	6.05	1.24	0.000117	TRUE
Ost4	Ost4	chr5:30888851-30907788	OK	7.36	8.6	1.24	0.000117	TRUE
P4htm	P4htm	chr9:108578825-108597600	OK	5.94	7.18	1.24	0.000117	TRUE
Pgam2	Pgam2	chr11:5801636-5803796	OK	4.12	5.36	1.24	0.000117	TRUE
Ppia	Ppia	chr11:6415869-6419810	OK	11.22	12.46	1.24	0.000117	TRUE
Psme2	Psme2	chr14:55587439-55591101	OK	6.03	7.26	1.24	0.000117	TRUE
Rab24	Rab24	chr13:55319222-55321980	OK	6.35	7.58	1.24	0.000117	TRUE
Rasl11a	Rasl11a	chr5:146845070-146847726	OK	1.81	3.05	1.24	0.000117	TRUE
Rp9	Rp9	chr9:22448311-22468356	OK	5.12	6.36	1.24	0.000117	TRUE
Rpl7	Rpl7	chr1:16101295-16104433	OK	6.88	8.11	1.24	0.000117	TRUE
Snrnp48	Snrnp48	chr13:38204938-38227663	OK	2.03	3.27	1.24	0.000117	TRUE
Syngr3	Syngr3	chr17:24685091-24689949	OK	7.91	9.16	1.24	0.000117	TRUE
Tpgs1	Tpgs1	chr10:79669409-79676126	OK	6.71	7.95	1.24	0.000117	TRUE
Zrsr2	Zrsr2	chrX:163935442-163958666	OK	3.97	5.2	1.24	0.000117	TRUE
Cap1	Cap1	chr4:122836226-122886057	OK	5.52	6.76	1.24	0.00112	TRUE
C130036L24Rik	C130036L24Rik	chr1:86359573-86367964	OK	0.24	1.48	1.24	0.00178	TRUE
Acbd6	Acbd6	chr1:155558119-155687233	OK	5.63	6.86	1.23	0.000117	TRUE
Atp6v0e2	Atp6v0e2	chr6:48537568-48541800	OK	8.53	9.76	1.23	0.000117	TRUE
Atp6v1e1	Atp6v1e1	chr6:120795243-120822685	OK	9.08	10.31	1.23	0.000117	TRUE
C530005A16Rik	C530005A16Rik	chr4:116557726-116600266	OK	1.99	3.22	1.23	0.000117	TRUE
Ddx41	Ddx41	chr13:55530409-55536658	OK	4.75	5.97	1.23	0.000117	TRUE
Emc10	Emc10	chr7:44489937-44496513	OK	7.06	8.3	1.23	0.000117	TRUE
H2-T10	H2-T10	chr17:36115870-36121444	OK	1.63	2.85	1.23	0.000117	TRUE
H3f3b	H3f3b	chr11:116021960-116024504	OK	8.29	9.52	1.23	0.000117	TRUE
Habp4	Habp4	chr13:64161865-64186537	OK	7.86	9.09	1.23	0.000117	TRUE
Lage3	Lage3	chrX:74352161-74353618	OK	4.62	5.86	1.23	0.000117	TRUE
Lamtor4	Lamtor4	chr5:138255481-138259395	OK	5.26	6.49	1.23	0.000117	TRUE
Med30	Med30	chr15:52712444-52730431	OK	5.39	6.62	1.23	0.000117	TRUE
Nenf	Nenf	chr1:191306796-191318118	OK	6.63	7.85	1.23	0.000117	TRUE
Pithd1	Pithd1	chr4:135975601-135987244	OK	7.38	8.61	1.23	0.000117	TRUE
Pusl1	Pusl1	chr4:155869566-155891762	OK	4.25	5.48	1.23	0.000117	TRUE
Rnf25	Rnf25	chr1:74593747-74601397	OK	5.14	6.37	1.23	0.000117	TRUE
Sat2	Sat2	chr11:69622108-69623869	OK	3.33	4.56	1.23	0.000117	TRUE
Slbp	Slbp	chr5:33640054-33652574	OK	5.06	6.3	1.23	0.000117	TRUE
Snx15	Snx15	chr19:6119403-6128215	OK	5.69	6.92	1.23	0.000117	TRUE
Stambpl1	Stambpl1	chr19:34192269-34240328	OK	3.74	4.97	1.23	0.000117	TRUE
Thoc3	Thoc3	chr13:54458836-54468840	OK	4.85	6.08	1.23	0.000117	TRUE
Tppp3	Tppp3	chr8:105467491-105471422	OK	7.16	8.39	1.23	0.000117	TRUE
Mboat4	Mboat4	chr8:34115029-34125185	OK	-1.87	-0.64	1.23	0.0304	TRUE
1700037C18Rik	1700037C18Rik	chr16:3905797-3908689	OK	2.99	4.21	1.22	0.000117	TRUE
2310039H08Rik	2310039H08Rik	chr17:46772634-46773407	OK	3.5	4.72	1.22	0.000117	TRUE
Abhd14a	Abhd14a	chr9:106440050-106447678	OK	5.22	6.44	1.22	0.000117	TRUE
Acd	Acd	chr8:105690905-105701095	OK	5.63	6.85	1.22	0.000117	TRUE
Adprm	Adprm	chr11:67037879-67052618	OK	3.99	5.2	1.22	0.000117	TRUE
Brms1	Brms1	chr19:5041403-5049917	OK	5.4	6.62	1.22	0.000117	TRUE
Cpne7	Cpne7	chr8:123117373-123135185	OK	4.31	5.53	1.22	0.000117	TRUE
Dnajc30	Dnajc30	chr5:135052956-135065365	OK	6.42	7.65	1.22	0.000117	TRUE
Fkbp2	Fkbp2	chr19:6977738-6980461	OK	7.79	9.01	1.22	0.000117	TRUE
Immp1l	Immp1l	chr2:105904637-105965558	OK	5.59	6.81	1.22	0.000117	TRUE
Imp3	Imp3	chr9:56937499-56938398	OK	5.23	6.46	1.22	0.000117	TRUE
Isoc2b	Isoc2b	chr7:4844959-4866179	OK	3.17	4.39	1.22	0.000117	TRUE
Krt77	Krt77	chr15:101859855-101869618	OK	2.55	3.77	1.22	0.000117	TRUE
2017-03-09	2017-03-09	chr10:127056049-127060184	OK	0.96	2.19	1.22	0.000117	TRUE
Mrpl30	Mrpl30	chr1:37890552-37898333	OK	6.91	8.13	1.22	0.000117	TRUE
Mrpl47	Mrpl47	chr3:32727496-32736755	OK	4.47	5.69	1.22	0.000117	TRUE
Mrpl50	Mrpl50	chr4:49512596-49521083	OK	5	6.22	1.22	0.000117	TRUE
Mzt2	Mzt2	chr16:15848440-15863322	OK	4.98	6.2	1.22	0.000117	TRUE
Prss36	Prss36	chr7:127932637-127946725	OK	1.59	2.81	1.22	0.000117	TRUE
Rrs1	Rrs1	chr1:9545407-9547455	OK	3.92	5.14	1.22	0.000117	TRUE
Skp1a	Skp1a	chr11:52231994-52246858	OK	8.5	9.72	1.22	0.000117	TRUE
Ttc32	Ttc32	chr12:9029996-9036394	OK	1.71	2.92	1.22	0.000117	TRUE
Wasl	Wasl	chr6:24613809-24664995	OK	4.74	5.97	1.22	0.000117	TRUE
Wbscr22	Wbscr22	chr5:135052956-135065365	OK	5.14	6.37	1.22	0.000117	TRUE
Zfp688	Zfp688	chr7:127418965-127422034	OK	4.44	5.66	1.22	0.000117	TRUE
Zbtb11os1	Zbtb11os1	chr16:55973267-56008912	OK	2.37	3.59	1.22	0.000932	TRUE
4930479D17Rik	4930479D17Rik	chr6:146657217-146665403	OK	1.07	2.29	1.22	0.00267	TRUE
2900008C10Rik	2900008C10Rik	chrX:12036737-12160355	OK	1.08	2.3	1.22	0.00337	TRUE
Rab20	Rab20	chr8:11453976-11480241	OK	1.3	2.51	1.22	0.00337	TRUE
Rnf207	Rnf207	chr4:152297213-152318625	OK	0.8	2.02	1.22	0.0175	TRUE
Gm16432	Gm16432	chr1:177991434-178048291	OK	-1.6	-0.38	1.22	0.0258	TRUE
H2-T9	H2-T9	chr17:36038408-36042702	OK	1.82	3.04	1.22	0.037	TRUE
Arhgdib	Arhgdib	chr6:136923660-136941899	OK	5.06	6.27	1.21	0.000117	TRUE
Atp1b1	Atp1b1	chr1:164307671-164458355	OK	8.51	9.72	1.21	0.000117	TRUE
Atp6ap1l	Atp6ap1l	chr13:90883448-90905355	OK	3.21	4.42	1.21	0.000117	TRUE
Chrac1	Chrac1	chr15:73090411-73094075	OK	5.59	6.8	1.21	0.000117	TRUE
Eif3m	Eif3m	chr2:104886323-105017027	OK	6.12	7.34	1.21	0.000117	TRUE
Emc7	Emc7	chr2:112455024-112467436	OK	6.39	7.59	1.21	0.000117	TRUE
Fdx1	Fdx1	chr9:51943024-51963602	OK	4.04	5.26	1.21	0.000117	TRUE
Gale	Gale	chr4:135965164-135968178	OK	3.68	4.89	1.21	0.000117	TRUE
Mrpl1	Mrpl1	chr5:96210114-96266727	OK	2.86	4.08	1.21	0.000117	TRUE
Nagk	Nagk	chr6:83795056-83802556	OK	6.15	7.36	1.21	0.000117	TRUE
Pdzd11	Pdzd11	chrX:100622905-100625907	OK	6.26	7.48	1.21	0.000117	TRUE
Snrnp35	Snrnp35	chr5:124483154-124491122	OK	3.63	4.84	1.21	0.000117	TRUE
Snrpa	Snrpa	chr7:27187005-27205386	OK	6.11	7.33	1.21	0.000117	TRUE
Spin2c	Spin2c	chrX:153832292-153834240	OK	3.49	4.7	1.21	0.000117	TRUE
Sub1	Sub1	chr15:11981338-11996007	OK	6.84	8.05	1.21	0.000117	TRUE
Triap1	Triap1	chr5:115341246-115343552	OK	4.78	6	1.21	0.000117	TRUE
Tubb2a	Tubb2a	chr13:34074279-34078008	OK	8.99	10.2	1.21	0.000117	TRUE
9530080O11Rik	9530080O11Rik	chr4:95959710-96024274	OK	0.83	2.05	1.21	0.0199	TRUE
Prr19	Prr19	chr7:25301358-25304133	OK	-1.44	-0.23	1.21	0.0385	TRUE
6430571L13Rik	6430571L13Rik	chr9:107340639-107349683	OK	2	3.2	1.2	0.000117	TRUE
Aen	Aen	chr7:78895926-78908833	OK	4.58	5.77	1.2	0.000117	TRUE
Agap2	Agap2	chr10:127078906-127093170	OK	-0.12	1.08	1.2	0.000117	TRUE
Bag1	Bag1	chr4:40936397-40948294	OK	7.69	8.89	1.2	0.000117	TRUE
Bean1	Bean1	chr8:104170512-104219097	OK	2.75	3.95	1.2	0.000117	TRUE
Calm1	Calm1	chr12:100199540-100209806	OK	9.42	10.62	1.2	0.000117	TRUE
Dexi	Dexi	chr16:10530206-10543054	OK	5.8	6.99	1.2	0.000117	TRUE
Dnajc12	Dnajc12	chr10:63382442-63408840	OK	4.32	5.53	1.2	0.000117	TRUE
Exoc3l	Exoc3l	chr8:105289923-105296098	OK	0.19	1.39	1.2	0.000117	TRUE
Fahd2a	Fahd2a	chr2:127436214-127444565	OK	4.79	5.99	1.2	0.000117	TRUE
Fkbpl	Fkbpl	chr17:34644882-34646327	OK	3.2	4.39	1.2	0.000117	TRUE
Jagn1	Jagn1	chr6:113442516-113448229	OK	5.43	6.63	1.2	0.000117	TRUE
Ndufb9	Ndufb9	chr15:58933809-58939489	OK	9.32	10.52	1.2	0.000117	TRUE
Nxt1	Nxt1	chr2:148672614-148676026	OK	4.18	5.38	1.2	0.000117	TRUE
Sarnp	Sarnp	chr10:128821770-128877638	OK	6.41	7.61	1.2	0.000117	TRUE
Slc37a1	Slc37a1	chr17:31295482-31350698	OK	1.46	2.66	1.2	0.000117	TRUE
Srek1ip1	Srek1ip1	chr13:104817238-104838659	OK	3.06	4.26	1.2	0.000117	TRUE
Srsf2	Srsf2	chr11:116849896-116853094	OK	6.25	7.44	1.2	0.000117	TRUE
Surf2	Surf2	chr2:26913377-26933511	OK	5.1	6.29	1.2	0.000117	TRUE
Tmem9	Tmem9	chr1:136008218-136035030	OK	5.99	7.19	1.2	0.000117	TRUE
Artn	Artn	chr4:117926159-117929763	OK	-0.55	0.66	1.2	0.00187	TRUE
Adrb3	Adrb3	chr8:27225775-27229588	OK	-1.11	0.08	1.2	0.00205	TRUE
E130218I03Rik	E130218I03Rik	chr4:134243305-134245873	OK	1.66	2.85	1.2	0.0068	TRUE
Gprin2	Gprin2	chr14:34194440-34201633	OK	-1.04	0.16	1.2	0.0123	TRUE
Ccdc106	Ccdc106	chr7:5056151-5060784	OK	5.58	6.77	1.19	0.000117	TRUE
Cfl1	Cfl1	chr19:5490454-5494031	OK	9.86	11.06	1.19	0.000117	TRUE
Dpcd	Dpcd	chr19:45560614-45660193	OK	6.1	7.29	1.19	0.000117	TRUE
Gmnn	Gmnn	chr13:24751844-24761937	OK	3.1	4.28	1.19	0.000117	TRUE
Lin37	Lin37	chr7:30555440-30559646	OK	5.43	6.62	1.19	0.000117	TRUE
Mrpl28	Mrpl28	chr17:26123502-26126613	OK	7.14	8.33	1.19	0.000117	TRUE
Prdx2	Prdx2	chr8:84969647-84974313	OK	8.74	9.93	1.19	0.000117	TRUE
Ptprh	Ptprh	chr7:4548613-4604041	OK	-0.9	0.29	1.19	0.000117	TRUE
Rdh14	Rdh14	chr12:10390779-10395562	OK	5.28	6.47	1.19	0.000117	TRUE
Smim8	Smim8	chr4:34768671-34778337	OK	4.61	5.8	1.19	0.000117	TRUE
Tcerg1l	Tcerg1l	chr7:138208971-138397730	OK	4.19	5.37	1.19	0.000117	TRUE
Vps72	Vps72	chr3:95111041-95123051	OK	5.5	6.69	1.19	0.000117	TRUE
Zmat5	Zmat5	chr11:4704677-4737666	OK	5.86	7.04	1.19	0.000117	TRUE
2500002B13Rik	2500002B13Rik	chr8:57487962-57510262	OK	-0.56	0.63	1.19	0.0399	TRUE
1110012L19Rik	1110012L19Rik	chrX:70385912-70389416	OK	4.25	5.43	1.18	0.000117	TRUE
1110059G10Rik	1110059G10Rik	chr9:122945088-122951000	OK	2.28	3.46	1.18	0.000117	TRUE
Acp1	Acp1	chr12:30884323-30911612	OK	5.28	6.46	1.18	0.000117	TRUE
Ano1	Ano1	chr7:144588548-144738592	OK	0.76	1.94	1.18	0.000117	TRUE
Cpne4	Cpne4	chr9:104569787-105034544	OK	2.76	3.94	1.18	0.000117	TRUE
Fam229b	Fam229b	chr10:39118807-39133895	OK	4.44	5.62	1.18	0.000117	TRUE
Park7	Park7	chr4:150897132-150909921	OK	8.24	9.42	1.18	0.000117	TRUE
Pde6d	Pde6d	chr1:86543014-86582501	OK	6.41	7.59	1.18	0.000117	TRUE
Psmd9	Psmd9	chr5:123228189-123250125	OK	4.53	5.71	1.18	0.000117	TRUE
Sdhd	Sdhd	chr9:50596339-50603849	OK	7.84	9.02	1.18	0.000117	TRUE
Sergef	Sergef	chr7:46443158-46639807	OK	4.42	5.6	1.18	0.000117	TRUE
Slc35f4	Slc35f4	chr14:49298519-49525837	OK	3.49	4.67	1.18	0.000117	TRUE
Tmem203	Tmem203	chr2:25255438-25256352	OK	3.15	4.33	1.18	0.000117	TRUE
Tmem35	Tmem35	chrX:134295224-134305969	OK	5.11	6.3	1.18	0.000117	TRUE
Tomm20	Tomm20	chr8:126930663-126945921	OK	5.44	6.62	1.18	0.000117	TRUE
Trmt61a	Trmt61a	chr12:111678104-111683902	OK	3.94	5.11	1.18	0.000117	TRUE
Tspan7	Tspan7	chrX:10485115-10596604	OK	9.53	10.71	1.18	0.000117	TRUE
Tsr3	Tsr3	chr17:25240169-25256364	OK	5.22	6.4	1.18	0.000117	TRUE
Ube2f	Ube2f	chr1:91250318-91286025	OK	5.17	6.35	1.18	0.000117	TRUE
Uchl1	Uchl1	chr5:66626494-66687234	OK	8.52	9.7	1.18	0.000117	TRUE
Umad1	Umad1	chr6:8259287-8428765	OK	5.55	6.73	1.18	0.000117	TRUE
Med19	Med19	chr2:84671310-84715164	OK	4.63	5.81	1.18	0.00582	TRUE
1700048O20Rik	1700048O20Rik	chr9:121937274-121947016	OK	3.34	4.51	1.17	0.000117	TRUE
Angptl6	Angptl6	chr9:20868641-20879710	OK	4.82	5.99	1.17	0.000117	TRUE
Ccdc32	Ccdc32	chr2:119017778-119029393	OK	5.52	6.69	1.17	0.000117	TRUE
Cfdp1	Cfdp1	chr8:111768472-111854310	OK	6.84	8.01	1.17	0.000117	TRUE
Cnpy3	Cnpy3	chr17:46735710-46752214	OK	5.56	6.73	1.17	0.000117	TRUE
Efna3	Efna3	chr3:89314950-89322879	OK	4.92	6.08	1.17	0.000117	TRUE
Frat1	Frat1	chr19:41829969-41832583	OK	1.13	2.3	1.17	0.000117	TRUE
Hagh	Hagh	chr17:24850489-24864450	OK	7.51	8.68	1.17	0.000117	TRUE
Itpa	Itpa	chr2:130667840-130681614	OK	6.14	7.31	1.17	0.000117	TRUE
Lyplal1	Lyplal1	chr1:186087731-186117310	OK	2.56	3.74	1.17	0.000117	TRUE
Mkln1os	Mkln1os	chr6:31366884-31398773	OK	1.84	3.01	1.17	0.000117	TRUE
Morf4l2	Morf4l2	chrX:136732947-136803361	OK	7.99	9.17	1.17	0.000117	TRUE
Ndufaf5	Ndufaf5	chr2:140170645-140205252	OK	3.84	5	1.17	0.000117	TRUE
Ociad1	Ociad1	chr5:73292793-73314077	OK	6.64	7.81	1.17	0.000117	TRUE
Palmd	Palmd	chr3:116918261-116984406	OK	2.29	3.47	1.17	0.000117	TRUE
Pcgf1	Pcgf1	chr6:83078389-83080855	OK	4.66	5.83	1.17	0.000117	TRUE
Pgls	Pgls	chr8:71592183-71596267	OK	5.35	6.52	1.17	0.000117	TRUE
Pigx	Pigx	chr16:32084415-32099727	OK	3.91	5.07	1.17	0.000117	TRUE
Polr2d	Polr2d	chr18:31789158-31796701	OK	5.24	6.41	1.17	0.000117	TRUE
Smim12	Smim12	chr4:127243783-127247809	OK	6.35	7.52	1.17	0.000117	TRUE
St8sia6	St8sia6	chr2:13654935-13793520	OK	0.21	1.39	1.17	0.000117	TRUE
U2af1	U2af1	chr17:31647081-31658754	OK	6.1	7.27	1.17	0.000117	TRUE
Mettl5	Mettl5	chr2:69861561-69885615	OK	4.29	5.46	1.17	0.000834	TRUE
Mettl24	Mettl24	chr10:40683281-40811083	OK	-0.11	1.07	1.17	0.00223	TRUE
5730409E04Rik	5730409E04Rik	chr4:126609853-126614371	OK	1.93	3.1	1.16	0.000117	TRUE
Bod1	Bod1	chr11:31665149-31671862	OK	7.04	8.2	1.16	0.000117	TRUE
Btf3	Btf3	chr13:98309896-98317006	OK	6.66	7.82	1.16	0.000117	TRUE
Ccnc	Ccnc	chr4:21727700-21767211	OK	4.5	5.66	1.16	0.000117	TRUE
Cend1	Cend1	chr7:141426450-141429420	OK	8.22	9.38	1.16	0.000117	TRUE
Commd3	Commd3	chr2:18672461-18676216	OK	6.97	8.13	1.16	0.000117	TRUE
Dbndd1	Dbndd1	chr8:123504717-123515455	OK	4.66	5.82	1.16	0.000117	TRUE
Ethe1	Ethe1	chr7:24583837-24608926	OK	4.44	5.6	1.16	0.000117	TRUE
Exosc5	Exosc5	chr7:25659152-25668032	OK	4.29	5.45	1.16	0.000117	TRUE
Fam43b	Fam43b	chr4:138394091-138396458	OK	4.66	5.82	1.16	0.000117	TRUE
Mrpl17	Mrpl17	chr7:105803781-105811087	OK	3.29	4.45	1.16	0.000117	TRUE
Pomc	Pomc	chr12:3954944-3960643	OK	1.57	2.73	1.16	0.000117	TRUE
Ppil1	Ppil1	chr17:29250834-29263971	OK	5.3	6.45	1.16	0.000117	TRUE
Prmt2	Prmt2	chr10:76207225-76237865	OK	7.24	8.39	1.16	0.000117	TRUE
Rltpr	Rltpr	chr8:105690905-105701095	OK	4.49	5.65	1.16	0.000117	TRUE
Smim14	Smim14	chr5:65448754-65492835	OK	6.71	7.86	1.16	0.000117	TRUE
Snrpc	Snrpc	chr17:27840086-27851967	OK	5.35	6.51	1.16	0.000117	TRUE
Snx16	Snx16	chr3:10417816-10440130	OK	3.87	5.03	1.16	0.000117	TRUE
Tprgl	Tprgl	chr4:154157484-154160684	OK	8.32	9.47	1.16	0.000117	TRUE
Znrd1as	Znrd1as	chr17:36958591-36965623	OK	2.3	3.45	1.16	0.000117	TRUE
Dlx6	Dlx6	chr6:6820545-6869533	OK	1.57	2.73	1.16	0.0153	TRUE
1110008P14Rik	1110008P14Rik	chr2:32379100-32381915	OK	7.19	8.35	1.15	0.000117	TRUE
1110038F14Rik	1110038F14Rik	chr15:76948543-76950731	OK	4.51	5.66	1.15	0.000117	TRUE
2410002F23Rik	2410002F23Rik	chr7:44246721-44252319	OK	6.3	7.45	1.15	0.000117	TRUE
Adamtsl2	Adamtsl2	chr2:27079380-27108613	OK	0.76	1.91	1.15	0.000117	TRUE
Atp5sl	Atp5sl	chr7:25619413-25625550	OK	5.37	6.52	1.15	0.000117	TRUE
Cmas	Cmas	chr6:142756685-142775714	OK	6.87	8.02	1.15	0.000117	TRUE
Coq7	Coq7	chr7:118509658-118533356	OK	6.46	7.61	1.15	0.000117	TRUE
Fam69b	Fam69b	chr2:26628456-26636497	OK	6.34	7.48	1.15	0.000117	TRUE
Flywch2	Flywch2	chr17:23776917-23786077	OK	4.85	6	1.15	0.000117	TRUE
Fos	Fos	chr12:85473900-85477270	OK	3.65	4.8	1.15	0.000117	TRUE
Gabarapl1	Gabarapl1	chr6:129532183-129542331	OK	9.35	10.5	1.15	0.000117	TRUE
Gm11974	Gm11974	chr11:6525590-6528760	OK	2.73	3.88	1.15	0.000117	TRUE
Ifit1bl1	Ifit1bl1	chr19:34592887-34601968	OK	0.68	1.84	1.15	0.000117	TRUE
Inca1	Inca1	chr11:70688360-70700155	OK	1.62	2.77	1.15	0.000117	TRUE
Mcfd2	Mcfd2	chr17:87254442-87265947	OK	6.19	7.33	1.15	0.000117	TRUE
Mrpl19	Mrpl19	chr6:81923668-81965949	OK	3.05	4.2	1.15	0.000117	TRUE
Mrpl40	Mrpl40	chr16:18872017-18876637	OK	5.98	7.13	1.15	0.000117	TRUE
Ube2w	Ube2w	chr1:16540787-16619338	OK	5.1	6.26	1.15	0.000117	TRUE
Zcchc18	Zcchc18	chrX:136981115-137038302	OK	8.02	9.18	1.15	0.000117	TRUE
Ssc4d	Ssc4d	chr5:135960222-135974476	OK	-0.97	0.18	1.15	0.0024	TRUE
3010001F23Rik	3010001F23Rik	chrX:152368571-152416702	OK	0.75	1.9	1.15	0.00381	TRUE
9030025P20Rik	9030025P20Rik	chr17:14964188-15022449	OK	-0.44	0.7	1.15	0.0054	TRUE
Ceacam16	Ceacam16	chr7:19852002-19861299	OK	-0.68	0.47	1.15	0.0273	TRUE
2700060E02Rik	2700060E02Rik	chr14:19751256-19823823	OK	5.5	6.65	1.14	0.000117	TRUE
9430038I01Rik	9430038I01Rik	chr7:137375568-137410756	OK	1.49	2.63	1.14	0.000117	TRUE
Anapc15	Anapc15	chr7:101881324-101899545	OK	4.14	5.28	1.14	0.000117	TRUE
Ankrd29	Ankrd29	chr18:12252356-12305720	OK	3.73	4.87	1.14	0.000117	TRUE
Atp5c1	Atp5c1	chr2:10056030-10080510	OK	8.63	9.77	1.14	0.000117	TRUE
C130026L21Rik	C130026L21Rik	chr5:111581560-111587153	OK	1.04	2.18	1.14	0.000117	TRUE
Ccdc101	Ccdc101	chr7:126649308-126672779	OK	4.63	5.77	1.14	0.000117	TRUE
Crip2	Crip2	chr12:113140235-113145506	OK	8.23	9.36	1.14	0.000117	TRUE
Dnal4	Dnal4	chr15:79761448-79774467	OK	6.46	7.59	1.14	0.000117	TRUE
Dusp15	Dusp15	chr2:152940994-152951582	OK	3.93	5.07	1.14	0.000117	TRUE
Exosc1	Exosc1	chr19:41922979-41933314	OK	4.07	5.22	1.14	0.000117	TRUE
Fbxo44	Fbxo44	chr4:148152798-148160094	OK	6.98	8.12	1.14	0.000117	TRUE
Gng10	Gng10	chr4:59035155-59041899	OK	6.16	7.3	1.14	0.000117	TRUE
Hexim1	Hexim1	chr11:103116324-103119724	OK	1.94	3.07	1.14	0.000117	TRUE
Mcee	Mcee	chr7:64392770-64412119	OK	5.29	6.43	1.14	0.000117	TRUE
Pcbp2	Pcbp2	chr15:102470631-102517004	OK	3.29	4.44	1.14	0.000117	TRUE
Tssc4	Tssc4	chr7:143069367-143071087	OK	5.82	6.96	1.14	0.000117	TRUE
Ube2a	Ube2a	chrX:36874365-36884220	OK	5.84	6.97	1.14	0.000117	TRUE
Wbp4	Wbp4	chr14:79459936-79582491	OK	4.43	5.56	1.14	0.000117	TRUE
Odf3l2	Odf3l2	chr10:79639525-79645738	OK	0.18	1.32	1.14	0.0032	TRUE
Med9os	Med9os	chr11:59946891-59948147	OK	1.73	2.86	1.14	0.00464	TRUE
6430531B16Rik	6430531B16Rik	chr7:139972302-139978755	OK	0.22	1.36	1.14	0.00548	TRUE
Bsg	Bsg	chr10:79697304-80369637	OK	8.21	9.35	1.14	0.00793	TRUE
D17H6S53E	D17H6S53E	chr17:35126401-35128855	OK	-1.57	-0.43	1.14	0.0205	TRUE
Ap3s1	Ap3s1	chr18:46741875-46790826	OK	5.92	7.04	1.13	0.000117	TRUE
Ccdc12	Ccdc12	chr9:110656502-110711593	OK	6.68	7.81	1.13	0.000117	TRUE
Cenpm	Cenpm	chr15:82233775-82244747	OK	1.57	2.7	1.13	0.000117	TRUE
Exosc9	Exosc9	chr3:36552605-36571996	OK	4.99	6.12	1.13	0.000117	TRUE
Fam98c	Fam98c	chr7:29134932-29156210	OK	5.35	6.47	1.13	0.000117	TRUE
Glrx3	Glrx3	chr7:137437647-137468594	OK	5.52	6.64	1.13	0.000117	TRUE
H2afx	H2afx	chr9:44334714-44336073	OK	5.61	6.75	1.13	0.000117	TRUE
Lxn	Lxn	chr3:67430114-67475068	OK	5.74	6.87	1.13	0.000117	TRUE
Manf	Manf	chr9:106887414-106891938	OK	3.34	4.47	1.13	0.000117	TRUE
Mlf2	Mlf2	chr6:124931387-124936149	OK	9.43	10.56	1.13	0.000117	TRUE
Nap1l5	Nap1l5	chr6:58833699-58920396	OK	8.82	9.94	1.13	0.000117	TRUE
Nhp2l1	Nhp2l1	chr15:82041344-82047598	OK	7.62	8.75	1.13	0.000117	TRUE
Pgp	Pgp	chr17:24470472-24471596	OK	6.9	8.04	1.13	0.000117	TRUE
Polr3gl	Polr3gl	chr3:96577871-96594181	OK	2.58	3.71	1.13	0.000117	TRUE
Rpp30	Rpp30	chr19:36083715-36104773	OK	4.31	5.44	1.13	0.000117	TRUE
Slc9a5	Slc9a5	chr8:105348257-105369881	OK	2.28	3.41	1.13	0.000117	TRUE
Sp3os	Sp3os	chr2:72936431-72989249	OK	4.01	5.14	1.13	0.000117	TRUE
Spryd7	Spryd7	chr14:61534304-61556886	OK	5.71	6.84	1.13	0.000117	TRUE
Taf9	Taf9	chr13:100651342-100666415	OK	7.14	8.27	1.13	0.000117	TRUE
Tbcc	Tbcc	chr17:46890620-46892463	OK	5.28	6.4	1.13	0.000117	TRUE
Timm23	Timm23	chr14:32180165-32201891	OK	7.55	8.68	1.13	0.000117	TRUE
Tmem138	Tmem138	chr19:10570477-10590041	OK	3.91	5.04	1.13	0.000117	TRUE
Tmem60	Tmem60	chr5:20882452-20886870	OK	5.63	6.76	1.13	0.000117	TRUE
Ube2v1	Ube2v1	chr2:167607638-167632005	OK	8.19	9.32	1.13	0.000117	TRUE
Znrd1	Znrd1	chr17:36954357-36958428	OK	4.79	5.92	1.13	0.000117	TRUE
A230103J11Rik	A230103J11Rik	chr8:85036914-85067120	OK	3.12	4.24	1.13	0.000333	TRUE
Chst7	Chst7	chrX:20059569-20097520	OK	-0.37	0.76	1.13	0.000932	TRUE
Sema4g	Sema4g	chr19:44989343-45003395	OK	-1.47	-0.34	1.13	0.00168	TRUE
5430405H02Rik	5430405H02Rik	chr2:156840006-156862945	OK	2.9	4.02	1.12	0.000117	TRUE
Anapc10	Anapc10	chr8:79711819-79777321	OK	2.52	3.64	1.12	0.000117	TRUE
Arf6	Arf6	chr12:69372149-69375980	OK	3.96	5.08	1.12	0.000117	TRUE
Bccip	Bccip	chr7:133709332-133881532	OK	6.21	7.33	1.12	0.000117	TRUE
Cope	Cope	chr8:70302784-70312990	OK	8.09	9.21	1.12	0.000117	TRUE
Dgat1	Dgat1	chr15:76502014-76511818	OK	3.68	4.8	1.12	0.000117	TRUE
Dhodh	Dhodh	chr8:109593247-109608673	OK	4.44	5.56	1.12	0.000117	TRUE
Dlk1	Dlk1	chr12:109452822-109463336	OK	2.62	3.74	1.12	0.000117	TRUE
Ecel1	Ecel1	chr1:87147654-87156356	OK	5.37	6.49	1.12	0.000117	TRUE
Gpn3	Gpn3	chr5:122372507-122382769	OK	4.78	5.9	1.12	0.000117	TRUE
Hdhd3	Hdhd3	chr4:62499053-62502200	OK	3.96	5.09	1.12	0.000117	TRUE
Kcnk12	Kcnk12	chr17:87745820-87797994	OK	2.16	3.29	1.12	0.000117	TRUE
Magel2	Magel2	chr7:62376978-62381640	OK	0.65	1.77	1.12	0.000117	TRUE
Mrpl4	Mrpl4	chr9:21002736-21008837	OK	6.47	7.59	1.12	0.000117	TRUE
Ncald	Ncald	chr15:37366174-37792428	OK	7.26	8.38	1.12	0.000117	TRUE
Pafah1b3	Pafah1b3	chr7:25295048-25297955	OK	4.73	5.85	1.12	0.000117	TRUE
Pdcd6	Pdcd6	chr13:74303120-74317326	OK	6.47	7.59	1.12	0.000117	TRUE
Pole3	Pole3	chr4:62523800-62525014	OK	4.99	6.11	1.12	0.000117	TRUE
Polr2h	Polr2h	chr16:20717825-20722265	OK	5.22	6.35	1.12	0.000117	TRUE
Rpsa	Rpsa	chr9:120127765-120132369	OK	6.37	7.49	1.12	0.000117	TRUE
Rsl24d1	Rsl24d1	chr9:73113468-73123333	OK	5.65	6.77	1.12	0.000117	TRUE
Slc25a17	Slc25a17	chr15:81318920-81360765	OK	5.3	6.42	1.12	0.000117	TRUE
Stk33	Stk33	chr7:109279215-109439053	OK	1.19	2.32	1.12	0.000117	TRUE
Tmem126b	Tmem126b	chr7:90468828-90475995	OK	5.31	6.43	1.12	0.000117	TRUE
Tmem205	Tmem205	chr9:21921008-21935872	OK	5.28	6.4	1.12	0.000117	TRUE
Ube2e1	Ube2e1	chr14:18271141-18331844	OK	6.4	7.52	1.12	0.000117	TRUE
Apex1	Apex1	chr14:50924948-50930849	OK	4.74	5.86	1.12	0.000932	TRUE
1700028J19Rik	1700028J19Rik	chr7:44229929-44236122	OK	0.46	1.58	1.12	0.00258	TRUE
Tmem114	Tmem114	chr16:8409275-8425136	OK	-0.76	0.36	1.12	0.0168	TRUE
Cdkn3	Cdkn3	chr14:46760540-46771525	OK	0.27	1.39	1.12	0.0194	TRUE
Gm3435	Gm3435	chr17:14964188-15022449	OK	-1.08	0.04	1.12	0.0386	TRUE
0610007P14Rik	0610007P14Rik	chr12:85815454-85824545	OK	5.38	6.49	1.11	0.000117	TRUE
1810043G02Rik	1810043G02Rik	chr10:77978649-77985438	OK	5.58	6.68	1.11	0.000117	TRUE
Acot7	Acot7	chr4:152178099-152271855	OK	8.67	9.78	1.11	0.000117	TRUE
Aip	Aip	chr19:4099997-4125858	OK	6.53	7.65	1.11	0.000117	TRUE
Bri3bp	Bri3bp	chr5:125441567-125460885	OK	1.92	3.04	1.11	0.000117	TRUE
Ccdc137	Ccdc137	chr11:120458128-120467600	OK	3.96	5.07	1.11	0.000117	TRUE
Cinp	Cinp	chr12:110872609-110889145	OK	5.49	6.6	1.11	0.000117	TRUE
Clns1a	Clns1a	chr7:97696656-97720793	OK	5.5	6.61	1.11	0.000117	TRUE
Ercc1	Ercc1	chr7:19345070-19359483	OK	5.16	6.27	1.11	0.000117	TRUE
Exosc2	Exosc2	chr2:31670736-31681307	OK	4.51	5.62	1.11	0.000117	TRUE
Fam213b	Fam213b	chr4:154896429-154899043	OK	7.79	8.9	1.11	0.000117	TRUE
Guk1	Guk1	chr11:59183854-59191952	OK	8.17	9.28	1.11	0.000117	TRUE
Hax1	Hax1	chr3:89995445-89998716	OK	6.09	7.19	1.11	0.000117	TRUE
Junb	Junb	chr8:84976908-84978748	OK	5.74	6.85	1.11	0.000117	TRUE
Kcnu1	Kcnu1	chr8:25849622-25937934	OK	0.14	1.25	1.11	0.000117	TRUE
Lypla2	Lypla2	chr4:135968224-135972594	OK	6.33	7.44	1.11	0.000117	TRUE
2017-03-11	2017-03-11	chr15:26309071-26409573	OK	1.73	2.84	1.11	0.000117	TRUE
Mrps25	Mrps25	chr6:92091417-92184023	OK	3.65	4.75	1.11	0.000117	TRUE
Mrps7	Mrps7	chr11:115604150-115607624	OK	5.98	7.09	1.11	0.000117	TRUE
Naa10	Naa10	chrX:73916869-73921944	OK	5.34	6.45	1.11	0.000117	TRUE
Obfc1	Obfc1	chr19:47501047-47537020	OK	3.65	4.76	1.11	0.000117	TRUE
Psmb5	Psmb5	chr14:54614119-54617995	OK	8.45	9.55	1.11	0.000117	TRUE
Rnf220	Rnf220	chr4:117271463-117496915	OK	7.24	8.35	1.11	0.000117	TRUE
Srsf5	Srsf5	chr12:80945503-80950507	OK	7.04	8.15	1.11	0.000117	TRUE
Taf12	Taf12	chr4:132274374-132293330	OK	4.34	5.45	1.11	0.000117	TRUE
Tmem106c	Tmem106c	chr15:97964228-97970286	OK	5.54	6.64	1.11	0.000117	TRUE
Tor1a	Tor1a	chr2:30960560-30967918	OK	5.37	6.48	1.11	0.000117	TRUE
Tsen34	Tsen34	chr7:3693609-3701035	OK	6.99	8.1	1.11	0.000117	TRUE
Yy1	Yy1	chr12:108793310-108816632	OK	1.57	2.68	1.11	0.000117	TRUE
Map4k1	Map4k1	chr7:28982853-29003278	OK	-1.05	0.06	1.11	0.00398	TRUE
Pigp	Pigp	chr16:94358762-94469221	OK	5.69	6.8	1.11	0.0308	TRUE
2610035D17Rik	2610035D17Rik	chr11:113043905-113201838	OK	4.1	5.2	1.1	0.000117	TRUE
Arpc4	Arpc4	chr6:113378112-113414571	OK	6.31	7.41	1.1	0.000117	TRUE
Atp5g2	Atp5g2	chr15:102662867-102671047	OK	7.29	8.39	1.1	0.000117	TRUE
Brk1	Brk1	chr6:113604771-113616951	OK	7.94	9.04	1.1	0.000117	TRUE
Ccdc115	Ccdc115	chr1:34436669-34439672	OK	5.05	6.15	1.1	0.000117	TRUE
Commd7	Commd7	chr2:153616929-153632781	OK	4.31	5.41	1.1	0.000117	TRUE
Dpm2	Dpm2	chr2:32570857-32573571	OK	6.38	7.47	1.1	0.000117	TRUE
Eif1b	Eif1b	chr9:120492605-120495327	OK	7.01	8.11	1.1	0.000117	TRUE
Fam173b	Fam173b	chr15:31602115-31617535	OK	2.39	3.49	1.1	0.000117	TRUE
Fam195a	Fam195a	chr17:25863697-25868738	OK	4.35	5.45	1.1	0.000117	TRUE
Fhit	Fhit	chr14:9550093-11162035	OK	2.69	3.79	1.1	0.000117	TRUE
Gng13	Gng13	chr17:25717171-25727415	OK	6.54	7.64	1.1	0.000117	TRUE
Gng4	Gng4	chr13:13784058-13827895	OK	5.78	6.88	1.1	0.000117	TRUE
Gtpbp3	Gtpbp3	chr8:71488102-71493400	OK	2.54	3.64	1.1	0.000117	TRUE
H1fx	H1fx	chr6:87980420-87981482	OK	4.47	5.57	1.1	0.000117	TRUE
H2-Ke6	H2-Ke6	chr17:34026032-34028055	OK	5.67	6.78	1.1	0.000117	TRUE
Kctd2	Kctd2	chr11:115420125-115431274	OK	6.19	7.29	1.1	0.000117	TRUE
Manbal	Manbal	chr2:157367593-157396763	OK	5.77	6.88	1.1	0.000117	TRUE
Mdh2	Mdh2	chr5:135778648-135790386	OK	9.24	10.33	1.1	0.000117	TRUE
Mettl22	Mettl22	chr16:8470812-8490197	OK	5.08	6.18	1.1	0.000117	TRUE
Mok	Mok	chr12:110807797-110840939	OK	3.35	4.45	1.1	0.000117	TRUE
Ntpcr	Ntpcr	chr8:125734202-125748235	OK	4.88	5.99	1.1	0.000117	TRUE
Qtrt1	Qtrt1	chr9:21411836-21420279	OK	3.99	5.09	1.1	0.000117	TRUE
Rpp25l	Rpp25l	chr4:41712032-41713517	OK	5.21	6.31	1.1	0.000117	TRUE
Slc25a4	Slc25a4	chr8:46207340-46211009	OK	10.21	11.31	1.1	0.000117	TRUE
Trappc1	Trappc1	chr11:69323985-69325793	OK	6.39	7.49	1.1	0.000117	TRUE
Tubb5	Tubb5	chr17:35833919-35838301	OK	7.11	8.21	1.1	0.000117	TRUE
B3gnt6	B3gnt6	chr7:98192414-98199475	OK	-0.69	0.41	1.1	0.00302	TRUE
9530062K07Rik	9530062K07Rik	chr6:116199409-116207993	OK	0.76	1.86	1.1	0.00954	TRUE
Fank1	Fank1	chr7:133709332-133881532	OK	2.79	3.88	1.1	0.0204	TRUE
Cbx1	Cbx1	chr11:96789135-96808640	OK	3.4	4.49	1.09	0.000117	TRUE
Cdip1	Cdip1	chr16:4726360-4789935	OK	7.42	8.51	1.09	0.000117	TRUE
Cib2	Cib2	chr9:54545351-54560079	OK	5.6	6.69	1.09	0.000117	TRUE
Cltb	Cltb	chr13:54592938-54611272	OK	7.22	8.3	1.09	0.000117	TRUE
Cox18	Cox18	chr5:90214724-90223996	OK	4.15	5.24	1.09	0.000117	TRUE
Dctd	Dctd	chr8:48099091-48141667	OK	2.56	3.65	1.09	0.000117	TRUE
Gas5	Gas5	chr1:161035165-161038537	OK	3.12	4.21	1.09	0.000117	TRUE
Hnrnpab	Hnrnpab	chr11:51584756-51606881	OK	6.31	7.39	1.09	0.000117	TRUE
Hscb	Hscb	chr5:110829069-110839777	OK	3.05	4.13	1.09	0.000117	TRUE
Kti12	Kti12	chr4:108834677-108862119	OK	3.91	5.01	1.09	0.000117	TRUE
2017-03-02	2017-03-02	chr1:184813067-184845847	OK	4.72	5.82	1.09	0.000117	TRUE
Mrps31	Mrps31	chr8:22411339-22429665	OK	4.13	5.22	1.09	0.000117	TRUE
Mvb12a	Mvb12a	chr8:71542929-71548026	OK	4.83	5.92	1.09	0.000117	TRUE
Nt5m	Nt5m	chr11:59848072-59876533	OK	6.19	7.29	1.09	0.000117	TRUE
Pnpo	Pnpo	chr11:96937815-96944019	OK	5.96	7.05	1.09	0.000117	TRUE
Polr3k	Polr3k	chr2:181864359-181870826	OK	4.74	5.83	1.09	0.000117	TRUE
Ppib	Ppib	chr9:66060168-66069731	OK	5.02	6.1	1.09	0.000117	TRUE
Psma5	Psma5	chr3:108256925-108279952	OK	7.04	8.13	1.09	0.000117	TRUE
Rab28	Rab28	chr5:41624975-41708155	OK	6.59	7.68	1.09	0.000117	TRUE
Scamp4	Scamp4	chr10:80602879-80615783	OK	6.16	7.25	1.09	0.000117	TRUE
Spag7	Spag7	chr11:70663768-70669416	OK	6.98	8.06	1.09	0.000117	TRUE
Stoml2	Stoml2	chr4:43027689-43031384	OK	6.29	7.38	1.09	0.000117	TRUE
Tmbim4	Tmbim4	chr10:120208825-120224897	OK	6.3	7.39	1.09	0.000117	TRUE
Tmem116	Tmem116	chr5:121452708-121495421	OK	1.7	2.78	1.09	0.000117	TRUE
Tmem222	Tmem222	chr4:133266044-133277790	OK	6.56	7.65	1.09	0.000117	TRUE
Trappc6b	Trappc6b	chr12:59043091-59061472	OK	7.11	8.2	1.09	0.000117	TRUE
U2af1l4	U2af1l4	chr7:30563339-30565364	OK	6.5	7.59	1.09	0.000117	TRUE
Uqcrfs1	Uqcrfs1	chr13:30540311-30545316	OK	7.49	8.57	1.09	0.000117	TRUE
Vill	Vill	chr9:119052777-119071525	OK	0.88	1.97	1.09	0.000117	TRUE
Zfand1	Zfand1	chr3:10339955-10351301	OK	4.31	5.41	1.09	0.000117	TRUE
Nkapl	Nkapl	chr13:21467046-21468501	OK	-0.24	0.85	1.09	0.0068	TRUE
Mgmt	Mgmt	chr7:136894610-137128188	OK	0.53	1.62	1.09	0.0107	TRUE
2010012O05Rik	2010012O05Rik	chr19:46689905-46703382	OK	4.19	5.27	1.08	0.000117	TRUE
Asna1	Asna1	chr8:85017930-85025278	OK	6.14	7.22	1.08	0.000117	TRUE
BC003965	BC003965	chr17:25184560-25187662	OK	4.19	5.27	1.08	0.000117	TRUE
Bnip3	Bnip3	chr7:138890835-138909506	OK	7.45	8.53	1.08	0.000117	TRUE
Cdk5	Cdk5	chr5:24418241-24423530	OK	6.69	7.77	1.08	0.000117	TRUE
Dut	Dut	chr2:125247247-125259049	OK	4.25	5.33	1.08	0.000117	TRUE
Eif3k	Eif3k	chr7:28971371-28981888	OK	6.85	7.93	1.08	0.000117	TRUE
Fam32a	Fam32a	chr8:72219729-72223775	OK	6.53	7.6	1.08	0.000117	TRUE
Fbxo9	Fbxo9	chr9:78081499-78109065	OK	6.82	7.9	1.08	0.000117	TRUE
Gipc2	Gipc2	chr3:152093840-152165900	OK	1.35	2.43	1.08	0.000117	TRUE
Haghl	Haghl	chr17:25773775-25785586	OK	6.94	8.01	1.08	0.000117	TRUE
Hn1	Hn1	chr11:115497352-115514370	OK	7.12	8.2	1.08	0.000117	TRUE
Hnrnpa0	Hnrnpa0	chr13:58125878-58128556	OK	1.55	2.63	1.08	0.000117	TRUE
Ino80e	Ino80e	chr7:126847552-126861463	OK	5.38	6.46	1.08	0.000117	TRUE
Qpct	Qpct	chr17:79051905-79090243	OK	3.9	4.98	1.08	0.000117	TRUE
Rbfa	Rbfa	chr18:80186238-80200619	OK	5.49	6.57	1.08	0.000117	TRUE
Rprm	Rprm	chr2:54084092-54085552	OK	4.43	5.51	1.08	0.000117	TRUE
Rsrc2	Rsrc2	chr5:123728425-123749414	OK	4.67	5.76	1.08	0.000117	TRUE
Rtf1	Rtf1	chr2:119675067-119735407	OK	2.83	3.91	1.08	0.000117	TRUE
Samd14	Samd14	chr11:95009878-95026087	OK	4.31	5.39	1.08	0.000117	TRUE
Sdhaf2	Sdhaf2	chr19:10500511-10525209	OK	4.48	5.56	1.08	0.000117	TRUE
Ssbp1	Ssbp1	chr6:40471414-40481823	OK	4.58	5.65	1.08	0.000117	TRUE
Tatdn3	Tatdn3	chr1:191045829-191062932	OK	2.96	4.04	1.08	0.000117	TRUE
Tecr	Tecr	chr8:83571697-83594491	OK	9.08	10.17	1.08	0.000117	TRUE
Ube2b	Ube2b	chr11:51985145-52000466	OK	6.94	8.02	1.08	0.000117	TRUE
Vps25	Vps25	chr11:101253706-101259547	OK	6.67	7.75	1.08	0.000117	TRUE
Zcrb1	Zcrb1	chr15:93386112-93398290	OK	6.37	7.45	1.08	0.000117	TRUE
Ncmap	Ncmap	chr4:135369576-135398227	OK	0.65	1.73	1.08	0.000227	TRUE
Cks2	Cks2	chr13:51645231-51650662	OK	1.51	2.59	1.08	0.00372	TRUE
LOC100504703	LOC100504703	chr10:127070480-127071101	OK	2.67	3.75	1.08	0.0183	TRUE
Zfp389	Zfp389	chr13:21504315-21506524	OK	-0.1	0.98	1.08	0.0207	TRUE
0610037L13Rik	0610037L13Rik	chr4:107889898-107897802	OK	4.98	6.04	1.07	0.000117	TRUE
2210406O10Rik	2210406O10Rik	chr5:36447610-36464854	OK	2.18	3.24	1.07	0.000117	TRUE
2900011O08Rik	2900011O08Rik	chr16:13981701-14101494	OK	7.74	8.81	1.07	0.000117	TRUE
BC022687	BC022687	chr12:112808974-112816245	OK	3.99	5.05	1.07	0.000117	TRUE
Cbr1	Cbr1	chr16:93607836-93610349	OK	6.63	7.71	1.07	0.000117	TRUE
Cdk2ap2	Cdk2ap2	chr19:4097350-4099017	OK	6.22	7.29	1.07	0.000117	TRUE
Commd5	Commd5	chr15:76899940-76901297	OK	4.96	6.03	1.07	0.000117	TRUE
Egr4	Egr4	chr6:85511121-85513542	OK	4.66	5.73	1.07	0.000117	TRUE
Gdpd2	Gdpd2	chrX:100729846-100738901	OK	1.35	2.41	1.07	0.000117	TRUE
Mlx	Mlx	chr11:101087289-101095435	OK	5.01	6.08	1.07	0.000117	TRUE
Mnat1	Mnat1	chr12:73123716-73273988	OK	2.79	3.86	1.07	0.000117	TRUE
Mtx2	Mtx2	chr2:74825811-74876748	OK	6.14	7.21	1.07	0.000117	TRUE
Nsa2	Nsa2	chr13:97067286-97137926	OK	2.88	3.94	1.07	0.000117	TRUE
Polr2c	Polr2c	chr8:94857449-94876312	OK	6.45	7.53	1.07	0.000117	TRUE
Ppp4c	Ppp4c	chr7:126785867-126792471	OK	6.14	7.21	1.07	0.000117	TRUE
Psma2	Psma2	chr13:14613241-14625673	OK	7.98	9.05	1.07	0.000117	TRUE
Rabepk	Rabepk	chr2:34778665-34799912	OK	4.58	5.64	1.07	0.000117	TRUE
Smyd2	Smyd2	chr1:189880491-189922288	OK	5.98	7.05	1.07	0.000117	TRUE
Ssb	Ssb	chr2:69861561-69885615	OK	5.61	6.68	1.07	0.000117	TRUE
Taf11	Taf11	chr17:27901127-27907724	OK	5.23	6.31	1.07	0.000117	TRUE
Tmem17	Tmem17	chr11:22512282-22519231	OK	3.01	4.08	1.07	0.000117	TRUE
Tmem191c	Tmem191c	chr16:17276299-17278661	OK	6.31	7.38	1.07	0.000117	TRUE
Tram1l1	Tram1l1	chr3:124321036-124323260	OK	4.98	6.06	1.07	0.000117	TRUE
Trnau1ap	Trnau1ap	chr4:132311762-132329538	OK	5.13	6.21	1.07	0.000117	TRUE
Tusc2	Tusc2	chr9:107563254-107566108	OK	7.3	8.37	1.07	0.000117	TRUE
Ubxn11	Ubxn11	chr4:134102582-134126780	OK	3.46	4.54	1.07	0.000117	TRUE
Uqcc3	Uqcc3	chr19:8880013-8880933	OK	5.47	6.54	1.07	0.000117	TRUE
Usp29	Usp29	chr7:6730582-6976662	OK	1.48	2.55	1.07	0.000117	TRUE
Zfp575	Zfp575	chr7:24583837-24608926	OK	2.52	3.59	1.07	0.000117	TRUE
Zfpl1	Zfpl1	chr19:6080037-6084891	OK	5.42	6.49	1.07	0.000117	TRUE
1810037I17Rik	1810037I17Rik	chr3:122924396-122926194	OK	6.29	7.35	1.06	0.000117	TRUE
2810006K23Rik	2810006K23Rik	chr5:124328088-124341852	OK	3.75	4.8	1.06	0.000117	TRUE
3110082I17Rik	3110082I17Rik	chr5:139359738-139460534	OK	3.92	4.98	1.06	0.000117	TRUE
A230050P20Rik	A230050P20Rik	chr9:20868641-20879710	OK	5.61	6.67	1.06	0.000117	TRUE
Akr1a1	Akr1a1	chr4:116636509-116651674	OK	8.93	9.99	1.06	0.000117	TRUE
Ccdc61	Ccdc61	chr7:18890883-18910404	OK	2.98	4.04	1.06	0.000117	TRUE
Cdc26	Cdc26	chr4:62394588-62408623	OK	4.79	5.85	1.06	0.000117	TRUE
Cebpb	Cebpb	chr2:167688914-167690432	OK	3.7	4.77	1.06	0.000117	TRUE
Dynll2	Dynll2	chr11:87979524-87998298	OK	4.52	5.58	1.06	0.000117	TRUE
Eif3f	Eif3f	chr7:108934414-108941942	OK	5.33	6.39	1.06	0.000117	TRUE
Eif3g	Eif3g	chr9:20894348-20898590	OK	7.1	8.16	1.06	0.000117	TRUE
Elp5	Elp5	chr11:69968225-69990600	OK	6.69	7.76	1.06	0.000117	TRUE
Etfb	Etfb	chr7:43444071-43457800	OK	6.85	7.9	1.06	0.000117	TRUE
Fam136a	Fam136a	chr6:86365682-86370058	OK	5.79	6.86	1.06	0.000117	TRUE
Fam174a	Fam174a	chr1:95313627-95335284	OK	5.84	6.9	1.06	0.000117	TRUE
Fuom	Fuom	chr7:140097814-140102441	OK	3.49	4.55	1.06	0.000117	TRUE
Gm5424	Gm5424	chr2:31470269-31520670	OK	4.43	5.49	1.06	0.000117	TRUE
Gstp1	Gstp1	chr19:4035410-4037912	OK	8.58	9.64	1.06	0.000117	TRUE
Hapln4	Hapln4	chr8:70083528-70090862	OK	4.35	5.41	1.06	0.000117	TRUE
Htra2	Htra2	chr6:83034223-83057682	OK	4.68	5.73	1.06	0.000117	TRUE
Nutf2	Nutf2	chr8:105860633-105880401	OK	5.56	6.62	1.06	0.000117	TRUE
Oaz2	Oaz2	chr9:65676547-65690300	OK	8.06	9.11	1.06	0.000117	TRUE
Ogfod2	Ogfod2	chr5:124112337-124115476	OK	5.15	6.21	1.06	0.000117	TRUE
Pfn2	Pfn2	chr3:57841894-57847757	OK	8.45	9.51	1.06	0.000117	TRUE
Pycrl	Pycrl	chr15:75916462-75921560	OK	5.19	6.24	1.06	0.000117	TRUE
Serbp1	Serbp1	chr6:67266978-67289302	OK	3.97	5.02	1.06	0.000117	TRUE
Snx8	Snx8	chr5:140340302-140389247	OK	3.11	4.17	1.06	0.000117	TRUE
Wbp11	Wbp11	chr6:136813653-136828216	OK	5.11	6.16	1.06	0.000117	TRUE
Yipf4	Yipf4	chr17:74489492-74500277	OK	4.95	6	1.06	0.000117	TRUE
Zbtb48	Zbtb48	chr4:152019775-152027671	OK	2.53	3.59	1.06	0.000117	TRUE
Gm11744	Gm11744	chr11:116657107-116668389	OK	2.13	3.19	1.06	0.000333	TRUE
Ccdc167	Ccdc167	chr17:29614788-29717017	OK	3.22	4.28	1.06	0.01	TRUE
Tnfrsf8	Tnfrsf8	chr4:145268975-145315147	OK	-0.76	0.3	1.06	0.0168	TRUE
Ggnbp1	Ggnbp1	chr17:27018034-27036378	OK	-0.28	0.78	1.06	0.0445	TRUE
1110008F13Rik	1110008F13Rik	chr2:156863121-156887078	OK	5.04	6.1	1.05	0.000117	TRUE
AI837181	AI837181	chr19:5425143-5427316	OK	5.39	6.44	1.05	0.000117	TRUE
Ankrd9	Ankrd9	chr12:110975352-110979021	OK	3.11	4.16	1.05	0.000117	TRUE
Arl6ip5	Arl6ip5	chr6:97210791-97233315	OK	5.32	6.37	1.05	0.000117	TRUE
Atg101	Atg101	chr15:101284300-101290934	OK	6.12	7.18	1.05	0.000117	TRUE
Cbwd1	Cbwd1	chr19:24919915-24961616	OK	2.58	3.63	1.05	0.000117	TRUE
Cntnap2	Cntnap2	chr6:45060060-47301371	OK	3.49	4.53	1.05	0.000117	TRUE
Denr	Denr	chr5:123907274-123928832	OK	5.76	6.81	1.05	0.000117	TRUE
Eif2s2	Eif2s2	chr2:154871409-154892906	OK	4.64	5.68	1.05	0.000117	TRUE
Fbxl21	Fbxl21	chr13:56522507-56537786	OK	0.88	1.93	1.05	0.000117	TRUE
Gabarap	Gabarap	chr11:69991369-69994949	OK	7.54	8.59	1.05	0.000117	TRUE
Gpr135	Gpr135	chr12:72069617-72070991	OK	3.34	4.39	1.05	0.000117	TRUE
Hcrtr1	Hcrtr1	chr4:130130216-130139162	OK	0.88	1.93	1.05	0.000117	TRUE
Hddc3	Hddc3	chr7:80343136-80346097	OK	5.44	6.49	1.05	0.000117	TRUE
Lmo2	Lmo2	chr2:103957994-103981878	OK	5.37	6.42	1.05	0.000117	TRUE
Med10	Med10	chr13:69809881-69816094	OK	5.87	6.91	1.05	0.000117	TRUE
Mrpl49	Mrpl49	chr19:6046575-6057751	OK	5.59	6.64	1.05	0.000117	TRUE
Myg1	Myg1	chr15:102331708-102338138	OK	5.12	6.17	1.05	0.000117	TRUE
Ncbp2	Ncbp2	chr16:31948545-31958472	OK	5.48	6.53	1.05	0.000117	TRUE
Npdc1	Npdc1	chr2:25403049-25409494	OK	7.07	8.12	1.05	0.000117	TRUE
Ntmt1	Ntmt1	chr2:30807976-30823014	OK	5.8	6.85	1.05	0.000117	TRUE
Nudt17	Nudt17	chr3:96696374-96708560	OK	3.57	4.62	1.05	0.000117	TRUE
Nudt18	Nudt18	chr14:70577846-70582571	OK	4.94	5.99	1.05	0.000117	TRUE
Psma6	Psma6	chr12:55280813-55492647	OK	7.52	8.57	1.05	0.000117	TRUE
Psmb2	Psmb2	chr4:126677642-126709715	OK	7.93	8.98	1.05	0.000117	TRUE
Ptges3	Ptges3	chr10:128058981-128077254	OK	6.22	7.27	1.05	0.000117	TRUE
Pts	Pts	chr9:50521616-50528641	OK	5.33	6.38	1.05	0.000117	TRUE
Rab3a	Rab3a	chr8:70754678-70760921	OK	9.41	10.46	1.05	0.000117	TRUE
Ran	Ran	chr5:129020155-129024321	OK	7.46	8.51	1.05	0.000117	TRUE
Sap18	Sap18	chr14:57798188-57804980	OK	5.02	6.07	1.05	0.000117	TRUE
Sh3bgrl3	Sh3bgrl3	chr4:134127405-134128753	OK	8.92	9.98	1.05	0.000117	TRUE
Spa17	Spa17	chr9:37603293-37613720	OK	2.83	3.88	1.05	0.000117	TRUE
Suclg1	Suclg1	chr6:73248504-73276907	OK	7.46	8.5	1.05	0.000117	TRUE
Tmem50a	Tmem50a	chr4:134897848-134914916	OK	6.65	7.7	1.05	0.000117	TRUE
Zfp239	Zfp239	chr6:117863076-117872766	OK	5.06	6.11	1.05	0.000117	TRUE
4930555G01Rik	4930555G01Rik	chr14:5050628-5059243	OK	-0.85	0.19	1.05	0.0127	TRUE
Mroh5	Mroh5	chr15:73786935-73839671	OK	-1.12	-0.07	1.05	0.0158	TRUE
4732491K20Rik	4732491K20Rik	chr17:12318852-12327250	OK	1.22	2.26	1.04	0.000117	TRUE
BC037034	BC037034	chr5:138259657-138272754	OK	3.12	4.16	1.04	0.000117	TRUE
Bcap29	Bcap29	chr12:31595353-31634658	OK	5.15	6.19	1.04	0.000117	TRUE
C1qtnf4	C1qtnf4	chr2:90885785-90890526	OK	6.45	7.49	1.04	0.000117	TRUE
Cdo1	Cdo1	chr18:46713204-46728342	OK	5.61	6.65	1.04	0.000117	TRUE
Chst10	Chst10	chr1:38863872-38898160	OK	5.24	6.28	1.04	0.000117	TRUE
Coq5	Coq5	chr5:115279701-115296972	OK	5.5	6.54	1.04	0.000117	TRUE
Dnajc4	Dnajc4	chr19:6987910-6992272	OK	4.39	5.43	1.04	0.000117	TRUE
Egfl7	Egfl7	chr2:26581055-26592682	OK	4.41	5.45	1.04	0.000117	TRUE
Exosc7	Exosc7	chr9:123113230-123136129	OK	5.96	7	1.04	0.000117	TRUE
F8a	F8a	chrX:73228305-73230795	OK	3.75	4.79	1.04	0.000117	TRUE
Fibcd1	Fibcd1	chr2:31813289-31846005	OK	2.14	3.18	1.04	0.000117	TRUE
Gt(ROSA)26Sor	Gt(ROSA)26Sor	chr6:113046326-113077244	OK	4.34	5.39	1.04	0.000117	TRUE
Hmga1-rs1	Hmga1-rs1	chr17:27556573-27563672	OK	5.08	6.11	1.04	0.000117	TRUE
Ift27	Ift27	chr15:78159462-78174108	OK	5.43	6.47	1.04	0.000117	TRUE
Jkamp	Jkamp	chr12:72085838-72185029	OK	5.38	6.42	1.04	0.000117	TRUE
Matk	Matk	chr10:81252934-81262981	OK	7.06	8.1	1.04	0.000117	TRUE
Mc4r	Mc4r	chr18:66857704-66860487	OK	0.49	1.52	1.04	0.000117	TRUE
Mir22hg	Mir22hg	chr11:75461538-75466690	OK	4.51	5.55	1.04	0.000117	TRUE
Mrps35	Mrps35	chr6:147042769-147070902	OK	4.83	5.87	1.04	0.000117	TRUE
Mrto4	Mrto4	chr4:139347439-139352576	OK	5.13	6.17	1.04	0.000117	TRUE
Ormdl3	Ormdl3	chr11:98581293-98587245	OK	5.4	6.44	1.04	0.000117	TRUE
Pdf	Pdf	chr8:107046289-107048614	OK	5.6	6.64	1.04	0.000117	TRUE
Pfdn2	Pfdn2	chr1:171345698-171358170	OK	7.57	8.61	1.04	0.000117	TRUE
Psip1	Psip1	chr4:83455680-83486448	OK	6.92	7.96	1.04	0.000117	TRUE
Pwwp2b	Pwwp2b	chr7:139248481-139267253	OK	4.04	5.08	1.04	0.000117	TRUE
Rpl4	Rpl4	chr9:64173386-64178562	OK	7.81	8.85	1.04	0.000117	TRUE
Scamp3	Scamp3	chr3:89164794-89182770	OK	5.3	6.34	1.04	0.000117	TRUE
Scn5a	Scn5a	chr9:119483407-119579016	OK	-0.9	0.15	1.04	0.000117	TRUE
2017-09-15	2017-09-15	chr3:144570426-144597676	OK	7.32	8.36	1.04	0.000117	TRUE
Slc25a5	Slc25a5	chrX:36795596-36798808	OK	9.17	10.21	1.04	0.000117	TRUE
Uros	Uros	chr7:133686354-133709295	OK	5	6.04	1.04	0.000117	TRUE
Vti1b	Vti1b	chr12:79130787-79172458	OK	8.11	9.16	1.04	0.000117	TRUE
Zc3h15	Zc3h15	chr2:83644577-83664616	OK	5.85	6.88	1.04	0.000117	TRUE
Zfp811	Zfp811	chr17:32795675-32809931	OK	2.09	3.13	1.04	0.000117	TRUE
1700052K11Rik	1700052K11Rik	chr11:105178806-105283959	OK	2.07	3.11	1.04	0.000436	TRUE
Ccdc159	Ccdc159	chr9:21921008-21935872	OK	1.67	2.71	1.04	0.00737	TRUE
Rnf144b	Rnf144b	chr13:47122719-47247991	OK	-1.55	-0.51	1.04	0.0117	TRUE
0610009L18Rik	0610009L18Rik	chr11:120348677-120351190	OK	3.48	4.51	1.03	0.000117	TRUE
2700062C07Rik	2700062C07Rik	chr18:24470870-24477767	OK	4.79	5.82	1.03	0.000117	TRUE
Akr7a5	Akr7a5	chr4:139310743-139318786	OK	5.08	6.11	1.03	0.000117	TRUE
Bcl2l2	Bcl2l2	chr14:54883424-54888234	OK	1.66	2.69	1.03	0.000117	TRUE
Cops6	Cops6	chr5:138161101-138163984	OK	8.45	9.49	1.03	0.000117	TRUE
Cyb5rl	Cyb5rl	chr4:107070167-107084805	OK	1.88	2.92	1.03	0.000117	TRUE
Eri3	Eri3	chr4:117550323-117674297	OK	8.1	9.12	1.03	0.000117	TRUE
Gm5617	Gm5617	chr9:48495342-48495975	OK	3.42	4.45	1.03	0.000117	TRUE
Gpr150	Gpr150	chr13:76054850-76056996	OK	1	2.03	1.03	0.000117	TRUE
Gstm6	Gstm6	chr3:107938847-107943749	OK	4.44	5.48	1.03	0.000117	TRUE
Khk	Khk	chr5:30921894-30931246	OK	3	4.03	1.03	0.000117	TRUE
Larp7	Larp7	chr3:127536713-127553349	OK	3.4	4.43	1.03	0.000117	TRUE
Lcmt1	Lcmt1	chr7:123377981-123430358	OK	6.39	7.42	1.03	0.000117	TRUE
Leng9	Leng9	chr7:4148182-4149872	OK	3.29	4.31	1.03	0.000117	TRUE
Meaf6	Meaf6	chr4:125085133-125110070	OK	5.46	6.49	1.03	0.000117	TRUE
Mrps18b	Mrps18b	chr17:35910384-35916369	OK	5.87	6.9	1.03	0.000117	TRUE
Ndufs3	Ndufs3	chr2:90894635-90904721	OK	7.78	8.82	1.03	0.000117	TRUE
Pdap1	Pdap1	chr5:145128769-145140089	OK	4.12	5.15	1.03	0.000117	TRUE
Pianp	Pianp	chr6:124996719-125003097	OK	5.09	6.13	1.03	0.000117	TRUE
Pqlc1	Pqlc1	chr18:80255244-80292724	OK	4.17	5.19	1.03	0.000117	TRUE
Psmb7	Psmb7	chr2:38588045-38643906	OK	7.06	8.09	1.03	0.000117	TRUE
Rhof	Rhof	chr5:123118179-123132629	OK	5.33	6.37	1.03	0.000117	TRUE
Ric3	Ric3	chr7:109010879-109083324	OK	3.45	4.47	1.03	0.000117	TRUE
Rita1	Rita1	chr5:120609059-120612589	OK	4.39	5.42	1.03	0.000117	TRUE
Rnaseh2a	Rnaseh2a	chr8:84956609-84966011	OK	3.76	4.79	1.03	0.000117	TRUE
Scn2b	Scn2b	chr9:45079182-45135606	OK	3.27	4.3	1.03	0.000117	TRUE
Serf2	Serf2	chr2:121449197-121456764	OK	5.41	6.45	1.03	0.000117	TRUE
Shf	Shf	chr2:122348891-122368918	OK	3.81	4.85	1.03	0.000117	TRUE
Slc7a6os	Slc7a6os	chr8:106200437-106210933	OK	3.73	4.76	1.03	0.000117	TRUE
Smarcd3	Smarcd3	chr5:24592621-24602002	OK	7.13	8.16	1.03	0.000117	TRUE
Smim19	Smim19	chr8:22462613-22569616	OK	5.23	6.26	1.03	0.000117	TRUE
Srrd	Srrd	chr5:112326368-112343040	OK	5.29	6.32	1.03	0.000117	TRUE
Surf1	Surf1	chr2:26913377-26933511	OK	6.38	7.4	1.03	0.000117	TRUE
Timm22	Timm22	chr11:76406924-76416313	OK	4.87	5.9	1.03	0.000117	TRUE
Tmem179	Tmem179	chr12:112500183-112511160	OK	6.81	7.84	1.03	0.000117	TRUE
Tubg2	Tubg2	chr11:101155883-101161787	OK	6.2	7.22	1.03	0.000117	TRUE
Ube2n	Ube2n	chr10:95515161-95545658	OK	6.35	7.38	1.03	0.000117	TRUE
Utp11l	Utp11l	chr4:124678763-124693554	OK	4.58	5.6	1.03	0.000117	TRUE
Zfp580	Zfp580	chr7:5051531-5053723	OK	4.75	5.77	1.03	0.000117	TRUE
Gm2694	Gm2694	chr8:87472811-87525554	OK	3.43	4.46	1.03	0.000637	TRUE
AI467606	AI467606	chr7:127091435-127094049	OK	-0.1	0.93	1.03	0.00372	TRUE
Stk16	Stk16	chr1:75210828-75219253	OK	4.57	5.6	1.03	0.023	TRUE
Ltb	Ltb	chr17:35194506-35196305	OK	-0.32	0.71	1.03	0.0265	TRUE
2610020H08Rik	2610020H08Rik	chr7:119794129-119848941	OK	-1.62	-0.59	1.03	0.0465	TRUE
Aamdc	Aamdc	chr7:97550330-97579497	OK	5.81	6.84	1.02	0.000117	TRUE
Acer2	Acer2	chr4:86874413-86932490	OK	2.33	3.35	1.02	0.000117	TRUE
Alyref	Alyref	chr11:120594515-120598365	OK	6.08	7.1	1.02	0.000117	TRUE
Atxn7l1	Atxn7l1	chr12:33302514-33394760	OK	4.24	5.26	1.02	0.000117	TRUE
Bbip1	Bbip1	chr19:53892230-54033278	OK	4.38	5.4	1.02	0.000117	TRUE
Bnip1	Bnip1	chr17:26781078-26792521	OK	4.41	5.43	1.02	0.000117	TRUE
Cadm1	Cadm1	chr9:47530351-47853385	OK	5.54	6.56	1.02	0.000117	TRUE
Cbx8	Cbx8	chr11:119038435-119040913	OK	3.57	4.59	1.02	0.000117	TRUE
Cgref1	Cgref1	chr5:30933142-30945480	OK	5.38	6.4	1.02	0.000117	TRUE
Clta	Clta	chr4:44012642-44032848	OK	7.13	8.14	1.02	0.000117	TRUE
Csf2ra	Csf2ra	chr19:61224401-61228418	OK	2.59	3.61	1.02	0.000117	TRUE
Eef1g	Eef1g	chr19:8967040-8978180	OK	6.71	7.73	1.02	0.000117	TRUE
Eny2	Eny2	chr15:44375226-44437685	OK	4.78	5.8	1.02	0.000117	TRUE
Fra10ac1	Fra10ac1	chr19:38188478-38224132	OK	3.94	4.95	1.02	0.000117	TRUE
Fzd8	Fzd8	chr18:9212855-9216201	OK	0.21	1.23	1.02	0.000117	TRUE
Hnrnpa3	Hnrnpa3	chr2:75659258-75669407	OK	2.51	3.53	1.02	0.000117	TRUE
Mrps23	Mrps23	chr11:88098057-88211507	OK	5.18	6.21	1.02	0.000117	TRUE
Ndufaf1	Ndufaf1	chr2:119655450-119662798	OK	5.09	6.12	1.02	0.000117	TRUE
Nme4	Nme4	chr17:26091744-26095470	OK	2.52	3.54	1.02	0.000117	TRUE
Pcsk1n	Pcsk1n	chrX:7919821-7928607	OK	7.7	8.72	1.02	0.000117	TRUE
Ptrhd1	Ptrhd1	chr12:4133396-4240123	OK	2.29	3.31	1.02	0.000117	TRUE
Rpl7l1	Rpl7l1	chr17:46773906-46782656	OK	5.21	6.23	1.02	0.000117	TRUE
Sf3b4	Sf3b4	chr3:96172505-96177564	OK	5.83	6.84	1.02	0.000117	TRUE
Slc25a14	Slc25a14	chrX:48623577-48662298	OK	5.78	6.79	1.02	0.000117	TRUE
Snapc1	Snapc1	chr12:73964529-73984820	OK	3.88	4.9	1.02	0.000117	TRUE
Timm17b	Timm17b	chrX:7899397-7907652	OK	4.6	5.61	1.02	0.000117	TRUE
Top1	Top1	chr2:160645896-160722763	OK	2.95	3.97	1.02	0.000117	TRUE
Rpain	Rpain	chr11:70970199-70983026	OK	4.17	5.18	1.02	0.00223	TRUE
Urah	Urah	chr7:140835495-140846769	OK	0.86	1.88	1.02	0.0205	TRUE
0610009B22Rik	0610009B22Rik	chr11:51685384-51688634	OK	5.52	6.53	1.01	0.000117	TRUE
2510002D24Rik	2510002D24Rik	chr16:18836579-18840113	OK	4.93	5.94	1.01	0.000117	TRUE
Alkbh6	Alkbh6	chr7:30308752-30314303	OK	6.21	7.22	1.01	0.000117	TRUE
Atn1	Atn1	chr6:124742543-124756487	OK	1.99	3	1.01	0.000117	TRUE
Chmp2a	Chmp2a	chr7:13032005-13034777	OK	7.42	8.43	1.01	0.000117	TRUE
Chmp4b	Chmp4b	chr2:154657025-154694783	OK	3.2	4.2	1.01	0.000117	TRUE
Chmp5	Chmp5	chr4:40948552-40965302	OK	6.74	7.74	1.01	0.000117	TRUE
Cnih1	Cnih1	chr14:46775567-46788357	OK	5.79	6.8	1.01	0.000117	TRUE
Dtwd1	Dtwd1	chr2:126152140-126165277	OK	4.12	5.13	1.01	0.000117	TRUE
Dtymk	Dtymk	chr1:93792575-93801934	OK	5.28	6.3	1.01	0.000117	TRUE
Eef1a1	Eef1a1	chr9:78478453-78481724	OK	8.58	9.59	1.01	0.000117	TRUE
Eid1	Eid1	chr2:125627446-125724148	OK	6.65	7.66	1.01	0.000117	TRUE
Fam220a	Fam220a	chr5:143548705-143564525	OK	2.84	3.84	1.01	0.000117	TRUE
Fbxo16	Fbxo16	chr14:65266700-65321502	OK	3.3	4.31	1.01	0.000117	TRUE
Fkbp8	Fkbp8	chr8:70527742-70535328	OK	8.45	9.46	1.01	0.000117	TRUE
Gfod2	Gfod2	chr8:105716112-105758607	OK	4.64	5.65	1.01	0.000117	TRUE
Gfra1	Gfra1	chr19:58235580-58455398	OK	3.27	4.28	1.01	0.000117	TRUE
Gpx1	Gpx1	chr9:108339079-108340344	OK	7.56	8.57	1.01	0.000117	TRUE
Grin2d	Grin2d	chr7:45832482-45866681	OK	1.44	2.45	1.01	0.000117	TRUE
Hspa1a	Hspa1a	chr17:34969358-34972156	OK	0.73	1.74	1.01	0.000117	TRUE
Ip6k2	Ip6k2	chr9:108795993-108806333	OK	2.31	3.31	1.01	0.000117	TRUE
Mpnd	Mpnd	chr17:56009200-56036637	OK	6.9	7.92	1.01	0.000117	TRUE
Nudt2	Nudt2	chr4:41465147-41480926	OK	5.08	6.08	1.01	0.000117	TRUE
Pef1	Pef1	chr4:130107555-130128134	OK	6.62	7.63	1.01	0.000117	TRUE
Pno1	Pno1	chr11:17203199-17211589	OK	4.27	5.28	1.01	0.000117	TRUE
Prnp	Prnp	chr2:131909927-131956131	OK	8.85	9.86	1.01	0.000117	TRUE
Psmg2	Psmg2	chr18:67641598-67654162	OK	5.14	6.15	1.01	0.000117	TRUE
Rap2b	Rap2b	chr3:61364506-61368703	OK	2.93	3.93	1.01	0.000117	TRUE
Rfesd	Rfesd	chr13:76001534-76018712	OK	3.37	4.38	1.01	0.000117	TRUE
Sec22a	Sec22a	chr16:35311130-35363918	OK	3.13	4.14	1.01	0.000117	TRUE
Tmem218	Tmem218	chr9:37208222-37223228	OK	4.3	5.31	1.01	0.000117	TRUE
Tmx2	Tmx2	chr2:84671310-84715164	OK	7.63	8.64	1.01	0.000117	TRUE
Tstd3	Tstd3	chr4:21727700-21767211	OK	4.63	5.64	1.01	0.000117	TRUE
Tyw5	Tyw5	chr1:57388243-57415958	OK	3.15	4.16	1.01	0.000117	TRUE
1500012F01Rik	1500012F01Rik	chr2:167035795-167065862	OK	3.86	4.87	1.01	0.000537	TRUE
9330162012Rik	9330162012Rik	chr13:24905599-24939049	OK	1.73	2.75	1.01	0.00422	TRUE
Fam71e1	Fam71e1	chr7:44496587-44501134	OK	1.01	2.02	1.01	0.00574	TRUE
Oscar	Oscar	chr7:3609814-3616157	OK	-0.53	0.48	1.01	0.00688	TRUE
Tatdn2	Tatdn2	chr6:113697498-113711068	OK	-1.5	-0.5	1.01	0.0176	TRUE
Arglu1	Arglu1	chr8:8666575-8690537	OK	3.55	4.55	1	0.000117	TRUE
Auh	Auh	chr13:52835109-52929677	OK	6.45	7.45	1	0.000117	TRUE
Bloc1s6	Bloc1s6	chr2:122738504-122749487	OK	4.39	5.39	1	0.000117	TRUE
Carkd	Carkd	chr8:11497505-11513286	OK	6.18	7.17	1	0.000117	TRUE
Commd6	Commd6	chr14:101633765-101640471	OK	5.76	6.77	1	0.000117	TRUE
Fam89b	Fam89b	chr19:5728086-5729666	OK	5.47	6.48	1	0.000117	TRUE
Gemin7	Gemin7	chr7:19564948-19573343	OK	6.41	7.41	1	0.000117	TRUE
Mrpl18	Mrpl18	chr17:12911354-12916091	OK	6.73	7.72	1	0.000117	TRUE
Nudt22	Nudt22	chr19:6993018-6996037	OK	3.25	4.26	1	0.000117	TRUE
Pabpn1	Pabpn1	chr14:54894142-54898927	OK	5.72	6.71	1	0.000117	TRUE
Pcmt1	Pcmt1	chr10:7630235-7664623	OK	6.85	7.84	1	0.000117	TRUE
Pdcd7	Pdcd7	chr9:65346067-65359643	OK	4.16	5.16	1	0.000117	TRUE
Pnmal2	Pnmal2	chr7:16944681-16948828	OK	5.47	6.48	1	0.000117	TRUE
Ppa1	Ppa1	chr10:61648620-61674165	OK	6.88	7.87	1	0.000117	TRUE
Ppif	Ppif	chr14:25694169-25701282	OK	5.19	6.2	1	0.000117	TRUE
Rexo2	Rexo2	chr9:48468513-48480611	OK	6.17	7.17	1	0.000117	TRUE
Rnaseh2b	Rnaseh2b	chr14:62332104-62372992	OK	2.84	3.85	1	0.000117	TRUE
Sepw1	Sepw1	chr7:15917207-15922371	OK	9.63	10.63	1	0.000117	TRUE
Slc39a11	Slc39a11	chr11:113244854-113565815	OK	3.28	4.27	1	0.000117	TRUE
Spg21	Spg21	chr9:65460936-65488470	OK	4.79	5.79	1	0.000117	TRUE
Tmem74b	Tmem74b	chr2:151702007-151707310	OK	2.15	3.15	1	0.000117	TRUE
Tmem9b	Tmem9b	chr7:109735835-109752263	OK	6.79	7.79	1	0.000117	TRUE
Twf2	Twf2	chr9:106203107-106215387	OK	5.25	6.25	1	0.000117	TRUE
Ube2m	Ube2m	chr7:13035119-13038275	OK	7.89	8.89	1	0.000117	TRUE
Ufsp1	Ufsp1	chr5:137294668-137295664	OK	3.76	4.75	1	0.000117	TRUE
Upf3b	Upf3b	chrX:37091833-37110322	OK	2.72	3.72	1	0.000117	TRUE
Zcchc9	Zcchc9	chr13:91796532-91807696	OK	3.2	4.2	1	0.000117	TRUE
Zwint	Zwint	chr10:72654845-72674964	OK	10.69	11.69	1	0.000117	TRUE
Rbm11	Rbm11	chr16:75592890-75602825	OK	0.54	1.55	1	0.000333	TRUE
Gm10406	Gm10406	chr14:7006114-7027449	OK	0.51	1.51	1	0.000537	TRUE
Oip5	Oip5	chr2:119609531-119650160	OK	0.63	1.63	1	0.00337	TRUE
Gsta3	Gsta3	chr1:21240584-21265575	OK	0.09	1.09	1	0.00565	TRUE
Sfmbt2	Sfmbt2	chr2:10370450-10595253	OK	-0.26	0.73	1	0.00777	TRUE
Gm2011	Gm2011	chr3:40846998-40875609	OK	0.64	1.64	1	0.0153	TRUE
Alg14	Alg14	chr3:121291816-121362011	OK	4.31	5.31	0.99	0.000117	TRUE
Atpaf1	Atpaf1	chr4:115784813-115812314	OK	5.63	6.62	0.99	0.000117	TRUE
Babam1	Babam1	chr8:71396854-71404772	OK	6.21	7.2	0.99	0.000117	TRUE
Bet1l	Bet1l	chr7:140853383-140856383	OK	4.71	5.7	0.99	0.000117	TRUE
Ccdc23	Ccdc23	chr4:119195309-119201298	OK	4.9	5.9	0.99	0.000117	TRUE
Cdc34	Cdc34	chr10:79682194-79688398	OK	5.93	6.92	0.99	0.000117	TRUE
Cir1	Cir1	chr2:73283871-73312592	OK	3.36	4.36	0.99	0.000117	TRUE
Crcp	Crcp	chr5:130029305-130060783	OK	5.45	6.44	0.99	0.000117	TRUE
Ctif	Ctif	chr18:75431220-75697696	OK	-0.03	0.96	0.99	0.000117	TRUE
Dgcr6	Dgcr6	chr16:18052859-18071632	OK	6.4	7.39	0.99	0.000117	TRUE
Ergic3	Ergic3	chr2:156008124-156018279	OK	6.71	7.7	0.99	0.000117	TRUE
Fam195b	Fam195b	chr11:120542887-120549727	OK	7.43	8.42	0.99	0.000117	TRUE
Fcf1	Fcf1	chr12:84970929-84983303	OK	5.5	6.49	0.99	0.000117	TRUE
Gm12669	Gm12669	chr7:137437647-137468594	OK	6.38	7.36	0.99	0.000117	TRUE
H2afy	H2afy	chr13:56073621-56135550	OK	5.97	6.96	0.99	0.000117	TRUE
Iah1	Iah1	chr12:21316391-21373632	OK	4.46	5.45	0.99	0.000117	TRUE
Mrpl10	Mrpl10	chr11:97041585-97049213	OK	6.21	7.2	0.99	0.000117	TRUE
Nanp	Nanp	chr2:151029684-151039379	OK	5.29	6.27	0.99	0.000117	TRUE
Ndfip1	Ndfip1	chr18:38418974-38464406	OK	8.85	9.84	0.99	0.000117	TRUE
Ngdn	Ngdn	chr14:55015453-55024137	OK	5.19	6.18	0.99	0.000117	TRUE
Plp2	Plp2	chrX:7657378-7671278	OK	3.01	4	0.99	0.000117	TRUE
Rab1b	Rab1b	chr19:5099206-5106996	OK	7.62	8.61	0.99	0.000117	TRUE
Rfxap	Rfxap	chr3:54803114-54807791	OK	5.08	6.07	0.99	0.000117	TRUE
Sap30	Sap30	chr8:57482701-57487860	OK	3.12	4.11	0.99	0.000117	TRUE
Thap4	Thap4	chr1:93705390-93754838	OK	4.11	5.1	0.99	0.000117	TRUE
Tmem219	Tmem219	chr7:126886218-126898278	OK	4.2	5.19	0.99	0.000117	TRUE
Tmem59l	Tmem59l	chr8:70483866-70487358	OK	7.73	8.72	0.99	0.000117	TRUE
Trappc3	Trappc3	chr4:126262404-126275883	OK	6.66	7.66	0.99	0.000117	TRUE
Xpa	Xpa	chr4:46175221-46196311	OK	3.69	4.68	0.99	0.000117	TRUE
Arhgef16	Arhgef16	chr4:154278469-154299895	OK	-0.53	0.46	0.99	0.00294	TRUE
Dlx2	Dlx2	chr2:71389259-71903858	OK	3.3	4.28	0.99	0.00311	TRUE
[truncated: 7,193 more rows]
